# Supplementary material for: Regioselective BF3·Et2O-catalyzed C–H functionalization of indoles and pyrrole with reaction of α-diazophosphonates
Source: Royal Society of Chemistry journal article supplement (doi:10.1039/c6ra15329a), 2016-01-01
Supplement: c6ra15329a1.pdf [file c6ra15329a1.pdf]

# Regioselective $\text{BF}_3 \cdot \text{Et}_2\text{O}$ -catalyzed C-H Functionalization of Indoles and Pyrroles with Reaction of $\alpha$ -Diazophosphonates

Yan Cai,<sup>a,c</sup> Yuming Li,<sup>a</sup> Minxuan Zhang,<sup>a</sup> Jiaxin Fu,<sup>a</sup> and Zhiwei Miao<sup>\*a,b</sup>

<sup>a</sup> State Key Laboratory and Institute of Elemento-Organic Chemistry, <sup>b</sup> Collaborative Innovation Center of Chemical Science and Engineering, Nankai University, Tianjin 300071, P. R. China, <sup>c</sup> Tianjin International Joint Academy of Biomedicine, Tianjin 300457, P. R. China, Fax: (+86)-22-2350-2351; e-mail: miaozhiwei@nankai.edu.cn

## Supporting Information

### List of contents (pages)

|                                                                         |     |
|-------------------------------------------------------------------------|-----|
| 1. General comments.....                                                | S1  |
| 2. General procedure for the preparation of <b>3</b> and <b>4</b> ..... | S1  |
| 3. General procedure for the preparation of <b>6</b> and <b>4</b> ..... | S29 |
| 4. X-ray crystal structure of <b>3a</b> and <b>6a</b> .....             | S40 |

#### General Comments.

All reactions and manipulations were performed using standard Schlenk techniques. Solvents were dried and distilled prior to use according to the standard methods. Unless otherwise indicated, all materials were obtained from commercial sources, and used as purchased without dehydration. Flash column chromatography was performed on silica gel (particle size 10-40  $\mu\text{m}$ , Ocean Chemical Factory of Qingdao, China). Nitrogen gas (99.999%) was purchased from Boc Gas Inc.  $^1\text{H}$  NMR,  $^{13}\text{C}$  NMR and  $^{31}\text{P}$  NMR spectra were recorded in  $\text{CDCl}_3$  at Bruker 400 MHz spectrometers, TMS served as internal standard ( $\delta = 0$  ppm) for  $^1\text{H}$  NMR and  $^{13}\text{C}$  NMR,  $\text{H}_3\text{PO}_4$  served as internal standard ( $\delta = 0$  ppm) for  $^{31}\text{P}$  NMR. The crystal structure was determined on a Bruker SMART 1000 CCD diffractometer. Mass spectra were recorded on a LCQ advantage spectrometer with ESI resource. HR-MS were recorded on APEXII and ZAB-HS spectrometer. Melting points were determined on a T-4 melting point apparatus (uncorrected). Optical rotations were recorded on a Perkin Elemer 241 Polarimeter.

#### General procedure for the preparation of **3** and **4**:

The 7.2  $\mu\text{L}$   $\text{BF}_3\cdot\text{Et}_2\text{O}$  (0.056 mmol) and 50 mg indole (0.42 mmol) in an oven-dried Schlenk tube was dissolved in 2 mL of freshly distilled  $\text{CH}_2\text{Cl}_2$  under nitrogen. Dialkyl  $\alpha$ -diazophosphonates **1** (0.28 mmol) was diluted with 2 mL of  $\text{CH}_2\text{Cl}_2$  and was drawn into a gastight syringe. It was then added to the reaction mixture dropwise over a period of 1.5h with the help of a syringe pump. After the addition was complete, the reaction mixture was stirred for another 2 hour at 25  $^\circ\text{C}$ . The solvent was then removed under reduced pressure and the crude residue was purified by silica gel chromatography with the eluent [ $\text{CH}_2\text{Cl}_2/\text{EtOAc}$ , 15:1 (v:v)] to give the corresponding products **3** and **4**.

### Diethyl (2-(1,3-dioxoisindolin-2-yl)-2-(1H-indol-3-yl)propyl)phosphonate (3a):

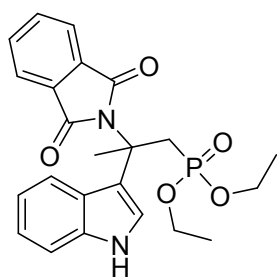

White solid; mp: 146-147 °C;  $^1\text{H}$  NMR (400 MHz,  $\text{CDCl}_3$ ):  $\delta$  8.45 (d,  $J = 48.0$  Hz, 1H, N-H), 7.70-7.79 (m, 2H, Ph), 7.60-7.68 (m, 2H, Ph), 7.55 (d,  $J = 7.9$  Hz, 1H, Ph), 7.35 (d,  $J = 7.9$  Hz, 1H, Ph), 7.09-7.17 (m, 2H, Ph, =CH), 6.99 (t,  $J = 7.3$  Hz, 1H, Ph), 3.78-4.25 (m, 5H,  $2\text{OCH}_2$ ,  $\text{CH}_2\text{P}$ ), 2.71 (dd,  $J = 20.4, 15.6$  Hz, 1H,  $\text{CH}_2\text{P}$ ), 2.48 (s, 3H,  $\text{CH}_3$ ), 1.19 (t,  $J = 6.9$  Hz, 3H,  $\text{CH}_3$ ), 1.11 (t,  $J = 6.9$  Hz, 3H,  $\text{CH}_3$ );  $^{13}\text{C}$  NMR (101 MHz,  $\text{CDCl}_3$ ):  $\delta$  169.23 (s, C=O), 136.84, 133.72, 131.93, 124.30, 122.85 (s, Ph), 122.00 (s, =C), 121.97, 120.51, 119.69, 119.23 (s, Ph), 111.72 (s, =CH), 61.71 (d,  $J = 6.6$  Hz,  $\text{OCH}_2$ ), 61.56 (d,  $J = 6.6$  Hz,  $\text{OCH}_2$ ), 58.10 (d,  $J = 4.3$  Hz, N-C), 34.94 (d,  $J = 141.5$  Hz,  $\text{CH}_2\text{P}$ ), 27.52 (s,  $\text{CH}_3$ ), 16.20 (d,  $J = 6.7$  Hz,  $\text{CH}_3$ ), 16.12 (d,  $J = 6.7$  Hz,  $\text{CH}_3$ );  $^{31}\text{P}$  NMR (162 MHz,  $\text{CDCl}_3$ ):  $\delta$  26.75 (s); ESI-HRMS calcd for  $[\text{C}_{23}\text{H}_{25}\text{N}_2\text{O}_5\text{P}, \text{M} + \text{Na}]^+$ : 463.1393, Found: 463.1394.

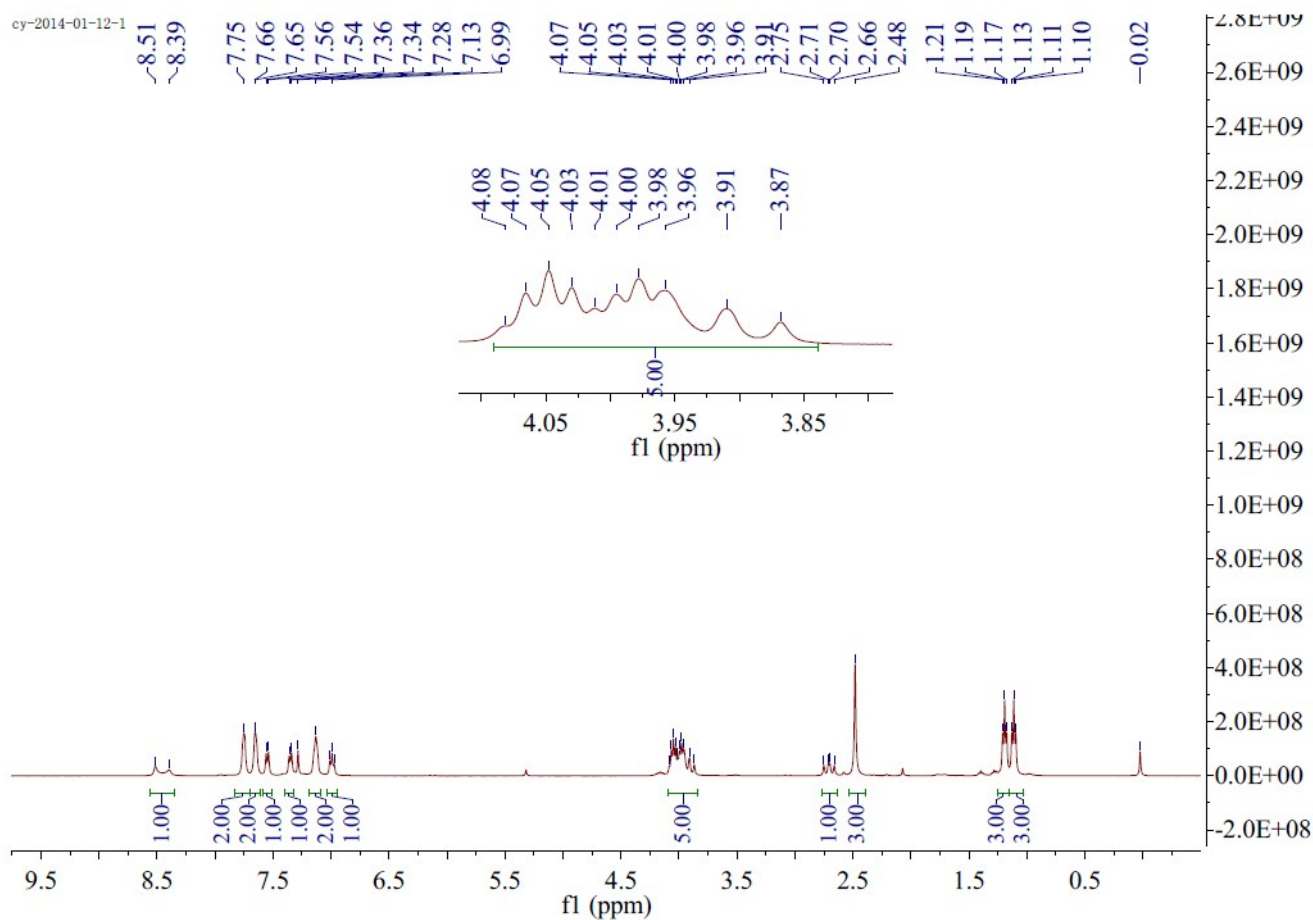

cy-2014-01-12-1  
13CPD

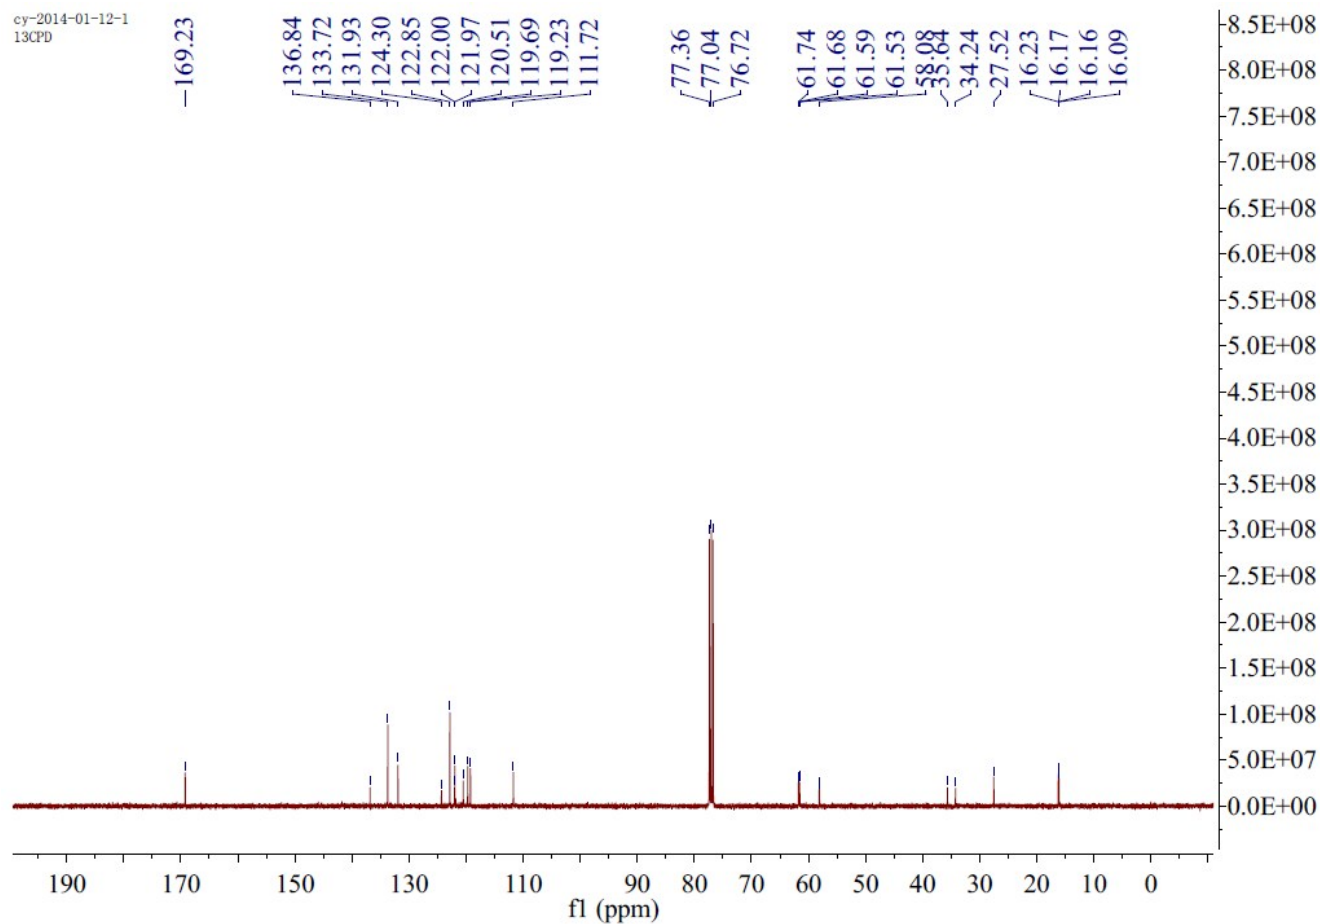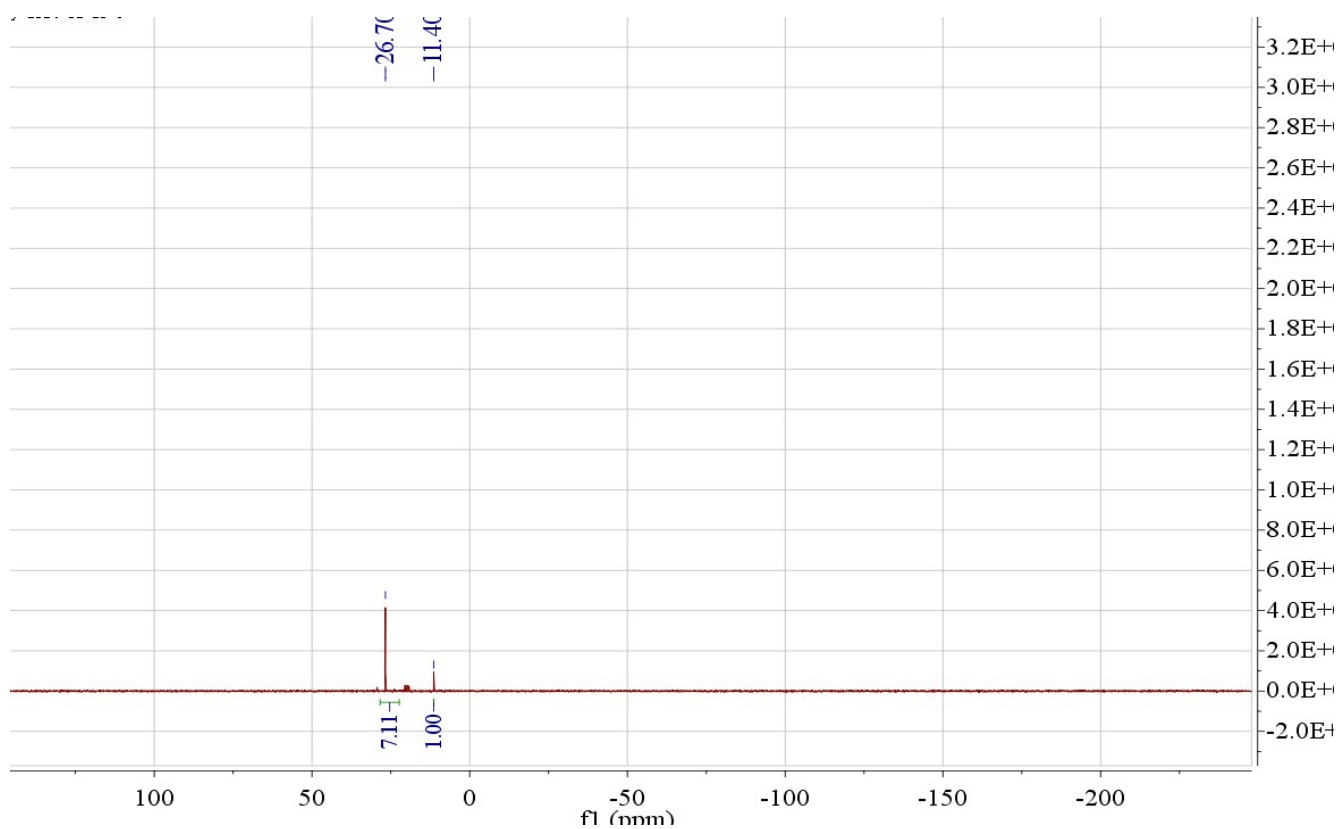

The mole ratio of **3a** and **4a** determined by crude  $^{31}\text{P}$  NMR

**Methyl 3-(1-(diethoxyphosphoryl)-2-(1,3-dioxoisindolin-2-yl)propan-2-yl)-1H-indole-4-carboxylate (3d):**

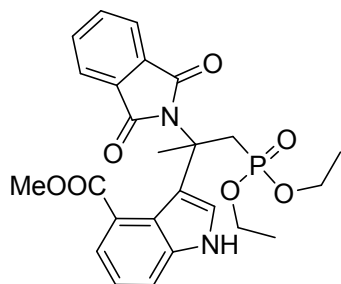

White solid; mp: 163-164 °C;  $^1\text{H}$  NMR (400 MHz,  $\text{CDCl}_3$ ):  $\delta$  10.13 (s, 1H, N-H), 7.71-7.77 (m, 2H, Ph), 7.64-7.69 (m, 2H, Ph), 7.57 (d,  $J = 8.0$  Hz, 1H, Ph), 7.29 (d,  $J = 2.6$  Hz, 1H, =CH), 7.18 (d,  $J = 6.5$  Hz, 1H, Ph), 7.08 (t,  $J = 7.7$  Hz, 1H, Ph), 3.90-4.19 (m, 3H,  $\text{OCH}_2$ ,  $\text{CH}_2\text{P}$ ), 3.71 (dd,  $J = 17.9$ , 15.5 Hz, 1H,  $\text{CH}_2\text{P}$ ), 3.39-3.56 (m, 2H,  $\text{OCH}_2$ ), 3.26 (s, 3H,  $\text{OCH}_3$ ), 2.37 (s, 3H,  $\text{CH}_3$ ), 1.29 (t,  $J = 7.1$  Hz, 3H,  $\text{CH}_3$ ), 0.57 (t,  $J = 7.1$  Hz, 3H,  $\text{CH}_3$ );  $^{13}\text{C}$  NMR (101 MHz,  $\text{CDCl}_3$ ):  $\delta$  171.08, 168.61 (s, C=O), 138.11, 133.62, 132.39, 125.30, 124.66, 122.63, 121.73, 121.65, 120.35 (s, Ph), 115.50 (s, =CH), 61.75 (d,  $J = 6.7$  Hz,  $\text{OCH}_2$ ), 61.10 (d,  $J = 6.7$  Hz,  $\text{OCH}_2$ ), 58.72 (d,  $J = 3.5$  Hz, N-C), 51.62 (s,  $\text{OCH}_3$ ), 34.49 (d,  $J = 140.1$  Hz,  $\text{CH}_2\text{P}$ ), 27.76 (s,  $\text{CH}_3$ ), 16.31 (d,  $J = 6.9$  Hz,  $\text{CH}_3$ ), 15.28 (d,  $J = 6.9$  Hz,  $\text{CH}_3$ );  $^{31}\text{P}$  NMR (162 MHz,  $\text{CDCl}_3$ ):  $\delta$  27.09 (s); ESI-HRMS calcd for  $[\text{C}_{25}\text{H}_{27}\text{N}_2\text{O}_7\text{P}, \text{M} + \text{Na}]^+$ : 521.1448, Found: 521.1441.

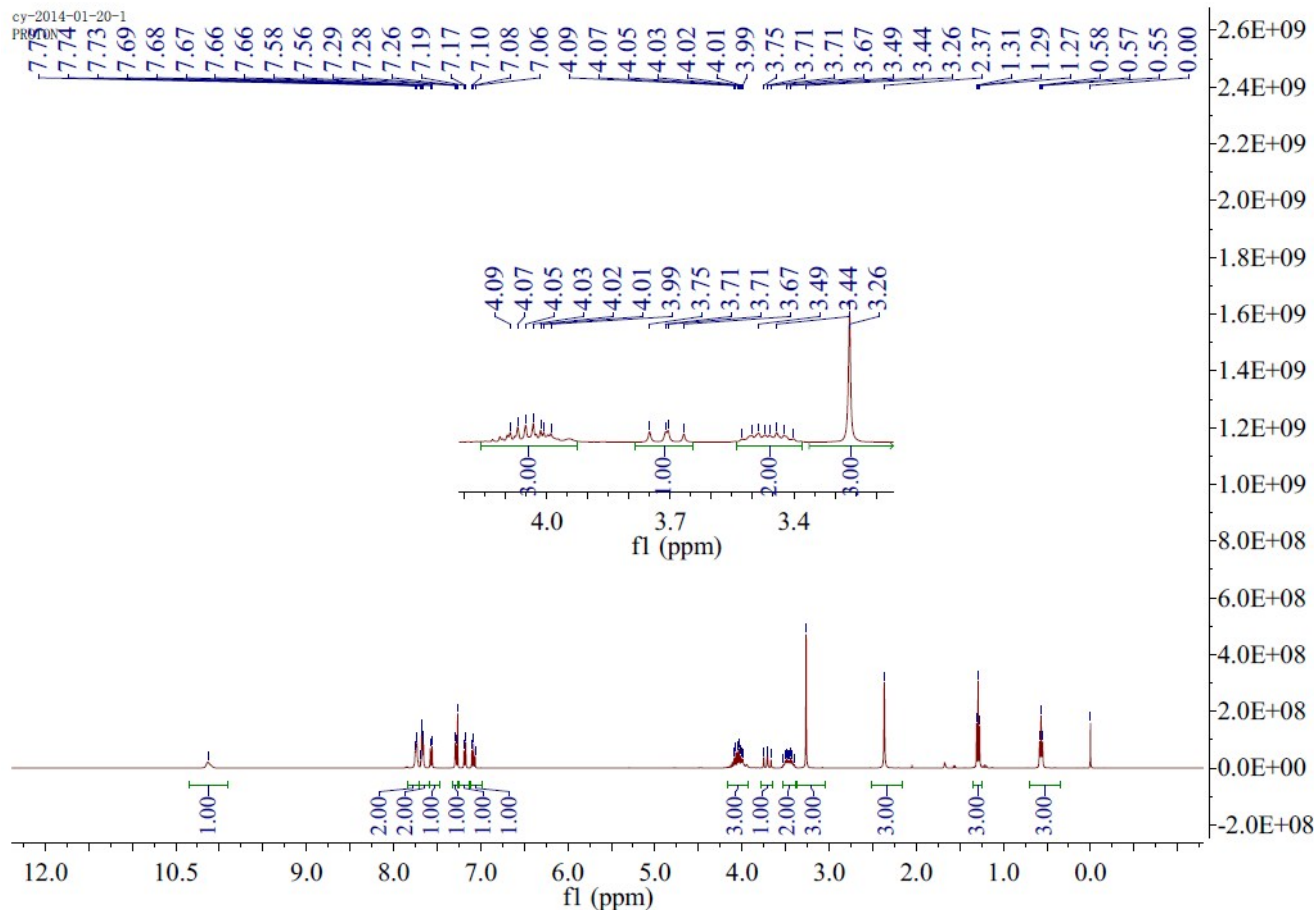

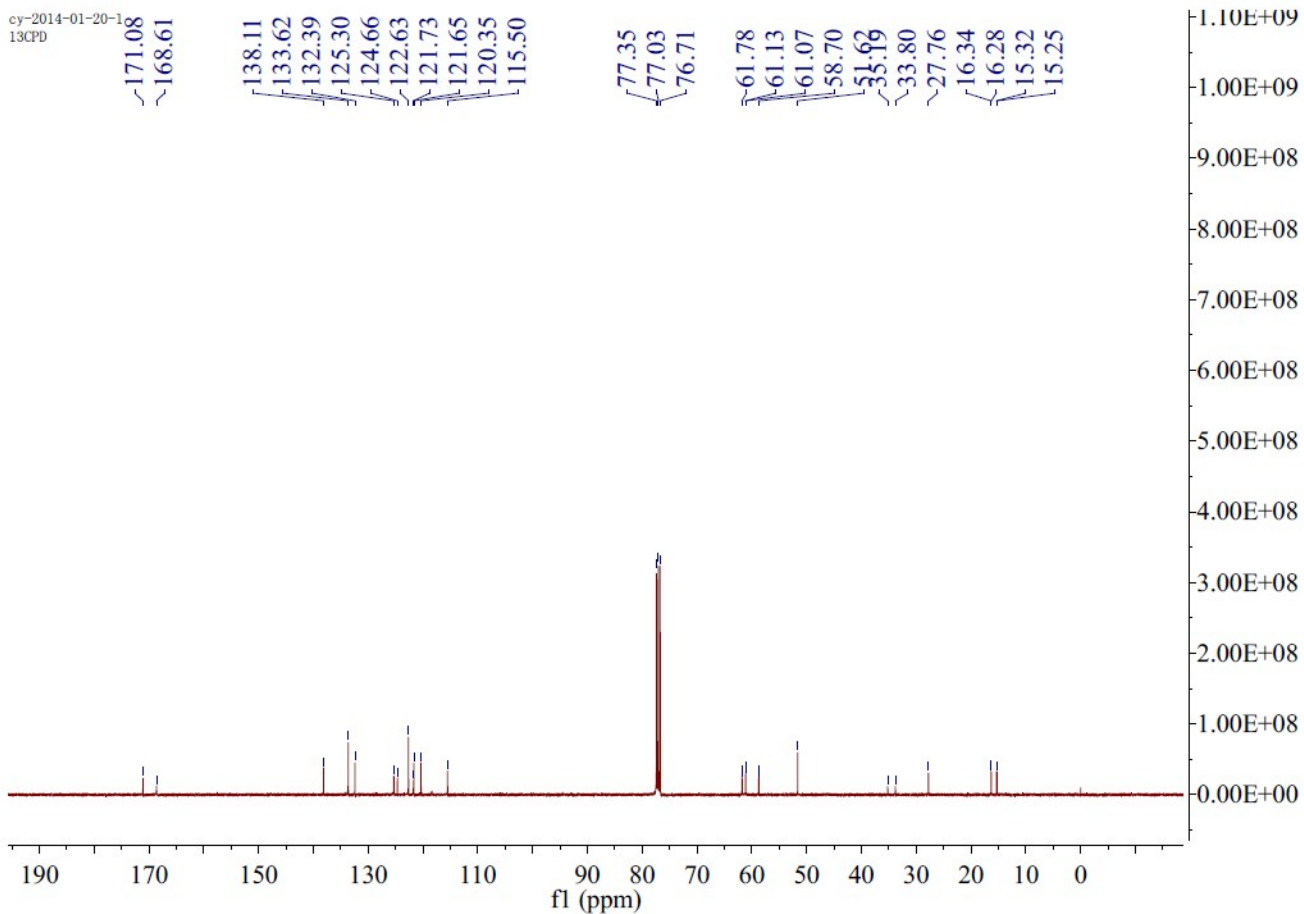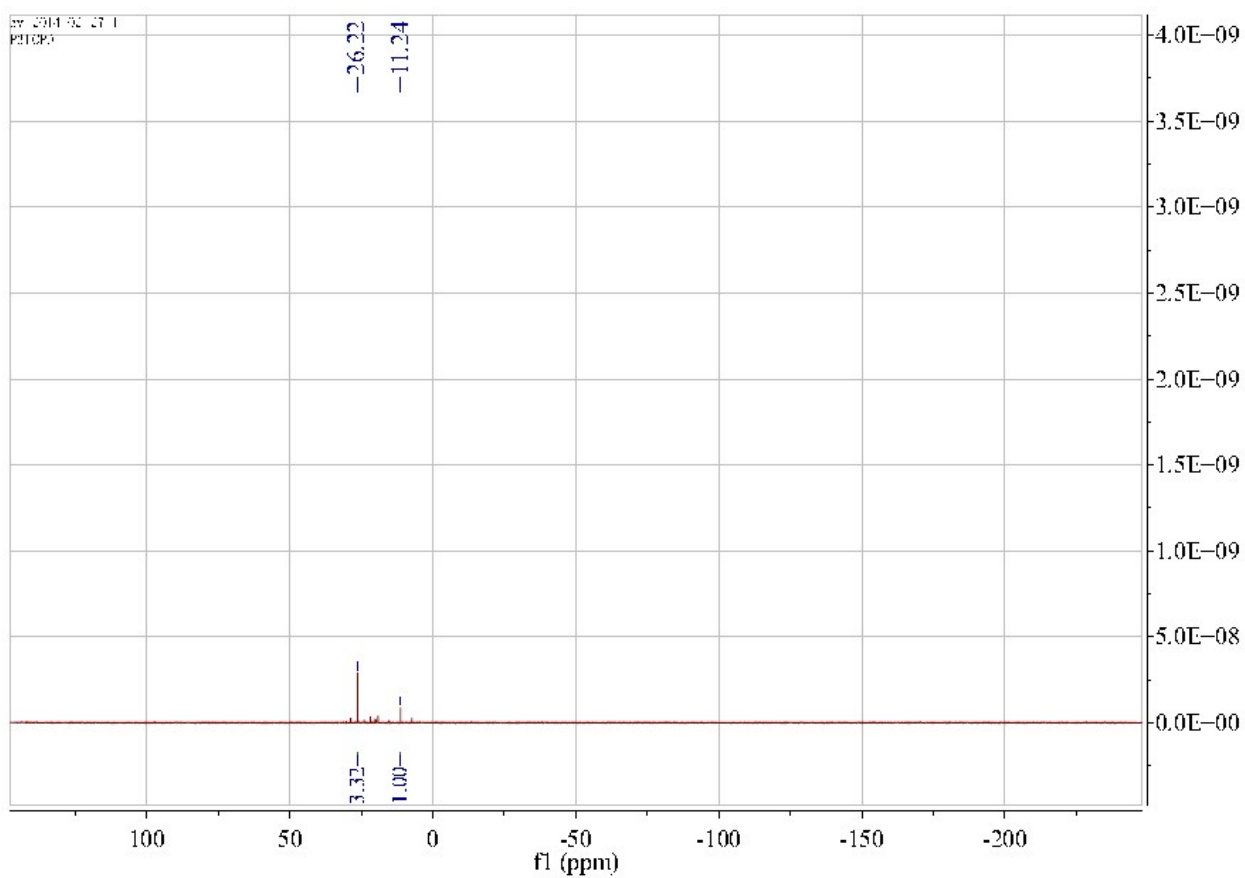

The mole ratio of **3d** and **4a** determined by crude  $^{31}\text{P}$  NMR

### Diethyl (2-(1,3-dioxoisindolin-2-yl)-2-(5-methyl-1H-indol-3-yl)propyl)phosphonate (3e):

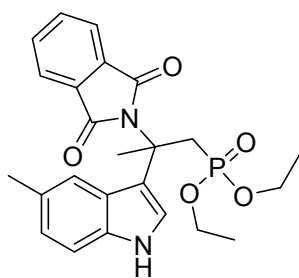

White solid; mp: 118-119 °C;  $^1\text{H}$  NMR (400 MHz,  $\text{CDCl}_3$ ):  $\delta$  8.30 (d,  $J = 37.4$  Hz, 1H, N-H), 7.65-7.75 (m, 2H, Ph), 7.53-7.62 (m, 2H, Ph), 7.21 (s, 1H, Ph), 7.16 (d,  $J = 8.2$  Hz, 1H, Ph), 7.01 (s, 1H, =CH), 6.88 (d,  $J = 8.2$  Hz, 1H, Ph), 3.76-4.04 (m, 5H,  $2\text{OCH}_2$ ,  $\text{CH}_2\text{P}$ ), 2.63 (dd,  $J = 20.3, 15.6$  Hz, 1H,  $\text{CH}_2\text{P}$ ), 2.40 (s, 3H,  $\text{CH}_3$ ), 2.25 (s, 3H,  $\text{CH}_3$ ), 1.11 (t,  $J = 6.9$  Hz, 3H,  $\text{CH}_3$ ), 1.04 (t,  $J = 6.9$  Hz, 3H,  $\text{CH}_3$ );  $^{13}\text{C}$  NMR (101 MHz,  $\text{CDCl}_3$ ):  $\delta$  169.23 (s, C=O), 135.17, 133.69, 131.97, 128.79, 124.50, 123.61, 122.83, 120.70, 118.92 (s, Ph), 111.38 (s, =CH), 61.74 (d,  $J = 6.6$  Hz,  $\text{OCH}_2$ ), 61.60 (d,  $J = 6.6$  Hz,  $\text{OCH}_2$ ), 58.11 (d,  $J = 2.4$  Hz, N-C), 34.89 (d,  $J = 141.7$  Hz,  $\text{CH}_2\text{P}$ ), 27.47 (s,  $\text{CH}_3$ ), 21.67 (s,  $\text{CH}_3$ ), 16.17 (d,  $J = 6.5$  Hz,  $\text{CH}_3$ ), 16.11 (d,  $J = 6.5$  Hz,  $\text{CH}_3$ );  $^{31}\text{P}$  NMR (162 MHz,  $\text{CDCl}_3$ ):  $\delta$  26.86 (s); ESI-HRMS calcd for  $[\text{C}_{24}\text{H}_{27}\text{N}_2\text{O}_5\text{P}, \text{M} + \text{Na}]^+$ : 477.1550, Found: 477.1548.

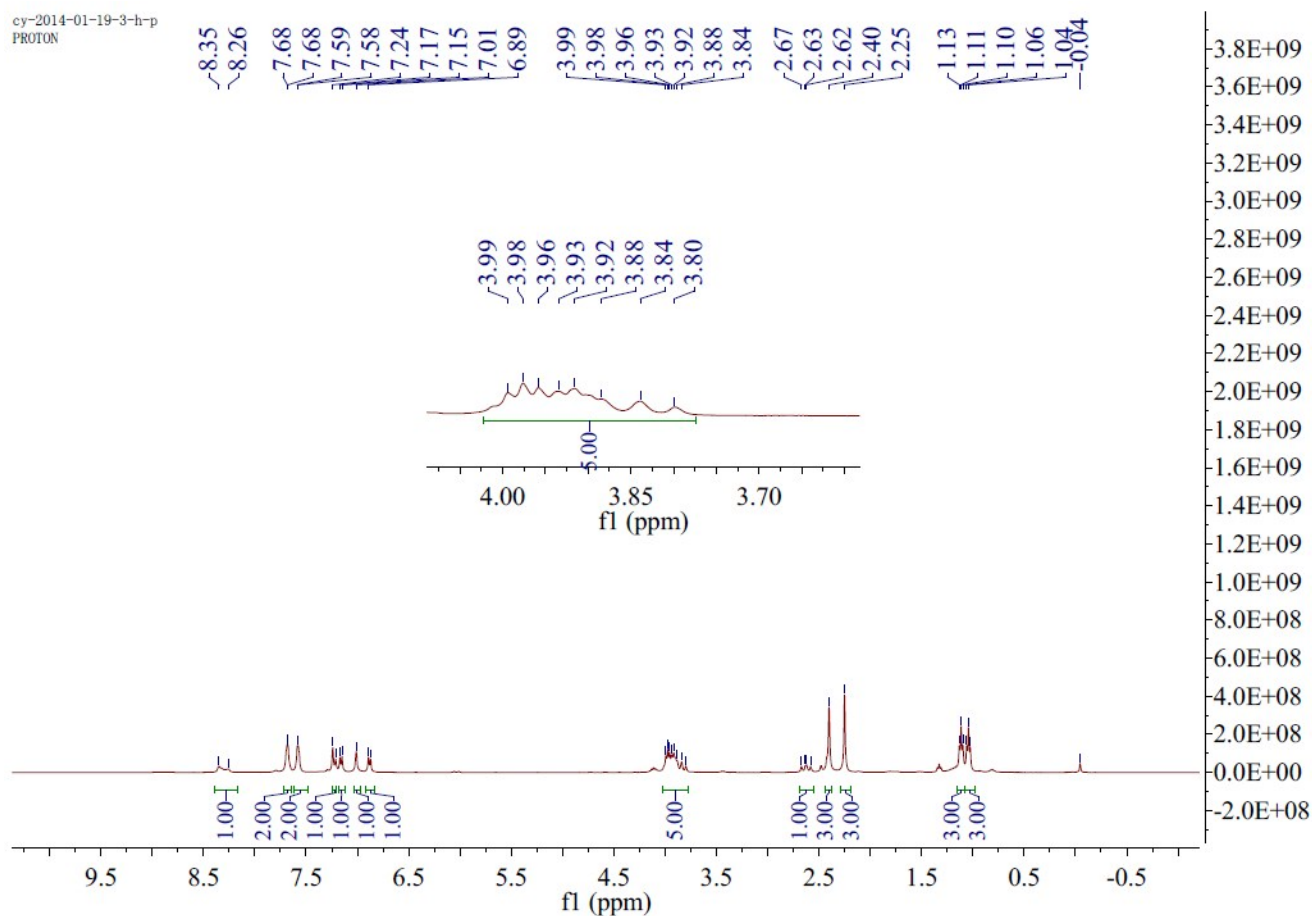

cy-2014-01-19-3  
test

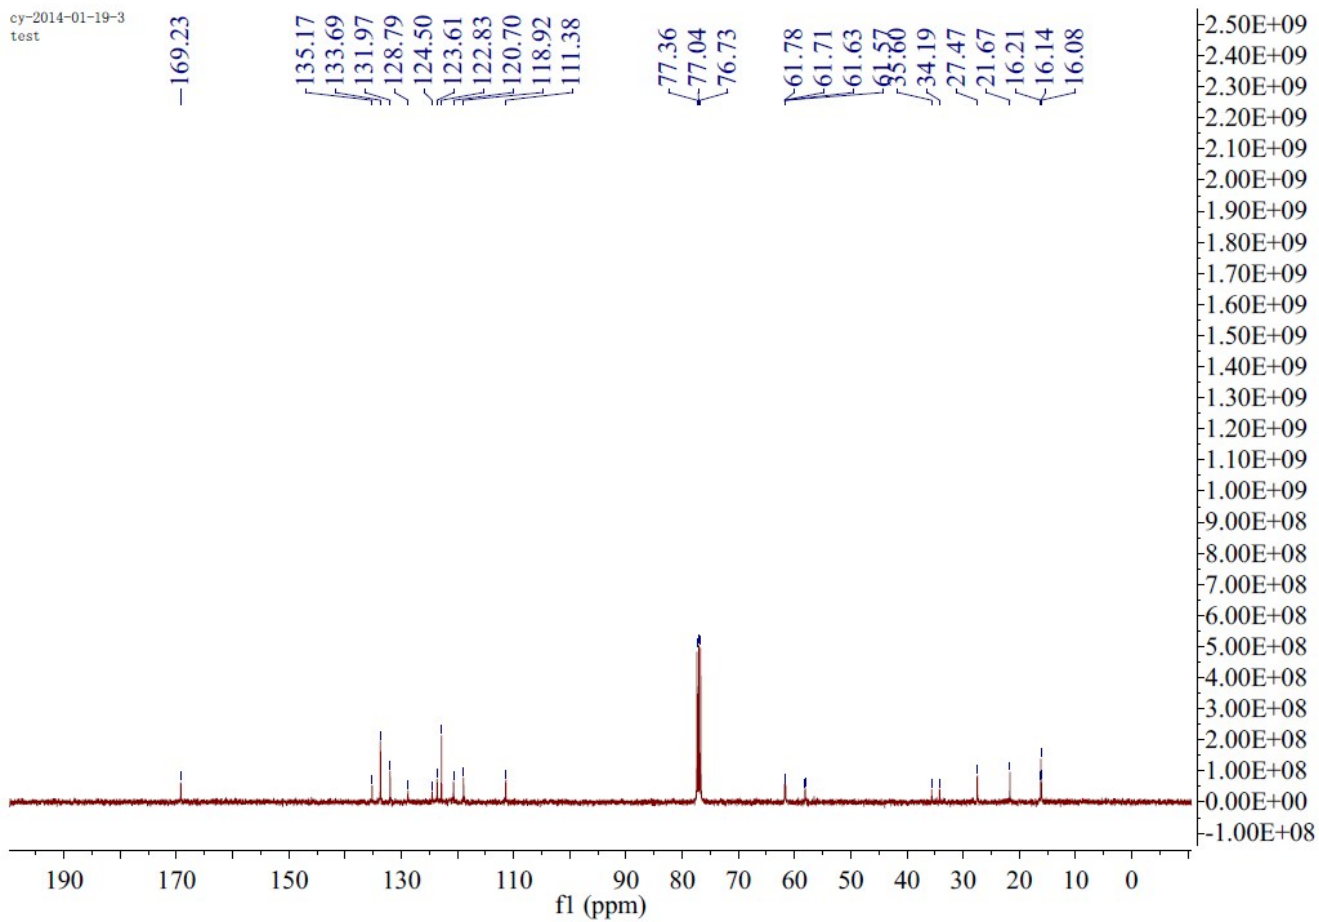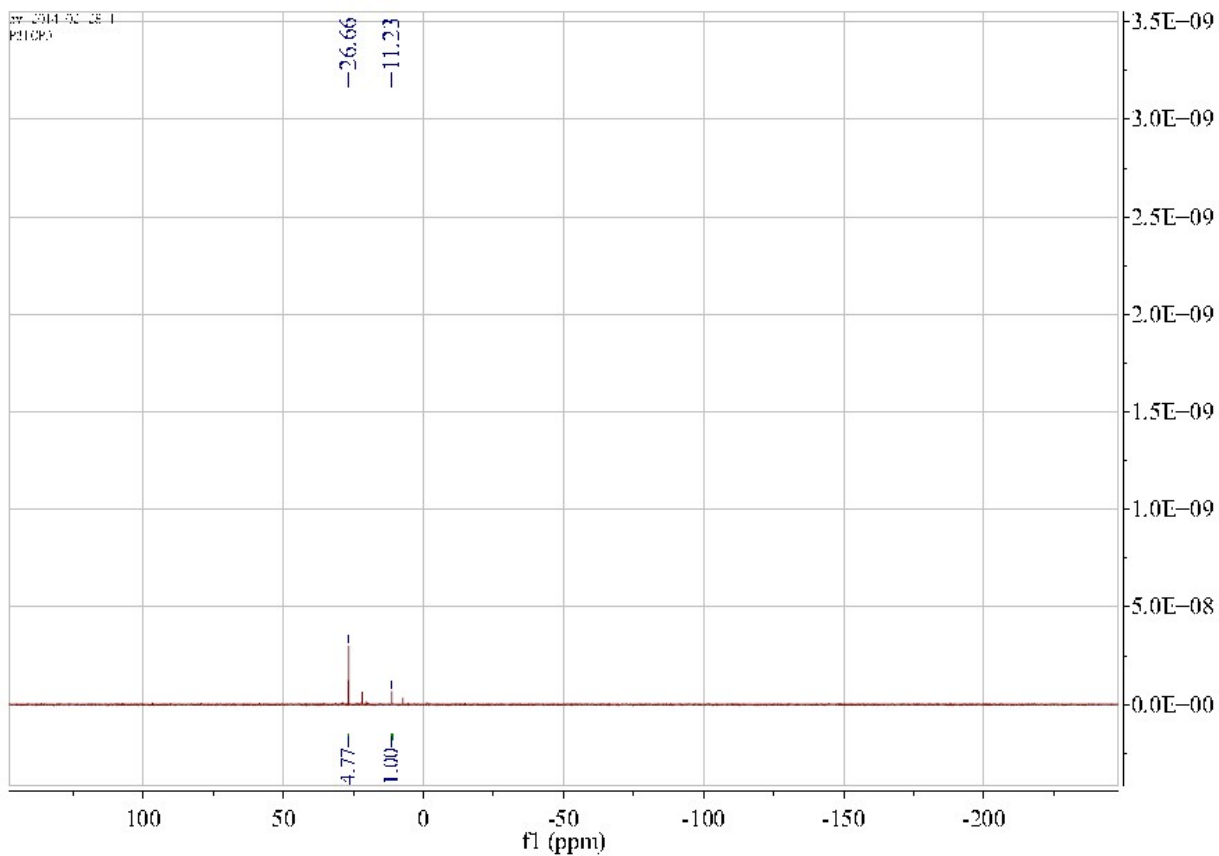

The mole ratio of **3e** and **4a** determined by crude <sup>31</sup>P NMR



**Diethyl (2-(1,3-dioxisoindolin-2-yl)-2-(6-methoxy-1H-indol-3-yl)propyl)phosphonate (3f):**

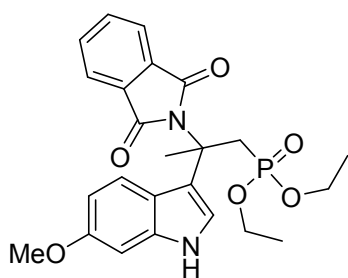

Faint yellow solid; mp: 129-130 °C;  $^1\text{H}$  NMR (400 MHz,  $\text{CDCl}_3$ ):  $\delta$  8.23 (s, 1H, N-H), 7.69-7.80 (m, 2H, Ph), 7.58-7.67 (m, 2H, Ph), 7.37 (d,  $J$  = 8.7 Hz, 1H, Ph), 7.00 (s, 1H, Ph), 6.76 (s, 1H, =CH), 6.63 (d,  $J$  = 8.6 Hz, 1H, Ph), 3.92-4.10 (m, 4H,  $2\text{OCH}_2$ ), 3.81-3.91 (m, 1H,  $\text{CH}_2\text{P}$ ), 3.74 (s, 3H,  $\text{OCH}_3$ ), 2.64 (dd,  $J$  = 20.7, 15.3 Hz, 1H,  $\text{CH}_2\text{P}$ ), 2.43 (s, 3H,  $\text{CH}_3$ ), 1.17 (t,  $J$  = 7.0 Hz, 3H,  $\text{CH}_3$ ), 1.10 (t,  $J$  = 7.0 Hz, 3H,  $\text{CH}_3$ );  $^{13}\text{C}$  NMR (101 MHz,  $\text{CDCl}_3$ ):  $\delta$  169.23 (s, C=O), 156.28, 137.66, 133.74, 131.92, 122.85, 119.74, 119.17 (s, Ph), 118.68 (s, =C), 109.74 (s, Ph), 94.97 (s, =CH), 61.70 (d,  $J$  = 6.7 Hz,  $\text{OCH}_2$ ), 61.55 (d,  $J$  = 6.7 Hz,  $\text{OCH}_2$ ), 58.06 (d,  $J$  = 4.6 Hz, N-C), 55.51 (s,  $\text{OCH}_3$ ), 34.85 (d,  $J$  = 141.0 Hz,  $\text{CH}_2\text{P}$ ), 27.63 (s,  $\text{CH}_3$ ), 16.21 (d,  $J$  = 6.2 Hz,  $\text{CH}_3$ ), 16.14 (d,  $J$  = 6.2 Hz,  $\text{CH}_3$ );  $^{31}\text{P}$  NMR (162 MHz,  $\text{CDCl}_3$ ):  $\delta$  26.80 (s); ESI-HRMS calcd for  $[\text{C}_{24}\text{H}_{27}\text{N}_2\text{O}_6\text{P}, \text{M} + \text{Na}]^+$ : 493.1499, Found: 493.1495.

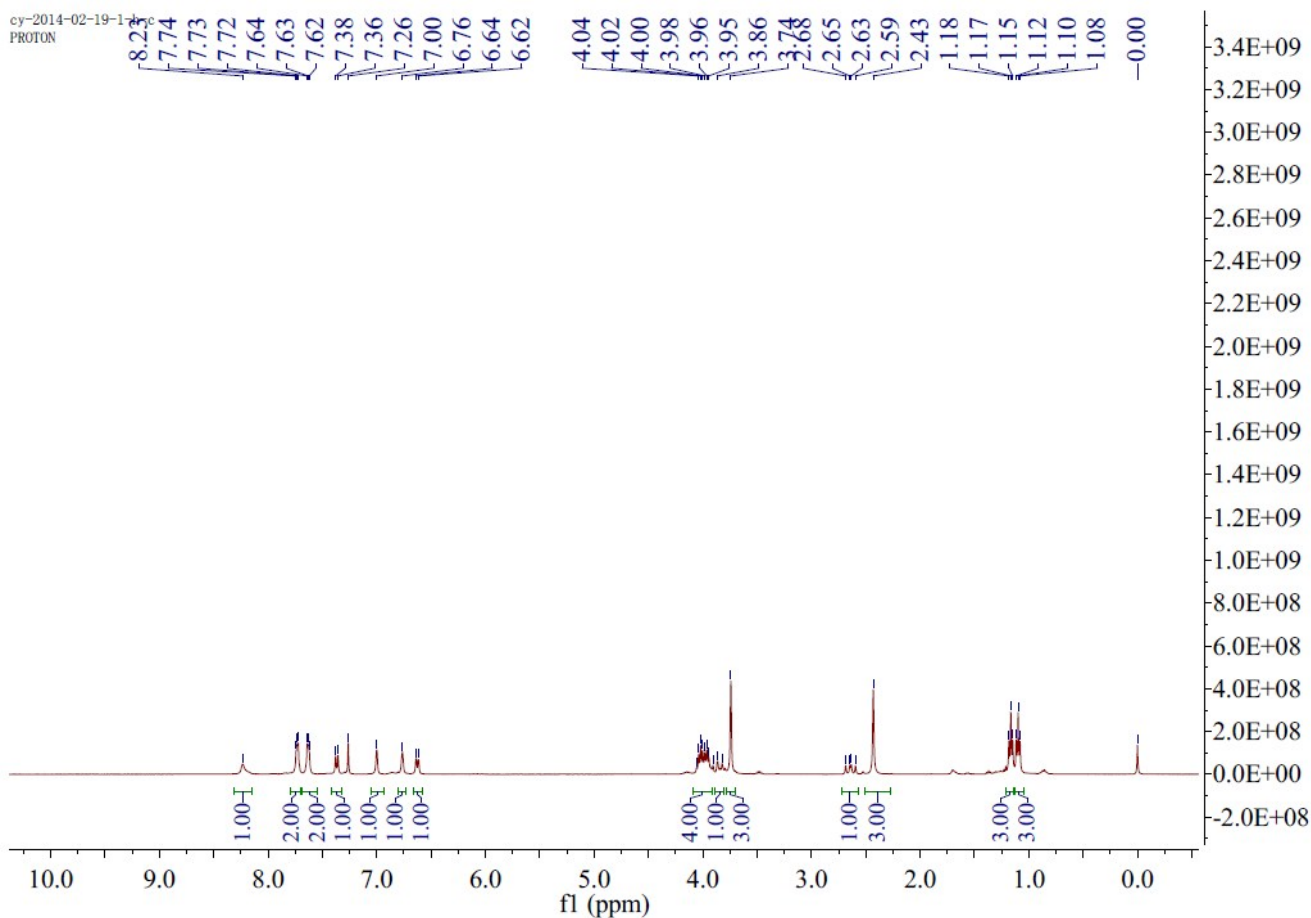

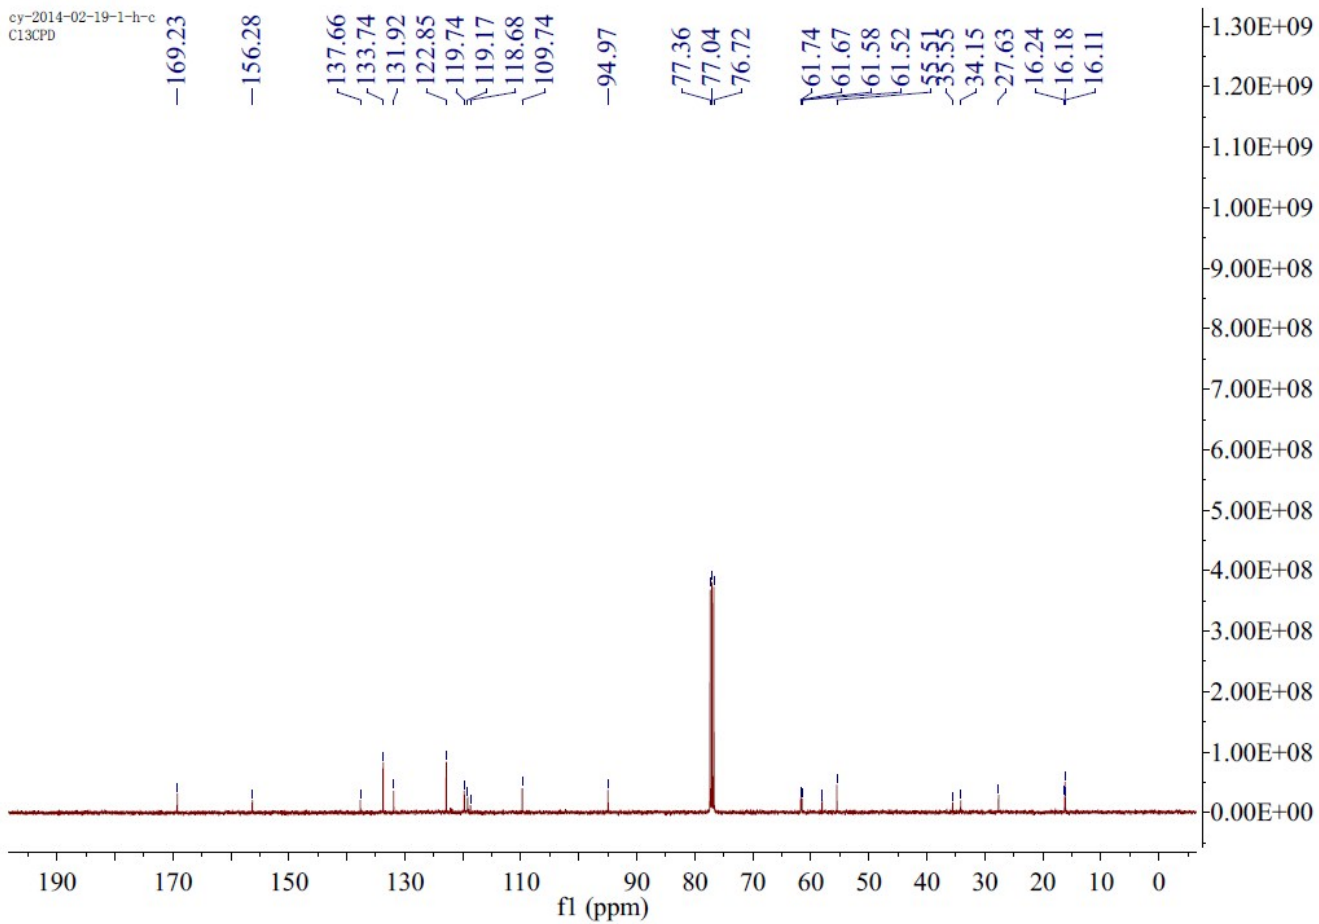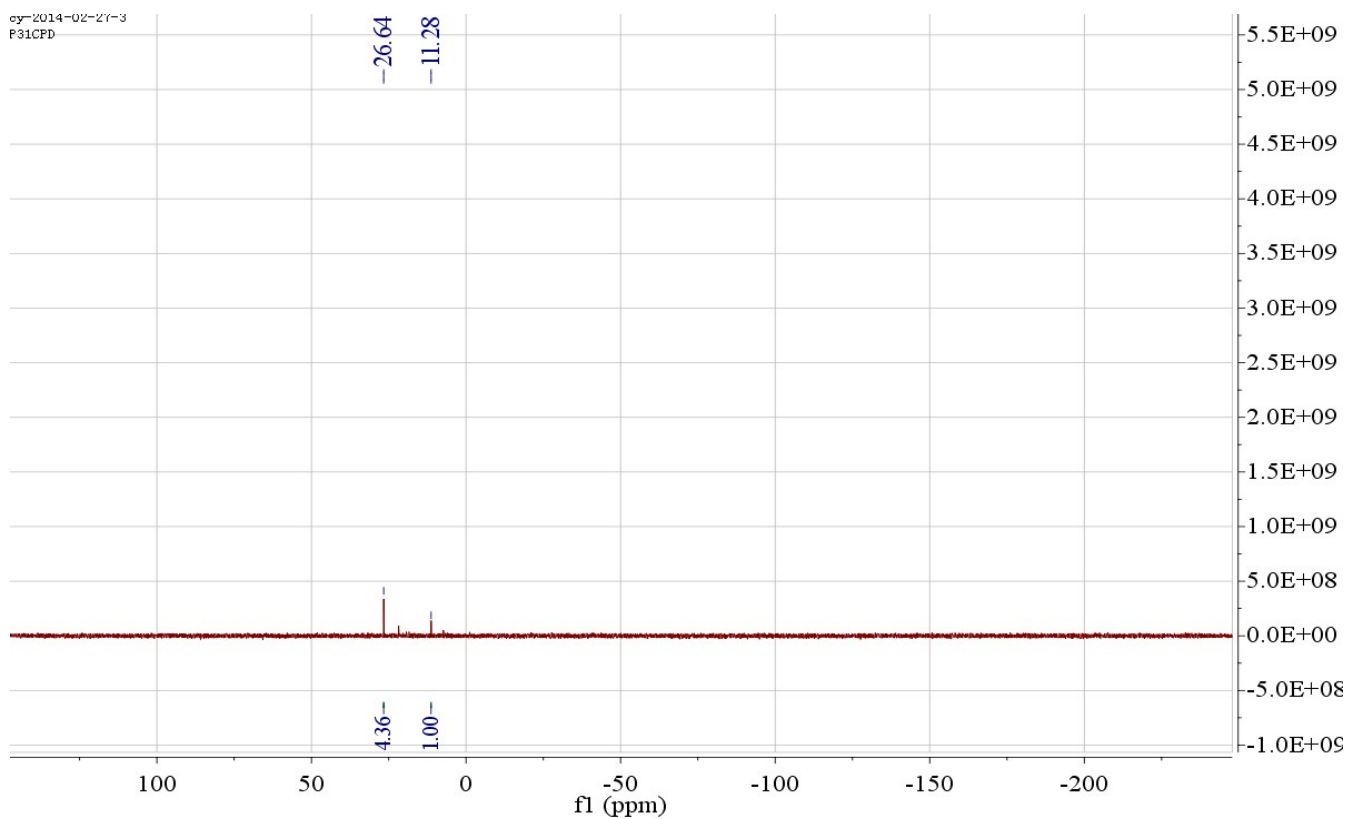

The mole ratio of **3f** and **4a** determined by crude  $^{31}\text{P}$  NMR

### Diethyl (2-(6-bromo-1H-indol-3-yl)-2-(1,3-dioxoisindolin-2-yl)propyl)phosphonate (3g):

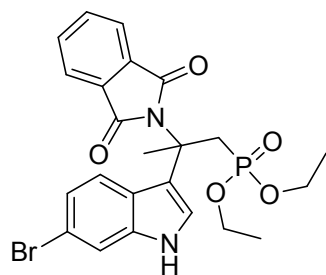

Yellow Solid; mp: 170-172 °C; <sup>1</sup>H NMR (400 MHz, *d*-DMSO): δ 11.21 (s, 1H, N-H), 7.75-7.86 (m, 4H, Ph), 7.54 (s, 1H, Ph), 7.46 (s, 1H, =CH), 7.19 (d, *J* = 8.5 Hz, 1H, Ph), 7.00 (d, *J* = 8.5 Hz, 1H, Ph), 3.90-4.01 (m, 2H, OCH<sub>2</sub>), 3.77-3.89 (m, 2H, OCH<sub>2</sub>), 3.57 (t, *J* = 16.5 Hz, 1H, CH<sub>2</sub>P), 2.78 (dd, *J* = 19.8, 15.8 Hz, 1H, CH<sub>2</sub>P), 2.26 (s, 3H, CH<sub>3</sub>), 1.13 (t, *J* = 6.9 Hz, 3H, CH<sub>3</sub>), 0.95 (t, *J* = 6.9 Hz, 3H, CH<sub>3</sub>); <sup>13</sup>C NMR (101 MHz, *d*-DMSO): δ 168.99 (s, C=O), 138.01, 134.97, 131.62, 123.30, 123.22, 122.19, 121.94 (s, Ph), 121.76 (s, =C), 119.90, 114.96 (s, Ph), 114.21 (s, =CH), 61.65 (d, *J* = 6.3 Hz, OCH<sub>2</sub>), 61.23 (d, *J* = 6.3 Hz, OCH<sub>2</sub>), 57.94 (d, *J* = 5.0 Hz, N-C), 34.15 (d, *J* = 138.8 Hz, CH<sub>2</sub>P), 28.20 (s, CH<sub>3</sub>), 16.51 (d, *J* = 6.2 Hz, CH<sub>3</sub>), 16.24 (d, *J* = 6.2 Hz, CH<sub>3</sub>); <sup>31</sup>P NMR (162 MHz, *d*-DMSO): δ 26.51 (s); ESI-HRMS calcd for [C<sub>23</sub>H<sub>24</sub>BrN<sub>2</sub>O<sub>5</sub>P, M + Na]<sup>+</sup>: 541.0498, Found: 541.0496.

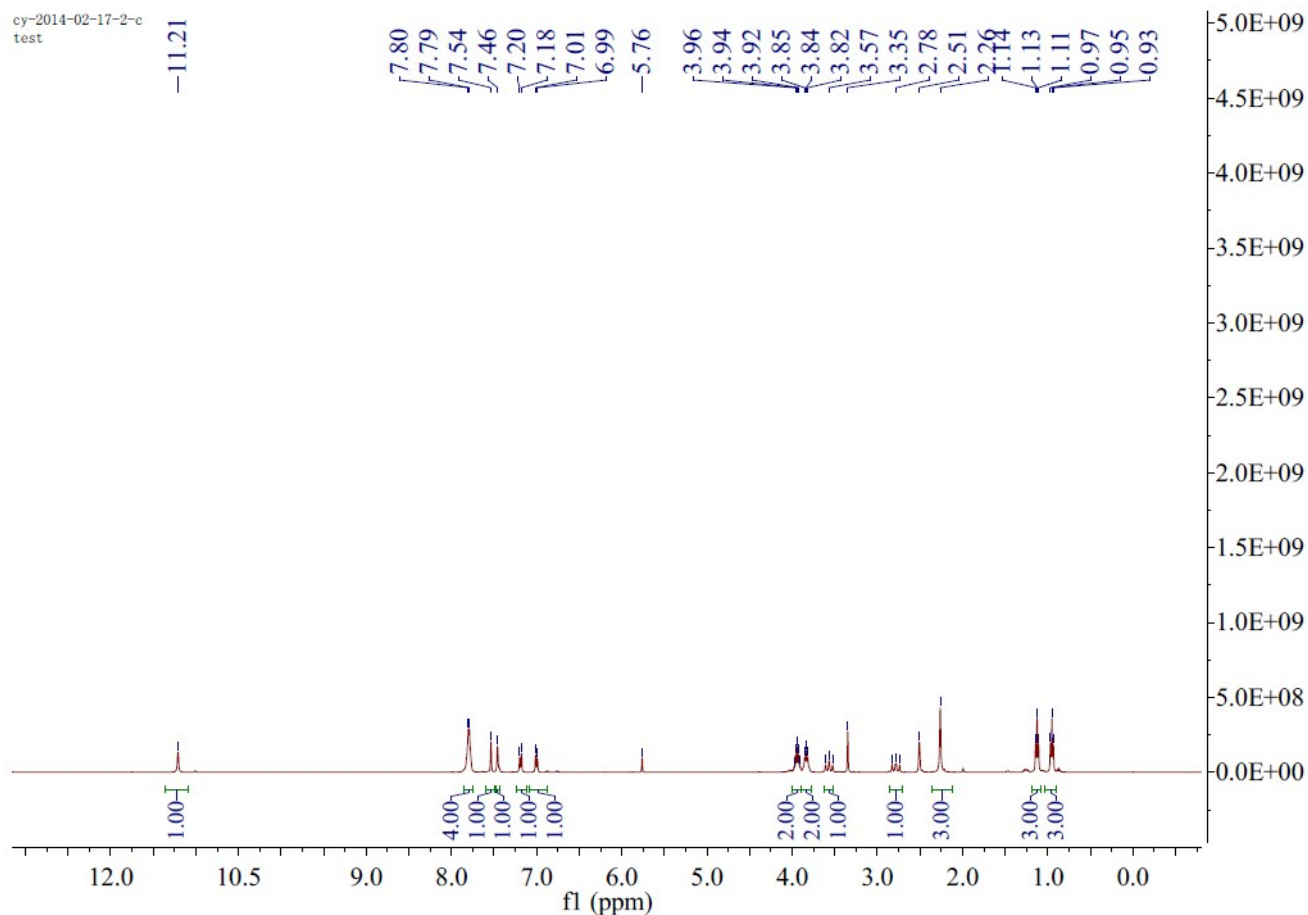

cy-2014-02-17-2-c  
test

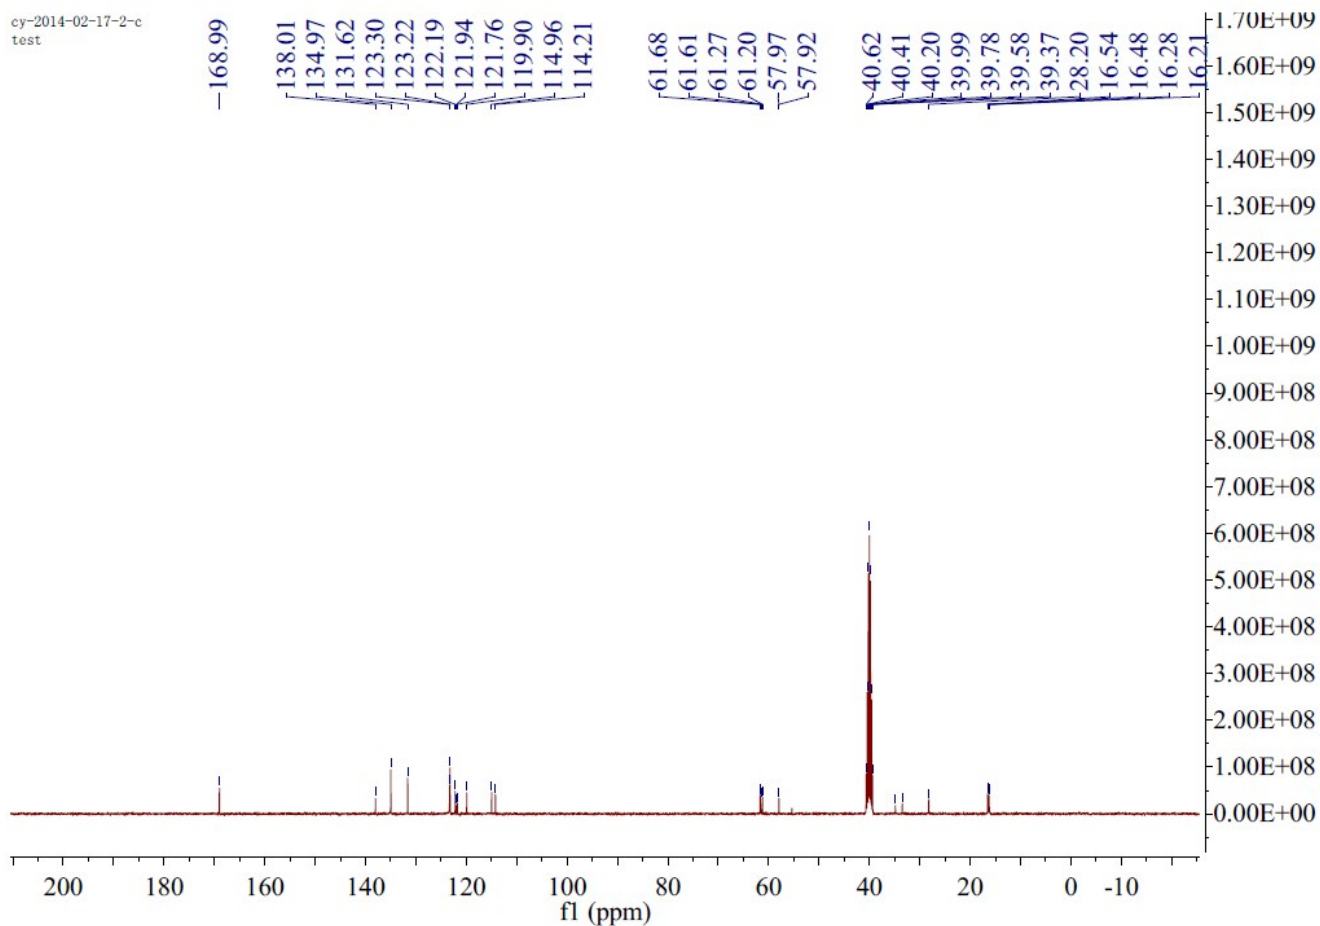

cy-2014-02-27-2  
31CPD

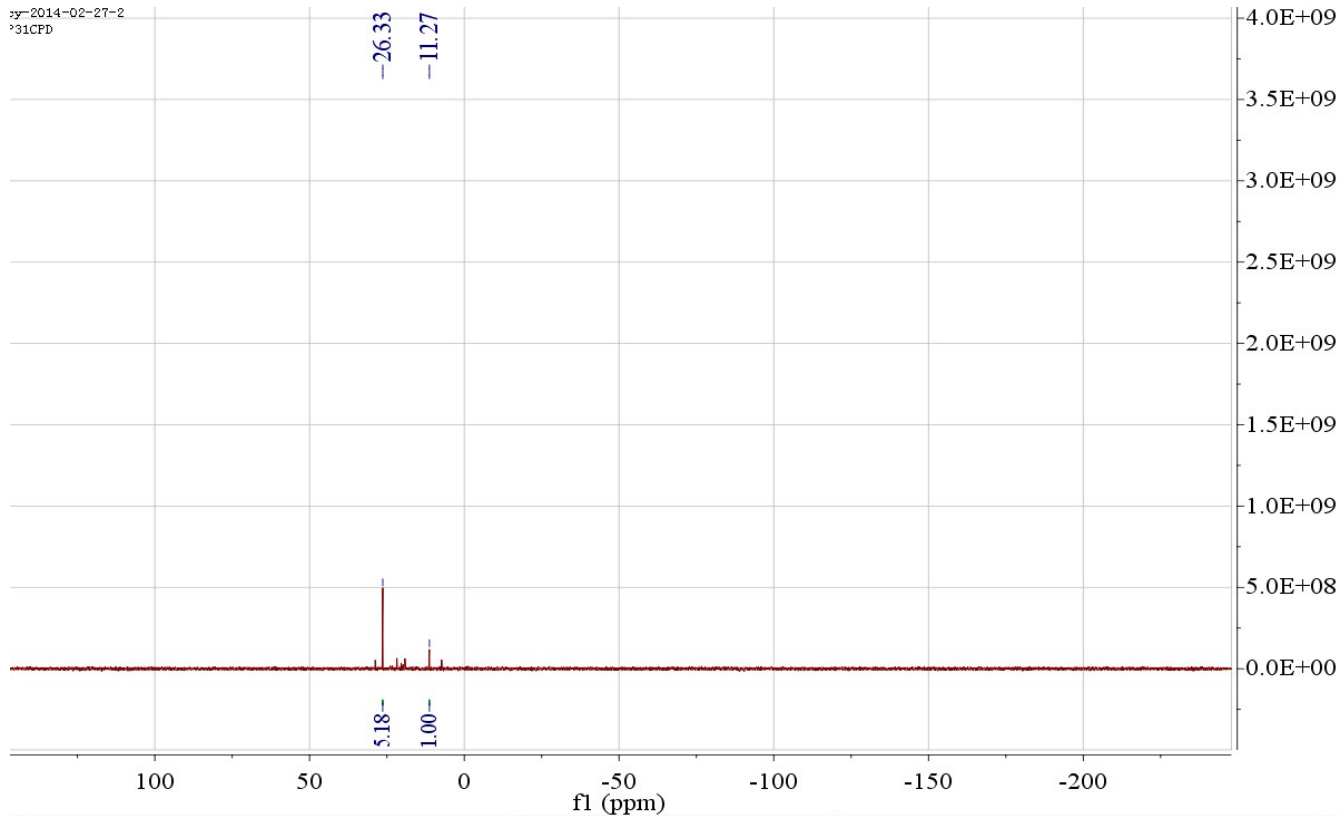

The mole ratio of **3g** and **4a** determined by crude <sup>31</sup>P-NMR

**Methyl 3-(1-(diethoxyphosphoryl)-2-(1,3-dioxoisindolin-2-yl)propan-2-yl)-1H-indole-6-carboxylate (3h):**

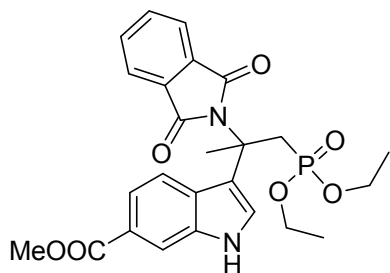

White solid; mp: 160-161 °C;  $^1\text{H}$  NMR (400 MHz,  $\text{CDCl}_3$ ):  $\delta$  9.02 (s, 1H, N-H), 8.06 (s, 1H, Ph), 7.73-7.80 (m, 2H, Ph), 7.62-7.70 (m, 3H, Ph), 7.53 (d,  $J = 8.5$  Hz, 1H, Ph), 7.33 (d,  $J = 2.0$  Hz, 1H, =CH), 4.01-4.11 (m, 2H,  $\text{OCH}_2$ ), 3.90-3.98 (m, 2H,  $\text{OCH}_2$ ), 3.79-3.90 (m, 4H,  $\text{OCH}_3$ ,  $\text{CH}_2\text{P}$ ), 2.79 (dd,  $J = 20.8, 15.2$  Hz, 1H,  $\text{CH}_2\text{P}$ ), 2.47 (s, 3H,  $\text{CH}_3$ ), 1.21 (t,  $J = 7.1$  Hz, 3H,  $\text{CH}_3$ ), 1.08 (t,  $J = 7.1$  Hz, 3H,  $\text{CH}_3$ );  $^{13}\text{C}$  NMR (101 MHz,  $\text{CDCl}_3$ ):  $\delta$  169.15, 167.90 (s, C=O), 136.17, 133.90, 131.77, 127.80, 124.06 (s, Ph), 123.61 (s, =C), 122.93, 121.93, 120.67, 118.62 (s, Ph), 114.11 (s, =CH), 61.79 (d,  $J = 6.7$  Hz,  $\text{OCH}_2$ ), 61.67 (d,  $J = 6.7$  Hz,  $\text{OCH}_2$ ), 57.99 (d,  $J = 3.2$  Hz, N-C), 51.92 (s,  $\text{OCH}_3$ ), 35.04 (d,  $J = 142.0$  Hz,  $\text{CH}_2\text{P}$ ), 27.39 (s,  $\text{CH}_3$ ), 16.21 (d,  $J = 6.4$  Hz,  $\text{CH}_3$ ), 16.08 (d,  $J = 6.4$  Hz,  $\text{CH}_3$ );  $^{31}\text{P}$  NMR (162 MHz,  $\text{CDCl}_3$ ):  $\delta$  26.26 (s); ESI-HRMS calcd for  $[\text{C}_{25}\text{H}_{27}\text{N}_2\text{O}_7\text{P}, \text{M} + \text{Na}]^+$ : 521.1448, Found: 521.1442.

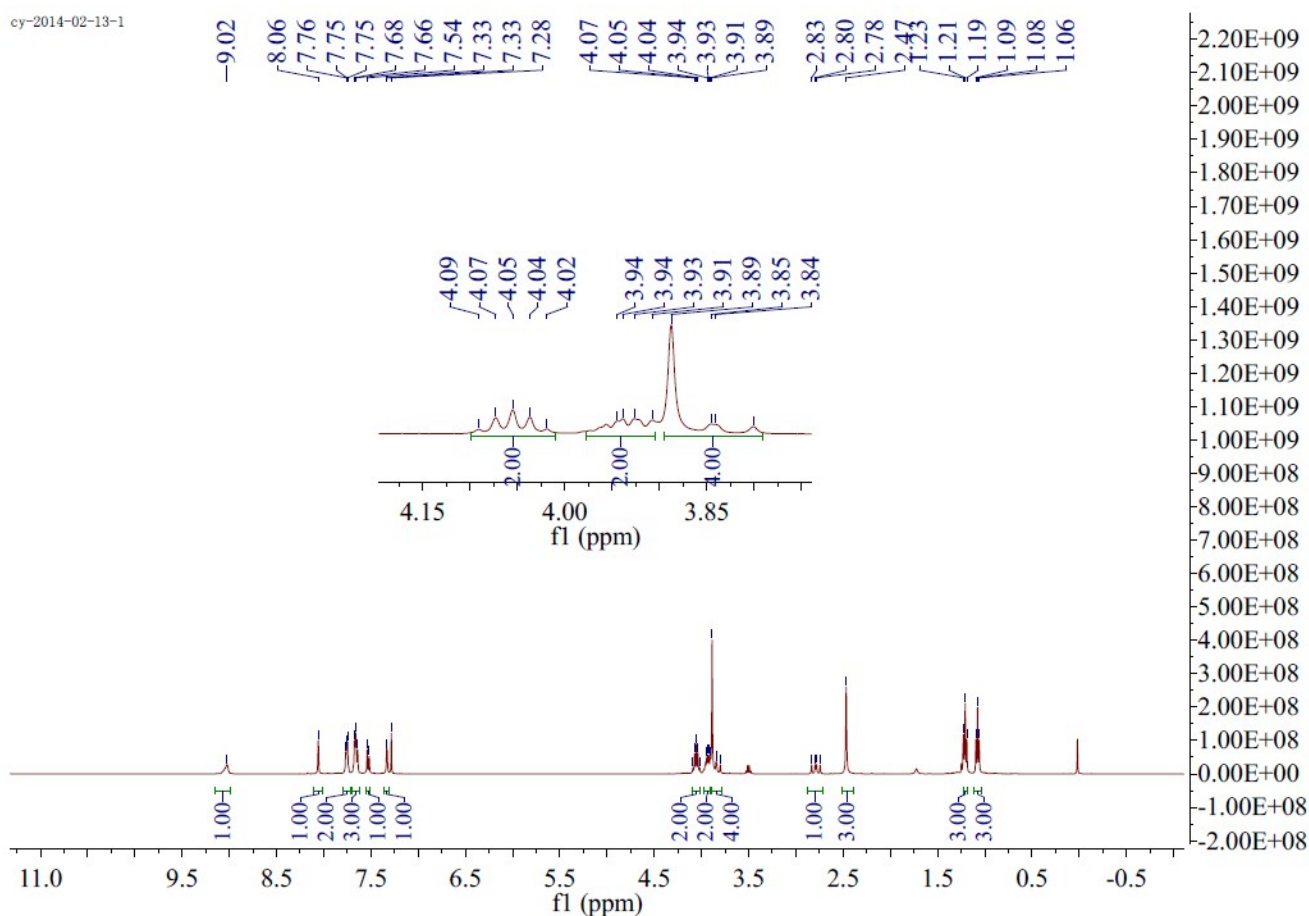

cy-2014-02-13-1  
13CPD

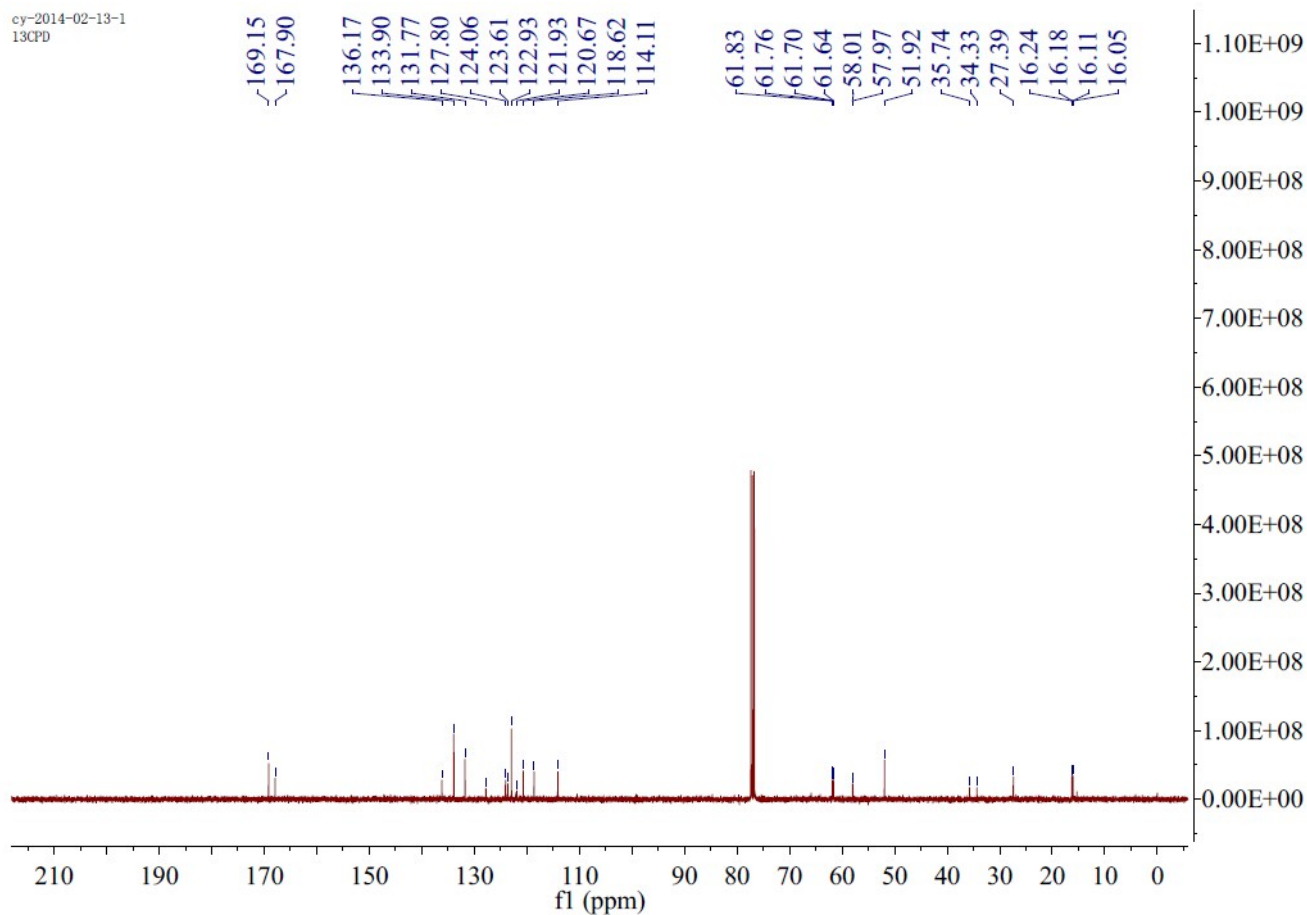

cy-2014-02-27-1  
31CPD

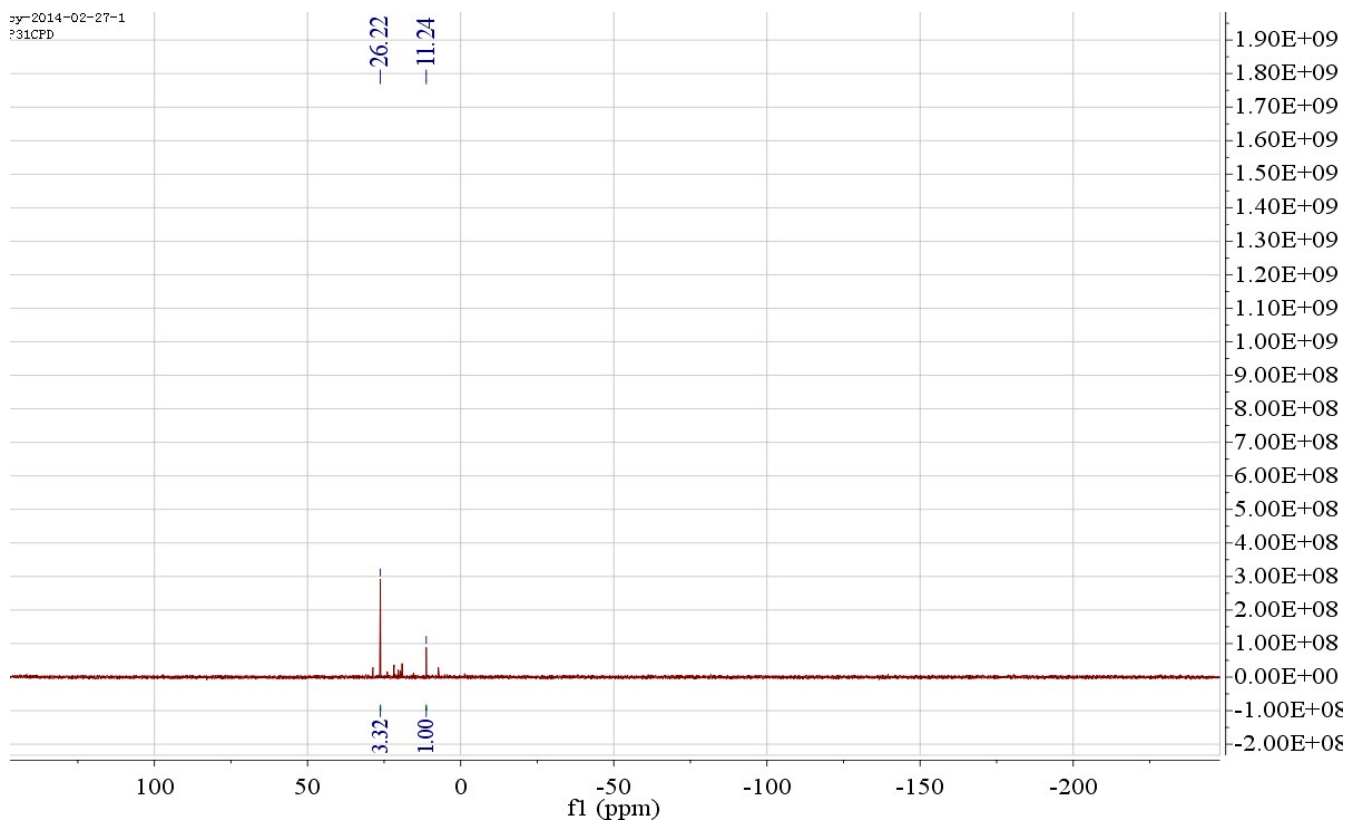

The mole ratio of **3h** and **4a** determined by crude <sup>31</sup>P NMR

**Diethyl (2-(1,3-dioxoisindolin-2-yl)-2-(7-methyl-1H-indol-3-yl)propyl)phosphonate (3i):**

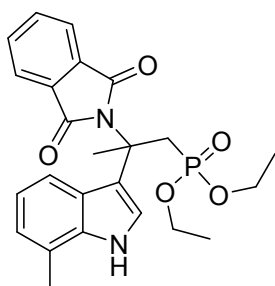

White solid; mp: 125-126 °C;  $^1\text{H}$  NMR (400 MHz,  $\text{CDCl}_3$ ):  $\delta$  8.51 (s, 1H, N-H), 7.70-7.81 (m, 2H), 7.59-7.68 (m, 2H, Ph), 7.36 (d,  $J = 6.0$  Hz, 1H, Ph), 7.16 (d,  $J = 2.1$  Hz, 1H, Ph), 6.82-6.95 (m, 2H, Ph, =CH), 3.84-4.16 (m, 5H,  $2\text{OCH}_2$ ,  $\text{CH}_2\text{P}$ ), 2.72 (dd,  $J = 20.7, 15.2$  Hz, 1H,  $\text{CH}_2\text{P}$ ), 2.48 (s, 3H,  $\text{CH}_3$ ), 2.24 (s, 3H,  $\text{CH}_3$ ), 1.20 (t,  $J = 7.0$  Hz, 3H,  $\text{CH}_3$ ), 1.12 (t,  $J = 7.0$  Hz, 3H,  $\text{CH}_3$ );

$^{13}\text{C}$  NMR (101 MHz,  $\text{CDCl}_3$ ):  $\delta$  169.32 (s, C=O), 136.35, 133.75, 131.92, 123.70, 122.83, 122.42 (s, Ph), 122.29 (s, =C), 121.06, 120.17, 119.87 (s, Ph), 116.75 (s, =CH), 61.75 (d,  $J = 6.7$  Hz,  $\text{OCH}_2$ ), 61.58 (d,  $J = 6.7$  Hz,  $\text{OCH}_2$ ), 58.16 (d,  $J = 4.4$  Hz, N-C), 34.92 (d,  $J = 141.3$  Hz,  $\text{CH}_2\text{P}$ ), 27.59 (s,  $\text{CH}_3$ ), 16.36 (d,  $J = 0.9$  Hz,  $\text{CH}_3$ ), 16.22 (d,  $J = 6.5$  Hz,  $\text{CH}_3$ ), 16.11 (d,  $J = 6.5$  Hz,  $\text{CH}_3$ );  $^{31}\text{P}$  NMR (162 MHz,  $\text{CDCl}_3$ ):  $\delta$  26.79 (s); ESI-HRMS calcd for  $[\text{C}_{24}\text{H}_{27}\text{N}_2\text{O}_5\text{P}, \text{M} + \text{Na}]^+$ : 477.1550, Found: 477.1549.

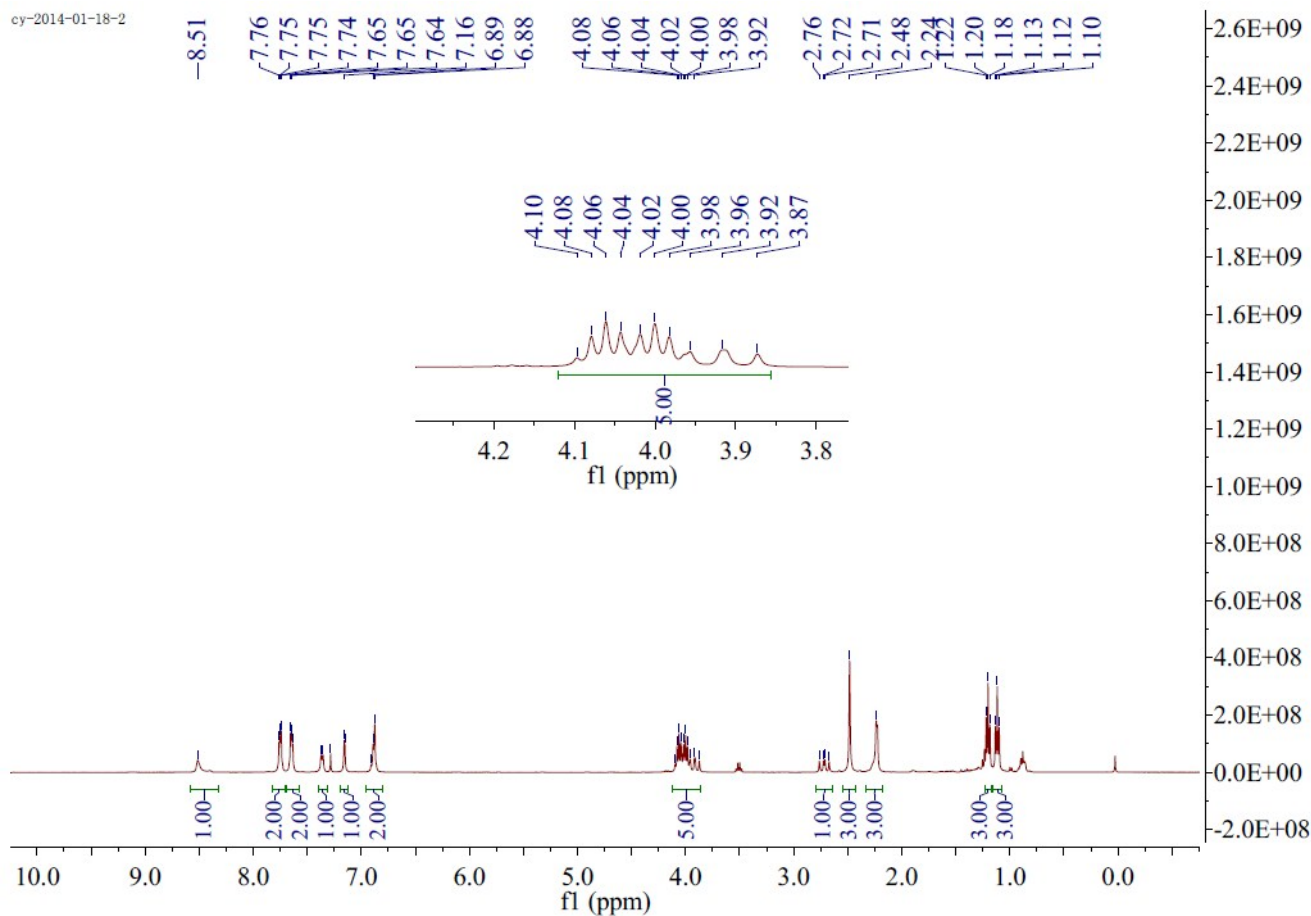

cy-2014-01-18-2  
13CPD

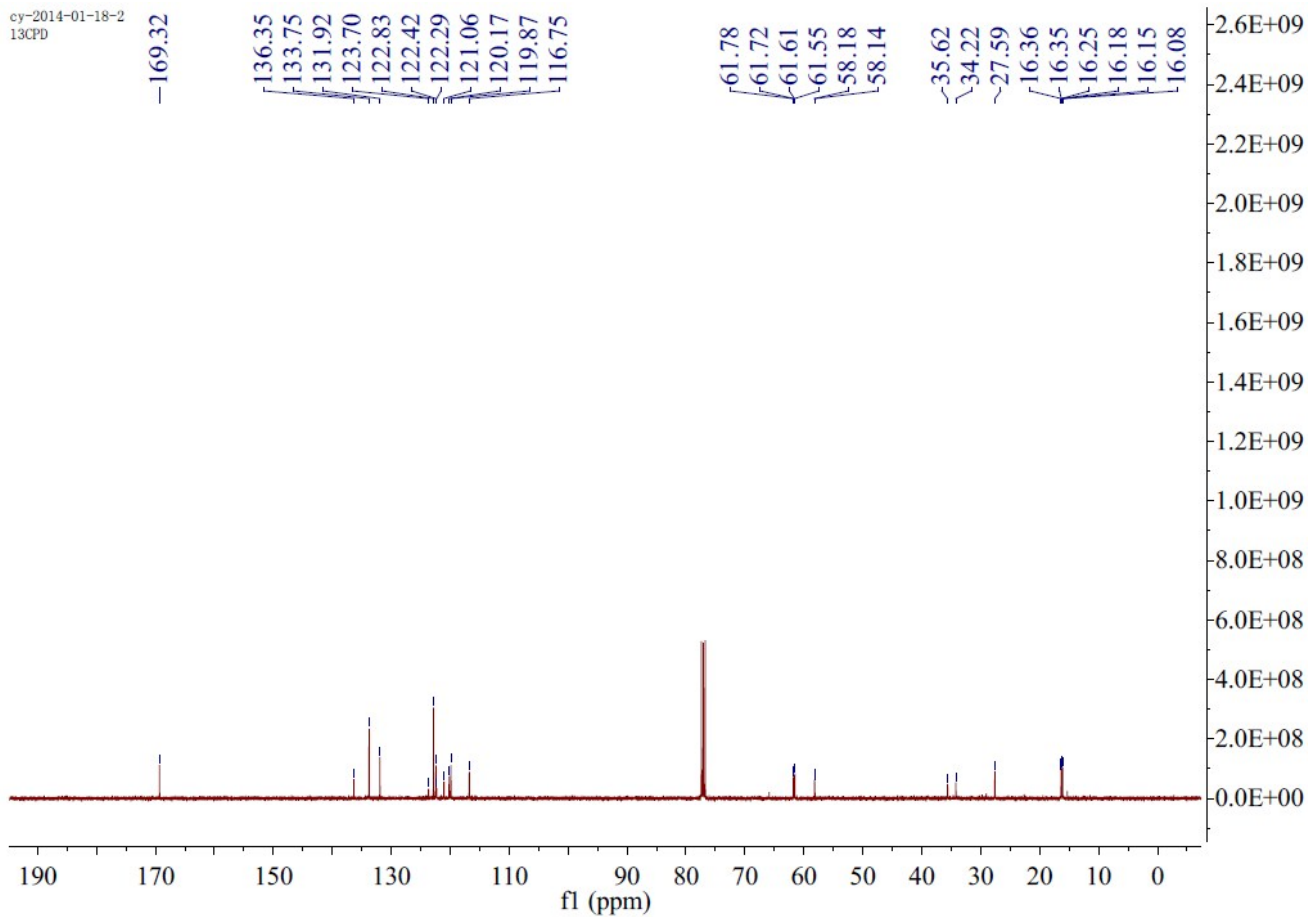

cy-2014-02-26-4  
31CPD

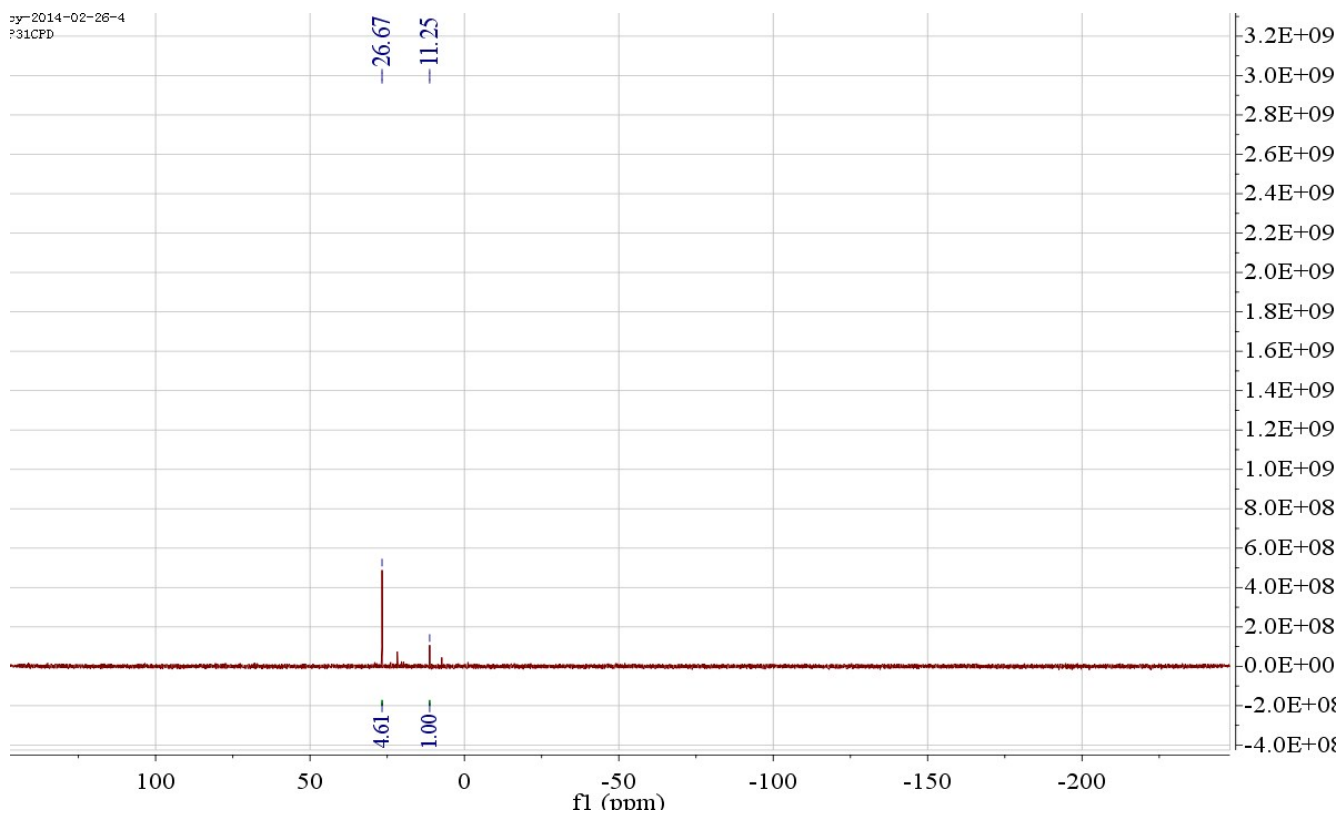

The mole ratio of **3i** and **4a** determined by crude <sup>31</sup>P NMR



**Diethyl (2-(7-bromo-1H-indol-3-yl)-2-(1,3-dioxoisindolin-2-yl)propyl)phosphonate (3j):**

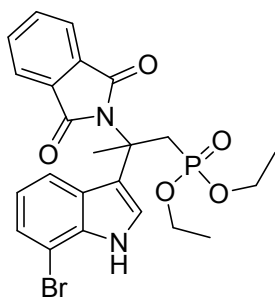

White solid; mp: 159-161 °C;  $^1\text{H}$  NMR (400 MHz,  $\text{CDCl}_3$ ):  $\delta$  8.55 (s, 1H, N-H), 7.73-7.83 (m, 2H, Ph), 7.59-7.71 (m, 2H, Ph), 7.48 (d,  $J = 8.0$  Hz, 1H, Ph), 7.28 (d,  $J = 6.3$  Hz, 1H, Ph), 7.25 (s, 1H, =CH), 6.87 (t,  $J = 7.8$  Hz, 1H, Ph), 3.94-4.10 (m, 4H,  $2\text{OCH}_2$ ), 3.82-3.93 (m, 1H,  $\text{CH}_2\text{P}$ ), 2.69 (dd,  $J = 20.7, 15.3$  Hz, 1H,  $\text{CH}_2\text{P}$ ), 2.46 (s, 3H,  $\text{CH}_3$ ), 1.18 (t,  $J = 7.0$  Hz, 3H,  $\text{CH}_3$ ), 1.11 (t,  $J =$

7.0 Hz, 3H,  $\text{CH}_3$ );  $^{13}\text{C}$  NMR (101 MHz,  $\text{CDCl}_3$ ):  $\delta$  169.15 (s,  $\text{C}=\text{O}$ ), 135.36, 133.83, 131.84, 125.49, 124.47, 123.47 (s, Ph), 123.31 (s, =C), 122.92, 120.98, 118.45 (s, Ph), 105.31 (s, =CH), 61.75 (d,  $J = 6.6$  Hz,  $\text{OCH}_2$ ), 61.62 (d,  $J = 6.6$  Hz,  $\text{OCH}_2$ ), 57.97 (d,  $J = 4.8$  Hz, N-C), 34.89 (d,  $J = 141.4$  Hz,  $\text{CH}_2\text{P}$ ), 27.53 (s,  $\text{CH}_3$ ), 16.19 (d,  $J = 6.8$  Hz,  $\text{CH}_3$ ), 16.11 (d,  $J = 6.8$  Hz,  $\text{CH}_3$ );  $^{31}\text{P}$  NMR (162 MHz,  $\text{CDCl}_3$ ):  $\delta$  26.33 (s); ESI-HRMS calcd for  $[\text{C}_{23}\text{H}_{24}\text{BrN}_2\text{O}_5\text{P}, \text{M} + \text{Na}]^+$ : 541.0498, Found: 541.0492.

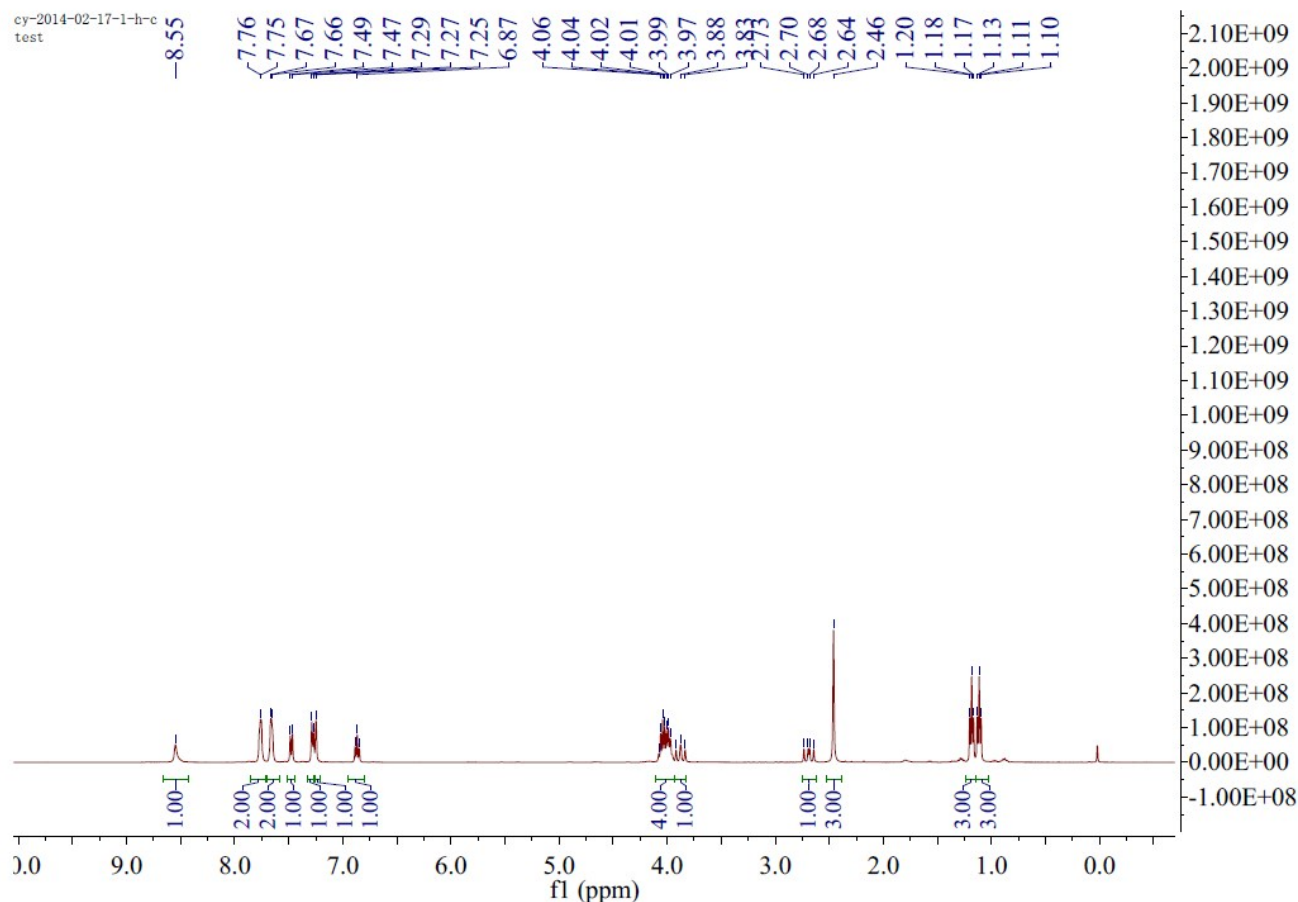

cy-2014-02-17-1-h-c  
test

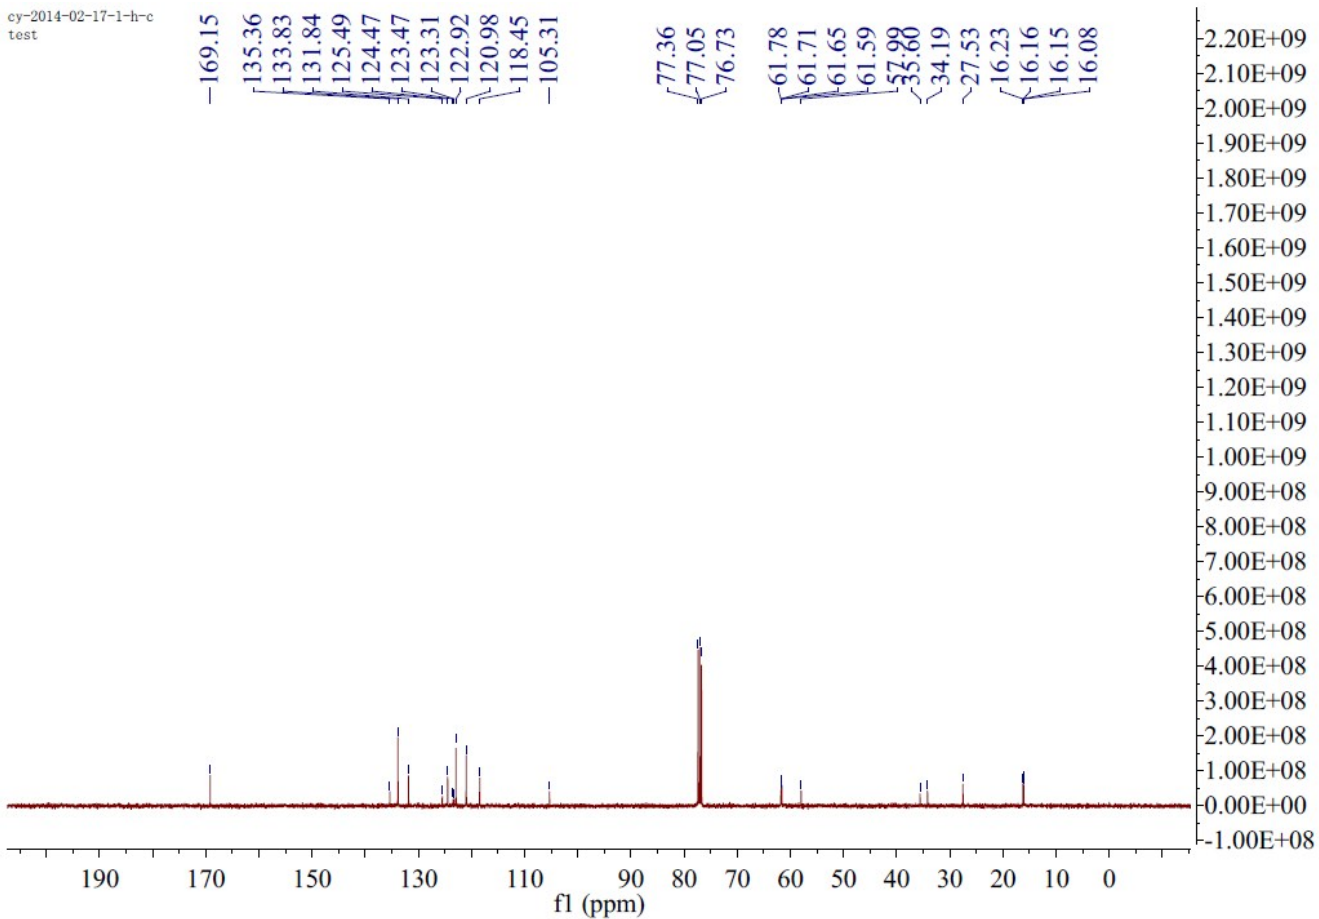

cy-2014-02-26-6  
331CPD

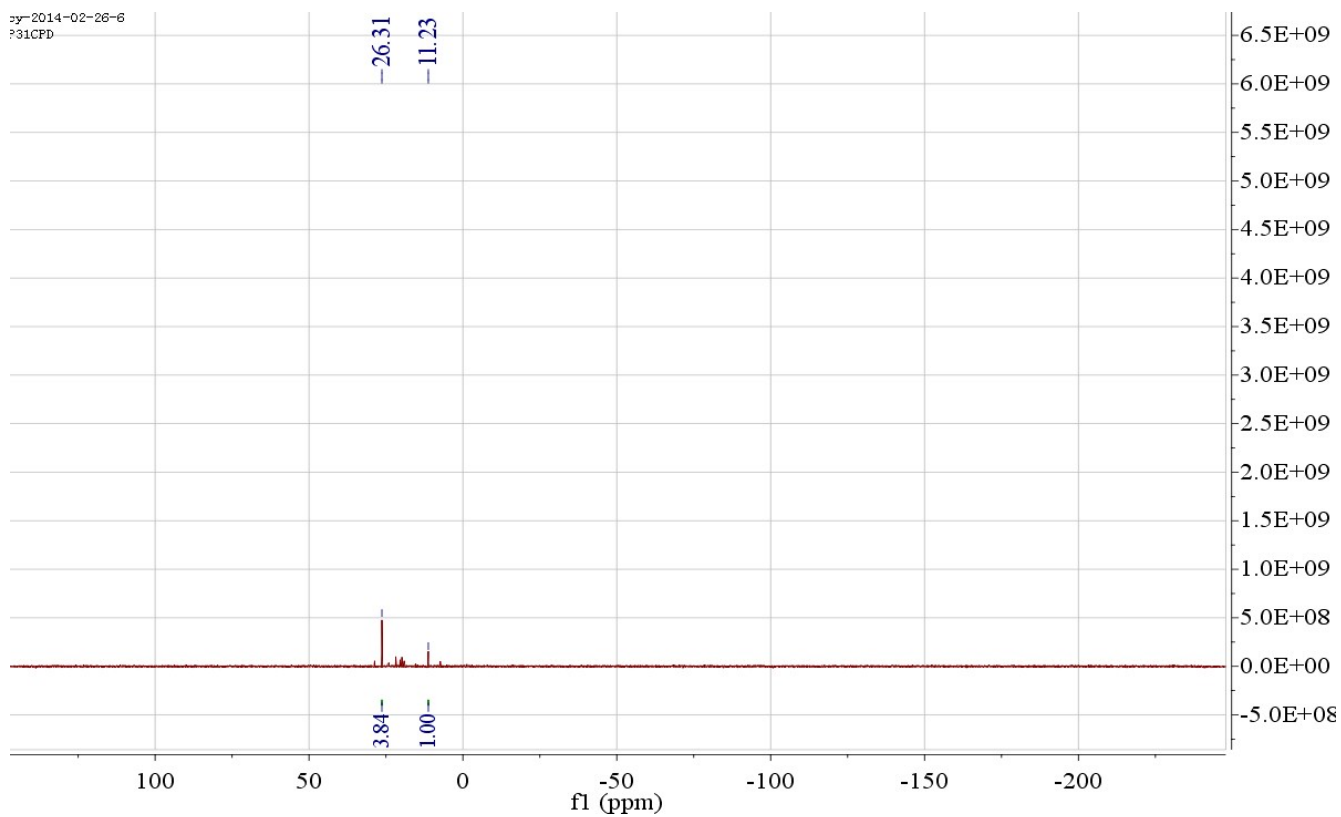

The mole ratio of **3j** and **4a** determined by crude <sup>31</sup>P NMR

### Diethyl (2-(1,3-dioxisoindolin-2-yl)-2-(7-nitro-1H-indol-3-yl)propyl)phosphonate (3k):

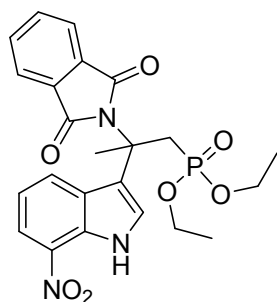

Yellow solid; mp: 178-179 °C;  $^1\text{H}$  NMR (400 MHz,  $\text{CDCl}_3$ ):  $\delta$  9.92 (s, 1H, N-H), 8.12 (d,  $J = 8.0$  Hz, 1H, Ph), 7.90 (d,  $J = 8.0$  Hz, 1H, Ph), 7.75-7.81 (m, 2H, Ph), 7.66-7.73 (m, 2H, Ph), 7.40 (d,  $J = 2.3$  Hz, 1H, =CH), 7.10 (t,  $J = 8.0$  Hz, 1H, Ph), 3.96-4.09 (m, 4H,  $2\text{OCH}_2$ ), 3.85 (dd,  $J = 21.0, 15.1$  Hz, 1H,  $\text{CH}_2\text{P}$ ), 2.69 (dd,  $J = 21.0, 15.1$  Hz, 1H,  $\text{CH}_2\text{P}$ ), 2.47 (s, 3H,  $\text{CH}_3$ ), 1.18 (t,  $J = 7.1$  Hz,

3H,  $\text{CH}_3$ ), 1.14 (t,  $J = 7.1$  Hz, 3H,  $\text{CH}_3$ );  $^{13}\text{C}$  NMR (101 MHz,  $\text{CDCl}_3$ ):  $\delta$  169.09 (s, C=O), 134.01, 133.19, 131.74, 130.18, 128.22, 127.23, 123.95 (s, Ph), 123.78 (s, =C), 123.02, 122.72 (s, Ph), 119.41 (s, =CH), 61.78 (d,  $J = 7.4$  Hz,  $\text{OCH}_2$ ), 61.71 (d,  $J = 7.4$  Hz,  $\text{OCH}_2$ ), 57.51 (d,  $J = 4.2$  Hz, N-C), 34.97 (d,  $J = 142.0$  Hz,  $\text{CH}_2\text{P}$ ), 27.77 (s,  $\text{CH}_3$ ), 16.19 (d,  $J = 3.1$  Hz,  $\text{CH}_3$ ), 16.13 (d,  $J = 3.1$  Hz,  $\text{CH}_3$ );  $^{31}\text{P}$  NMR (162 MHz,  $\text{CDCl}_3$ ):  $\delta$  25.81 (s); ESI-HRMS calcd for  $[\text{C}_{23}\text{H}_{24}\text{N}_3\text{O}_7\text{P}, \text{M} + \text{Na}]^+$ : 508.1244, Found: 508.1237.

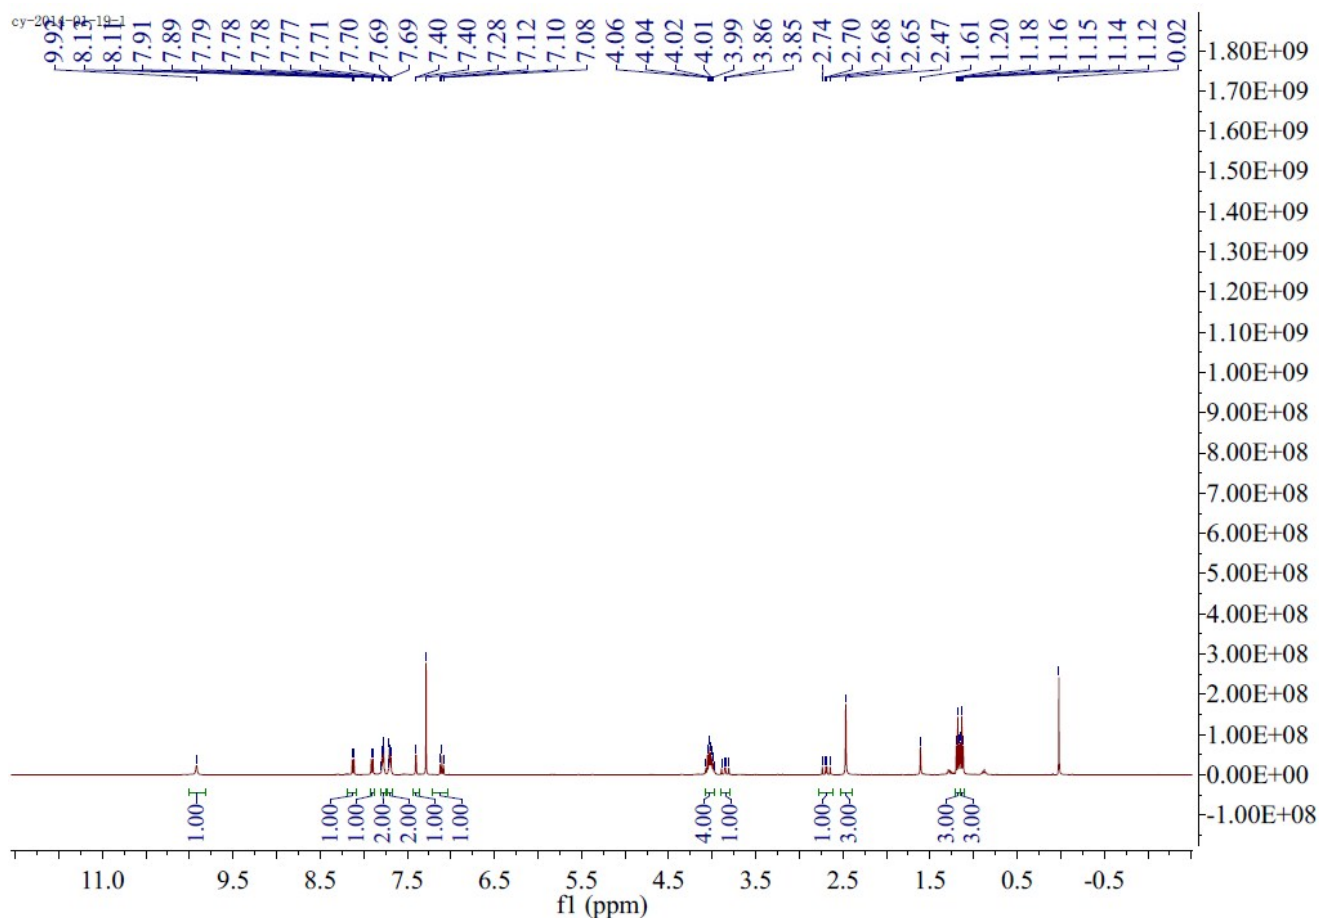

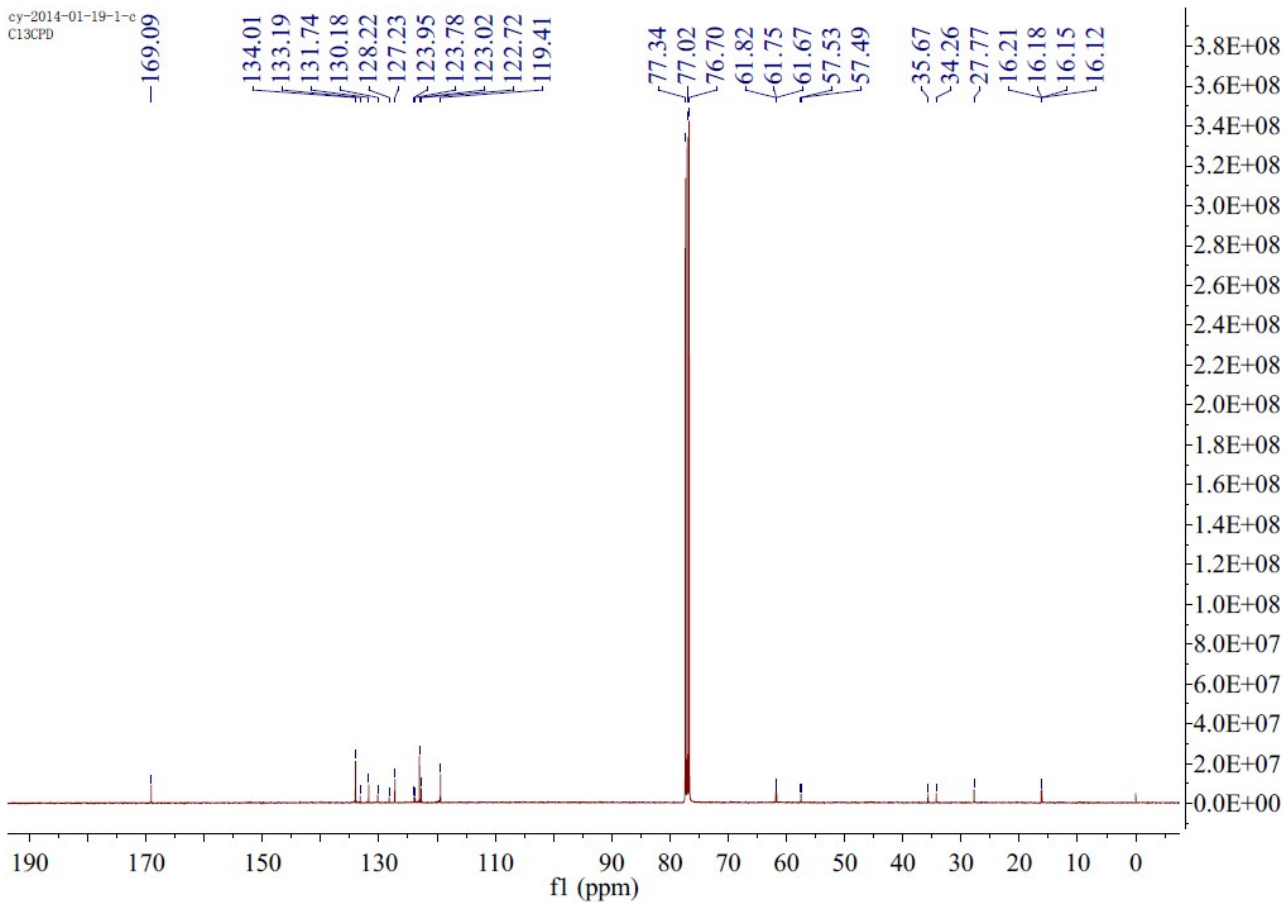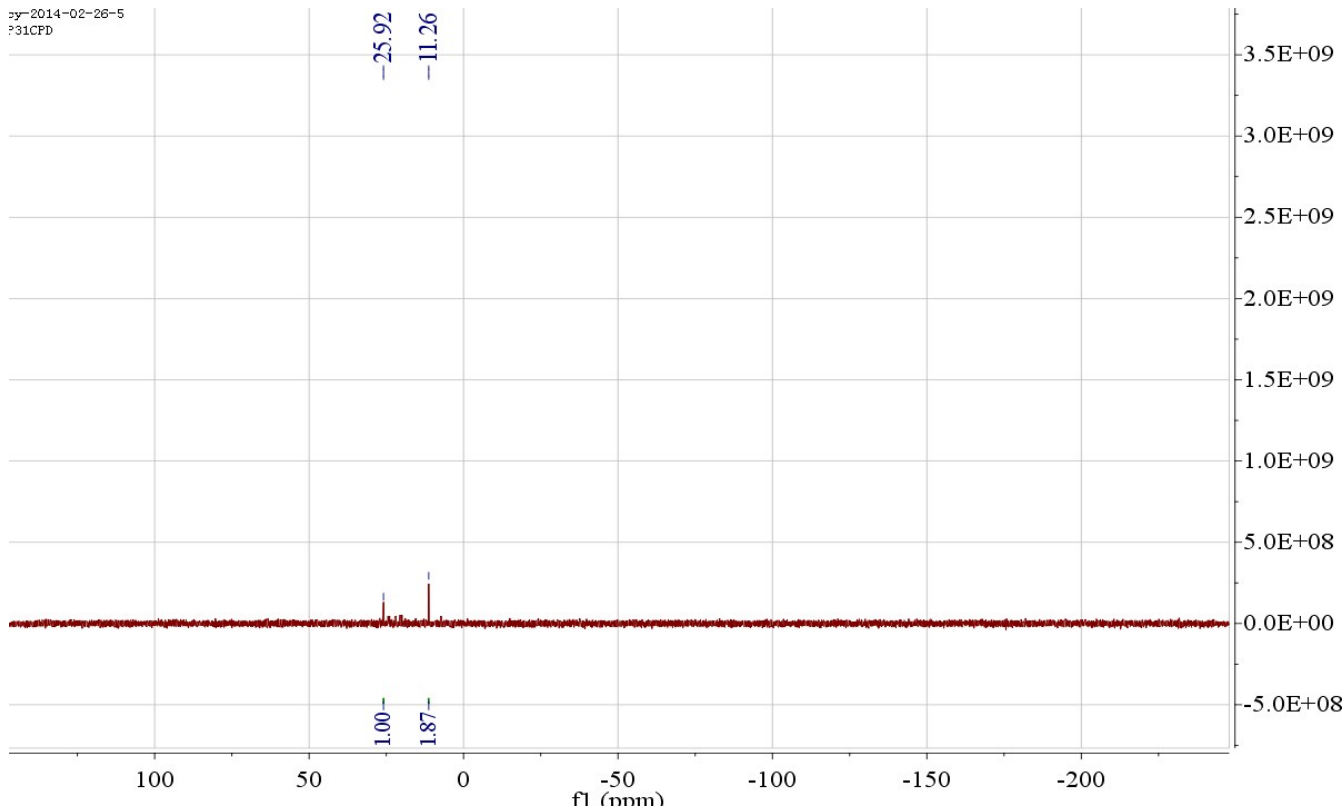

The mole ratio of **3k** and **4a** determined by crude  $^{31}\text{P}$  NMR

### Dimethyl (2-(1,3-dioxoisindolin-2-yl)-2-(1H-indol-3-yl)propyl)phosphonate (3m):

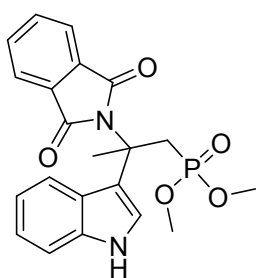

Brown oil;  $^1\text{H}$  NMR (400 MHz,  $\text{CDCl}_3$ ):  $\delta$  8.63 (s, 1H, N-H), 7.72-7.80 (m, 2H, Ph), 7.60-7.67 (m, 2H, Ph), 7.54 (d,  $J = 8.0$  Hz, 1H, Ph), 7.34 (d,  $J = 8.0$  Hz, 1H, Ph), 7.09-7.16 (m, 2H, Ph, =CH), 6.99 (t,  $J = 7.5$  Hz, 1H, Ph), 3.87-3.99 (m, 1H,  $\text{CH}_2\text{P}$ ), 3.67 (d,  $J = 11.0$  Hz, 3H,  $\text{OCH}_3$ ), 3.59 (d,  $J = 11.0$  Hz, 3H,  $\text{OCH}_3$ ), 2.74 (dd,  $J = 20.7, 15.3$  Hz, 1H,  $\text{CH}_2\text{P}$ ), 2.47 (s, 3H,  $\text{CH}_3$ );  $^{13}\text{C}$  NMR (101 MHz,  $\text{CDCl}_3$ ):  $\delta$  169.27 (s, C=O), 136.85, 133.79, 131.81, 123.50, 122.88, 121.97 (s, Ph), 121.58 (s, =C), 120.63, 119.69, 119.16 (s, Ph), 111.78 (s, =CH), 58.04 (d,  $J = 3.8$  Hz, N-C), 52.42 (d,  $J = 6.8$  Hz,  $\text{OCH}_3$ ), 52.30 (d,  $J = 6.8$  Hz,  $\text{OCH}_3$ ), 34.10 (d,  $J = 141.5$  Hz,  $\text{CH}_2\text{P}$ ), 27.47 (s,  $\text{CH}_3$ );  $^{31}\text{P}$  NMR (162 MHz,  $\text{CDCl}_3$ ):  $\delta$  29.41 (s); ESI-HRMS calcd for  $[\text{C}_{21}\text{H}_{21}\text{N}_2\text{O}_5\text{P}, \text{M} + \text{Na}]^+$ : 435.1080, Found: 435.1081.

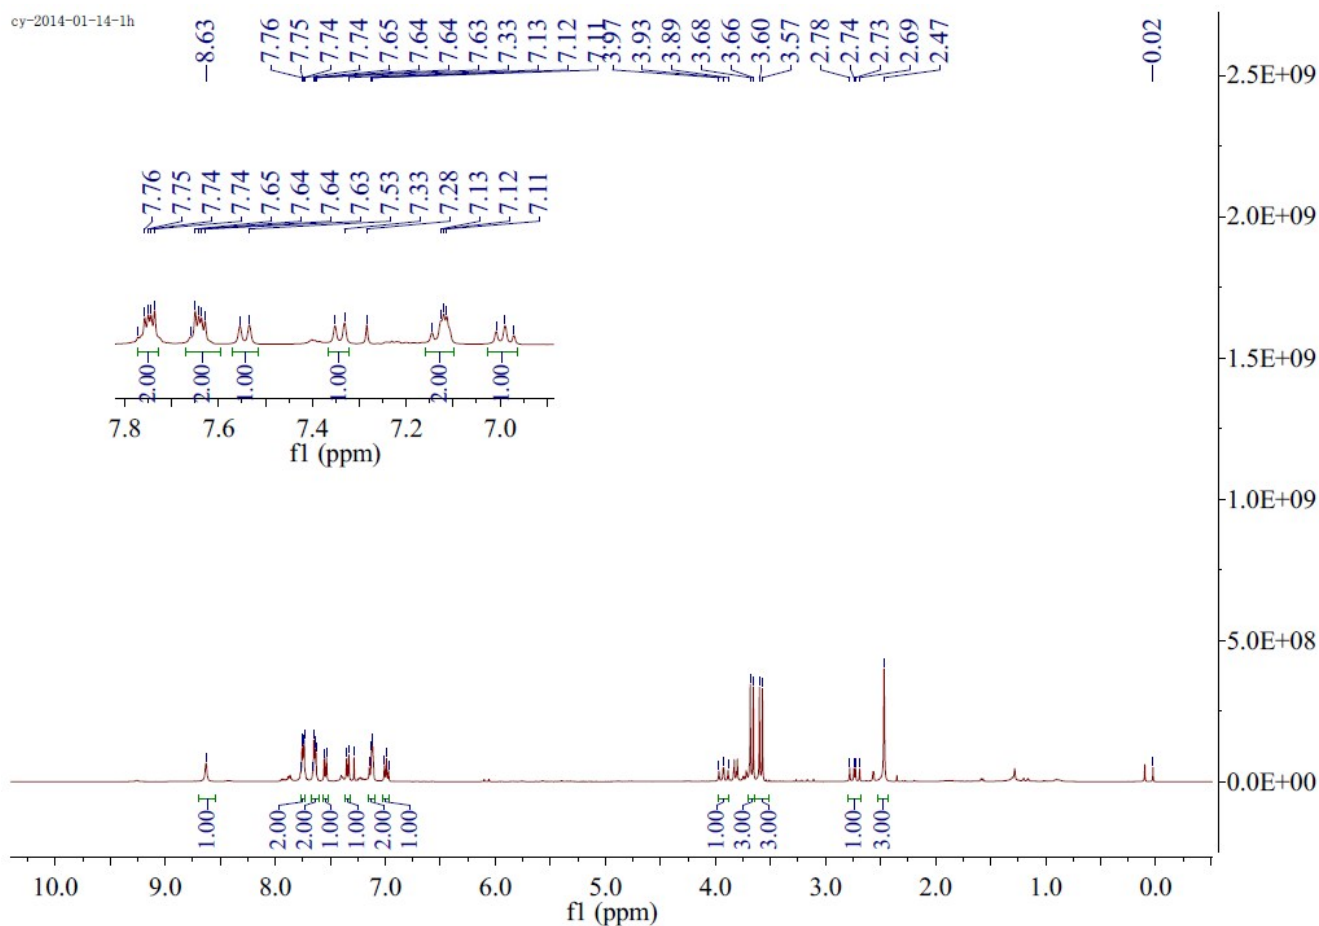

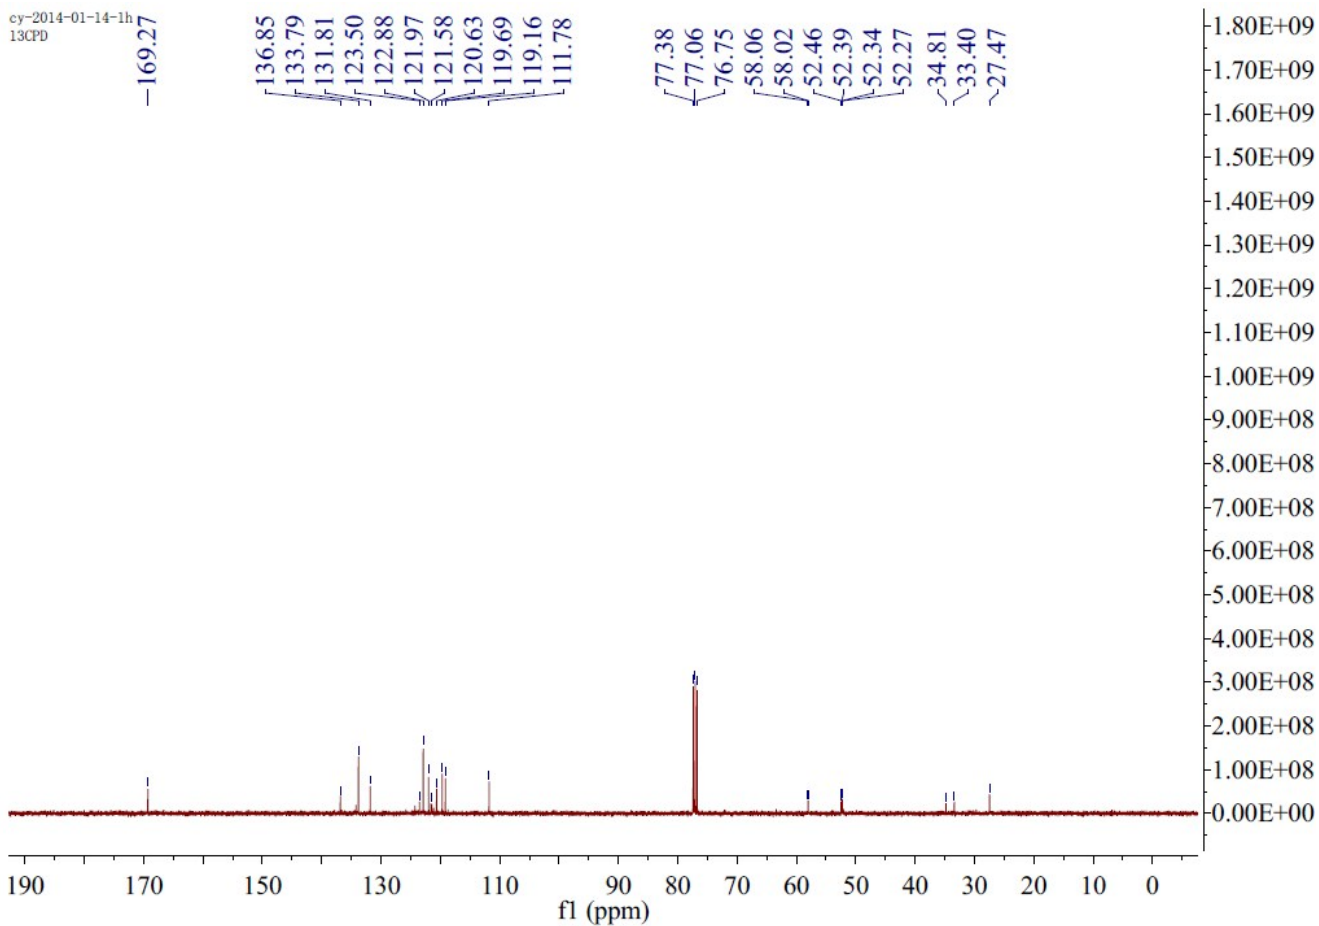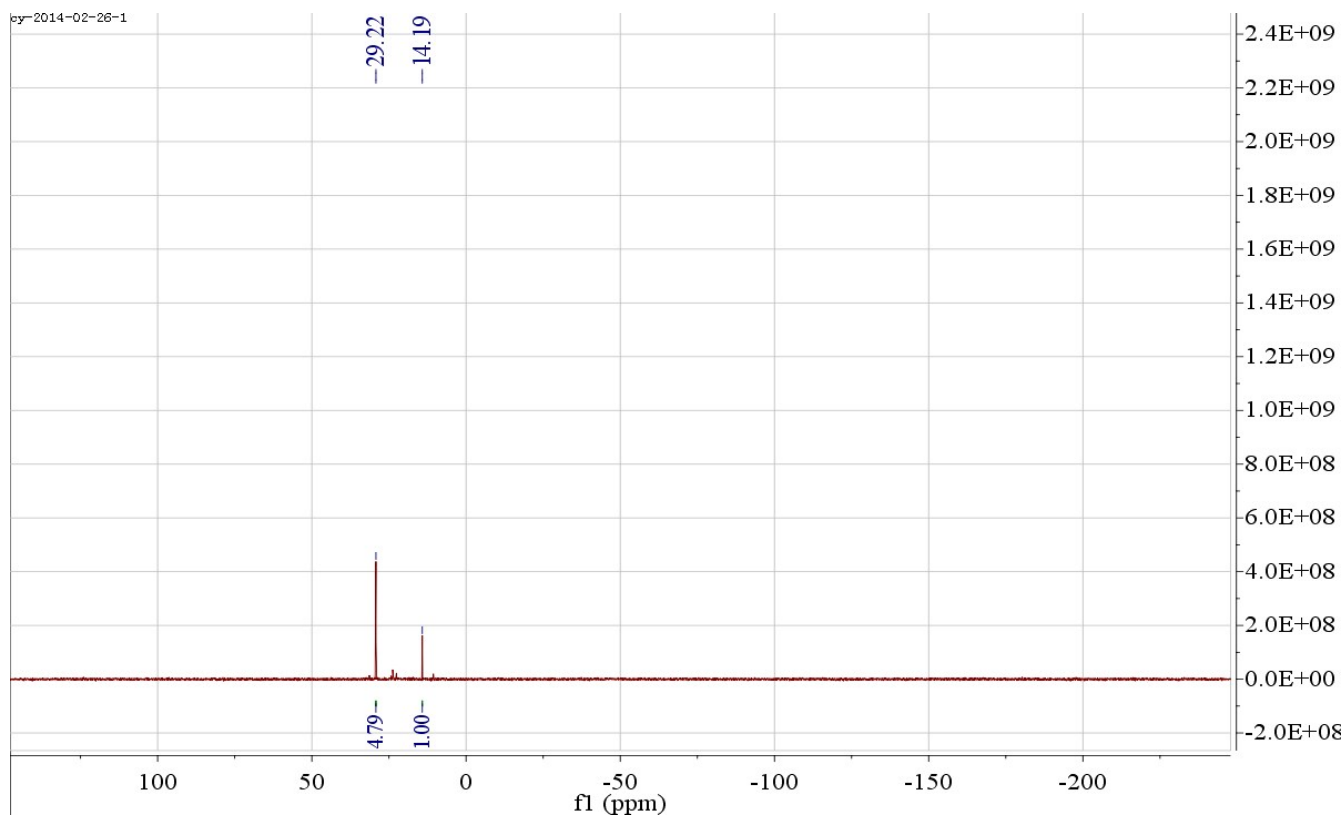

The mole ratio of **3m** and **4m** determined by crude  $^{31}\text{P}$  NMR

### Diisopropyl (2-(1,3-dioxoisindolin-2-yl)-2-(1H-indol-3-yl)propyl)phosphonate (3n):

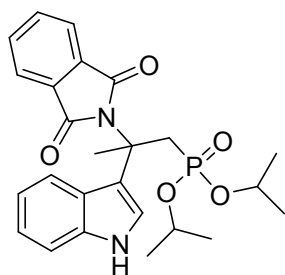

Brown oil;  $^1\text{H}$  NMR (400 MHz,  $\text{CDCl}_3$ ):  $\delta$  8.57 (s, 1H, N-H), 7.71-7.79 (m, 2H, Ph), 7.61-7.67 (m, 2H, Ph), 7.56 (d,  $J = 8.1$  Hz, 1H, Ph), 7.34 (d,  $J = 8.1$  Hz, 1H, Ph), 7.08-7.17 (m, 2H, Ph, =CH), 6.99 (t,  $J = 7.5$  Hz, 1H, Ph), 4.63-4.74 (m, 2H, 2OCH), 3.89 (dd,  $J = 17.7, 15.6$  Hz, 1H,  $\text{OCH}_2\text{P}$ ), 2.61 (dd,  $J = 17.7, 15.6$  Hz, 1H,  $\text{OCH}_2\text{P}$ ), 2.49 (s, 3H,  $\text{CH}_3$ ), 1.15-1.25 (m, 12H, 4 $\text{CH}_3$ );  $^{13}\text{C}$  NMR (101 MHz,  $\text{CDCl}_3$ ):  $\delta$  169.28 (s, C=O), 136.86, 133.66, 132.04, 123.50, 122.80 (s, Ph), 122.16 (s, =C), 121.89, 120.42, 119.61, 119.29 (s, Ph), 111.73 (s, =CH), 70.35 (d,  $J = 6.9$  Hz, OCH), 70.23 (d,  $J = 6.9$  Hz, OCH), 58.14 (d,  $J = 5.0$  Hz, N-C), 36.32 (d,  $J = 142.1$  Hz,  $\text{CH}_2\text{P}$ ), 27.72 (s,  $\text{CH}_3$ ), 23.99 (d,  $J = 4.1$  Hz,  $\text{CH}_3$ ), 23.88 (d,  $J = 4.1$  Hz,  $\text{CH}_3$ ), 23.83 (d,  $J = 4.1$  Hz,  $\text{CH}_3$ ).  $^{31}\text{P}$  NMR (162 MHz,  $\text{CDCl}_3$ ):  $\delta$  24.94 (s); ESI-HRMS calcd for  $[\text{C}_{25}\text{H}_{29}\text{N}_2\text{O}_5\text{P}, \text{M} + \text{Na}]^+$ : 491.1706, Found: 491.1705.

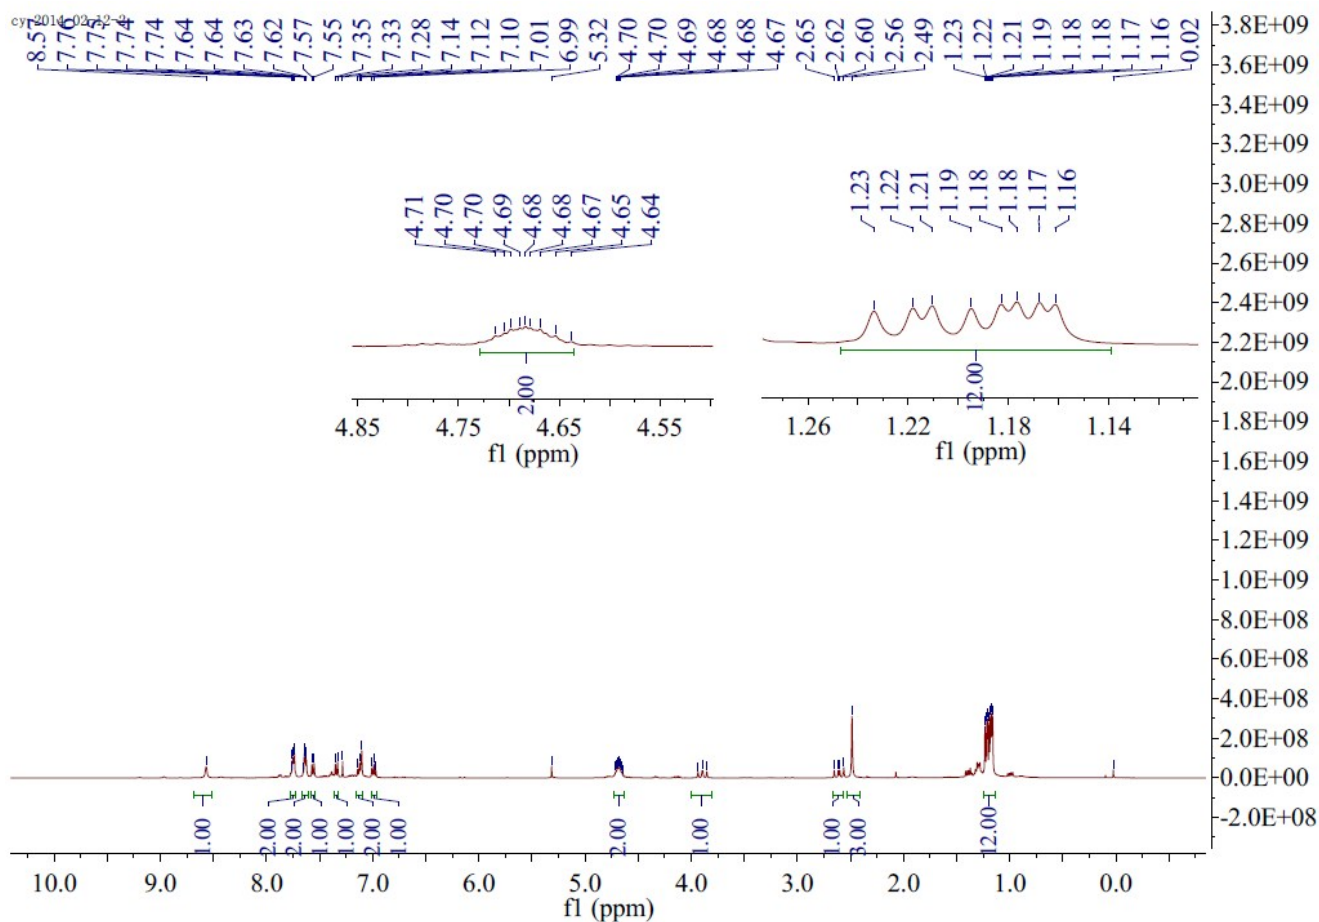

cy-2014-02-12-2  
13CPD

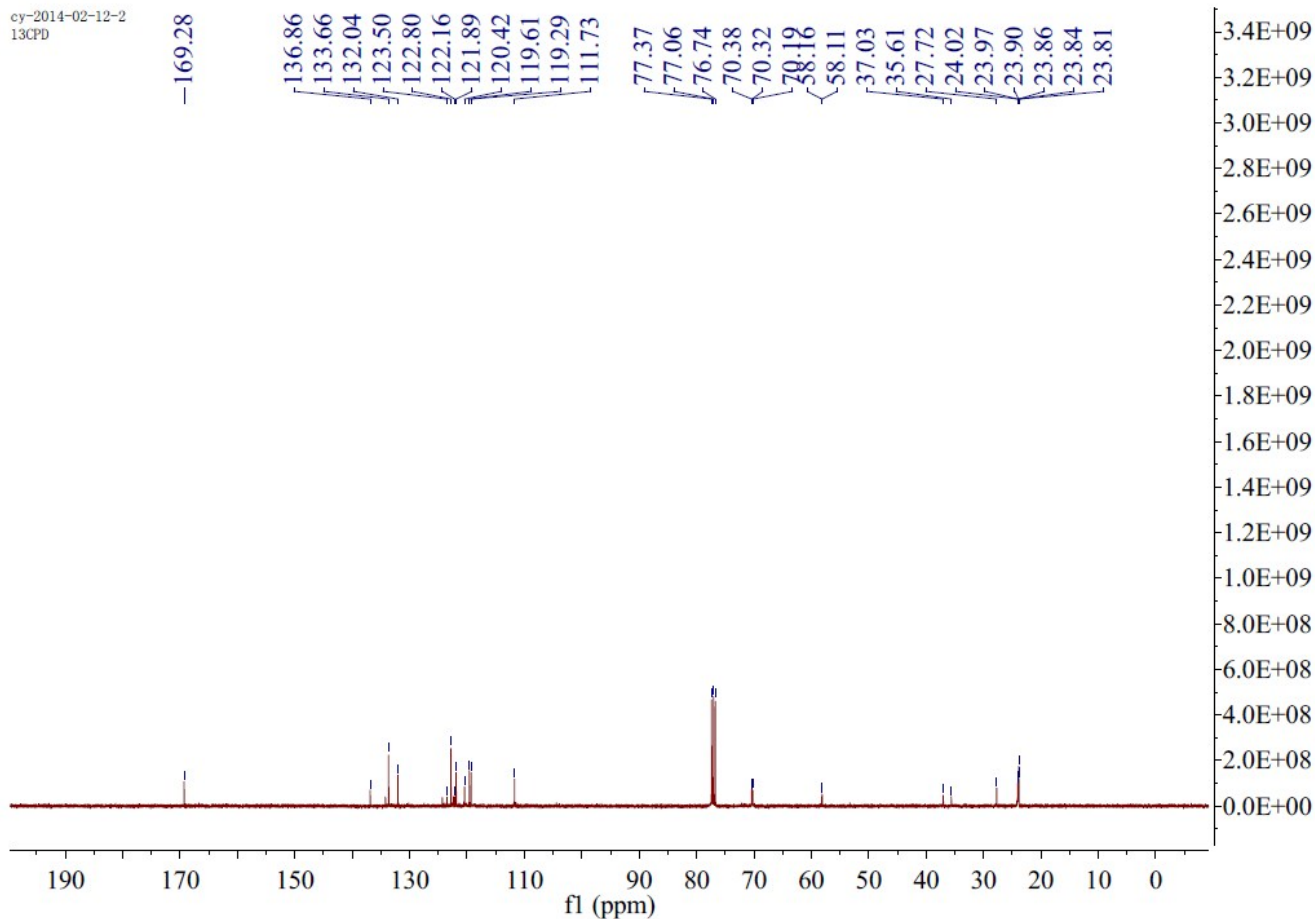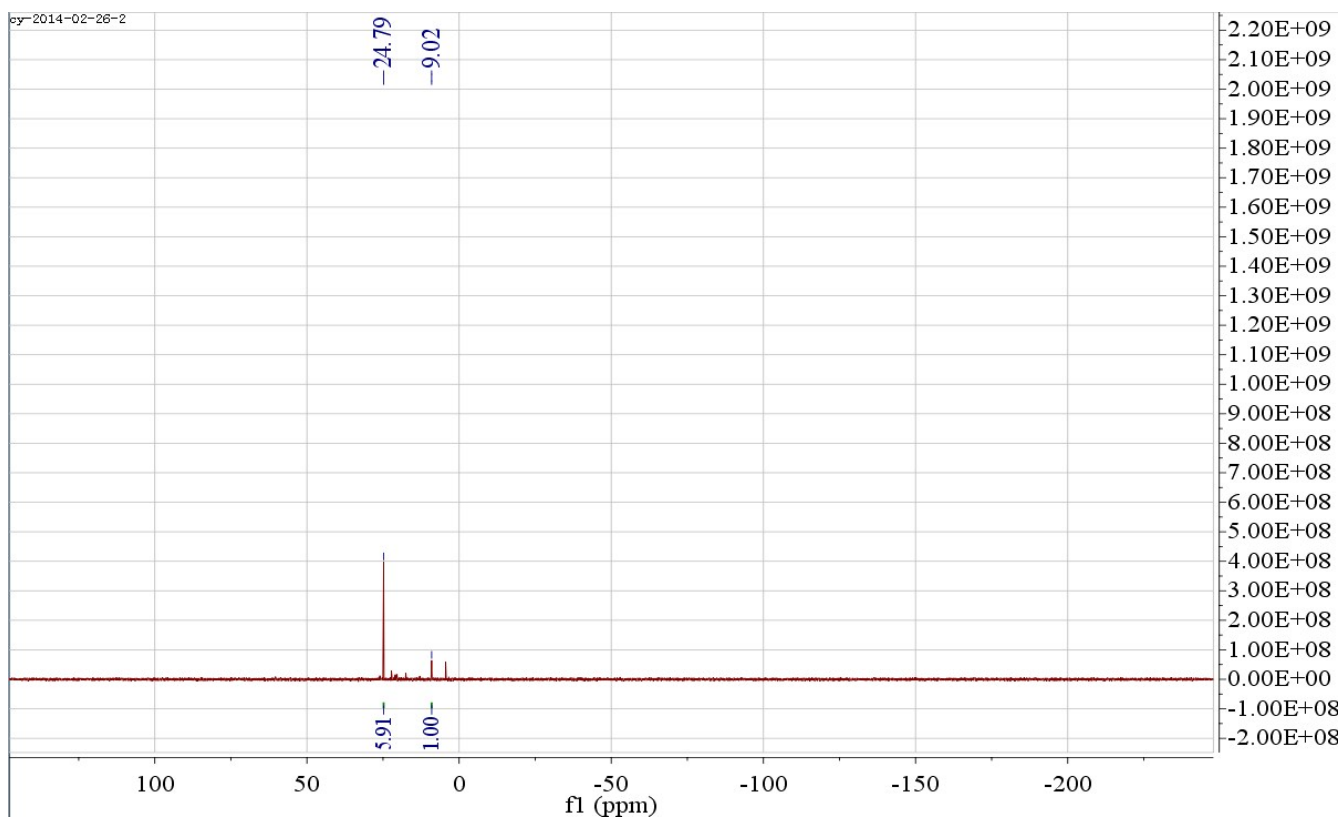

The mole ratio of **3n** and **4n** determined by crude  $^{31}\text{P}$  NMR



### Dibutyl (2-(1,3-dioxisoindolin-2-yl)-2-(1H-indol-3-yl)propyl)phosphonate (3o):

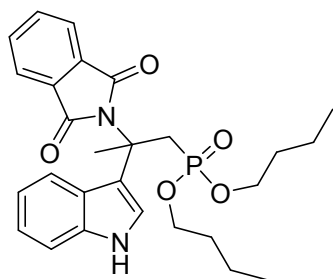

Brown oil;  $^1\text{H}$  NMR (400 MHz,  $\text{CDCl}_3$ ):  $\delta$  8.64 (s, 1H, N-H), 7.71-7.77 (m, 2H, Ph), 7.62-7.66 (m, 2H, Ph), 7.54 (d,  $J = 8.1$  Hz, 1H, Ph), 7.34 (d,  $J = 8.1$  Hz, 1H, Ph), 7.09-7.15 (m, 2H, Ph, =CH), 6.98 (t,  $J = 7.4$  Hz, 1H, Ph), 4.06-4.17 (m, 1H,  $\text{CH}_2\text{P}$ ), 3.95-4.02 (m, 2H,  $\text{OCH}_2$ ), 3.87-3.94 (m, 2H,  $\text{OCH}_2$ ), 2.71 (dd,  $J = 20.7, 15.2$  Hz, 1H,  $\text{CH}_2\text{P}$ ), 2.48 (s, 3H,  $\text{CH}_3$ ), 1.47-1.55 (m, 2H,  $\text{CH}_2$ ), 1.37-1.45 (m, 2H,  $\text{CH}_2$ ), 1.22-1.36 (m, 4H,  $2\text{CH}_2$ ), 0.85 (dd,  $J = 16.1, 7.5$  Hz, 6H,  $2\text{CH}_3$ );  $^{13}\text{C}$  NMR (101 MHz,  $\text{CDCl}_3$ ):  $\delta$  169.22 (s, C=O), 136.87, 133.70, 131.93, 124.29, 122.85, 121.89 (s, Ph), 121.66 (s, =C), 120.63, 119.63, 119.18 (s, Ph), 111.77 (s, =CH), 65.51 (d,  $J = 6.8$  Hz,  $\text{OCH}_2$ ), 65.38 (d,  $J = 6.8$  Hz,  $\text{OCH}_2$ ), 58.14 (d,  $J = 4.3$  Hz, N-C), 34.83 (d,  $J = 140.5$  Hz,  $\text{CH}_2\text{P}$ ), 32.40 (d,  $J = 6.0$  Hz,  $\text{CH}_2$ ), 32.35 (d,  $J = 6.0$  Hz,  $\text{CH}_2$ ), 27.54 (s,  $\text{CH}_3$ ), 18.67 (d,  $J = 6.2$  Hz,  $\text{CH}_2$ ), 13.59 (s,  $\text{CH}_3$ );  $^{31}\text{P}$  NMR (162 MHz,  $\text{CDCl}_3$ ):  $\delta$  26.90 (s); ESI-HRMS calcd for  $[\text{C}_{27}\text{H}_{33}\text{N}_2\text{O}_5\text{P}, \text{M} + \text{Na}]^+$ : 519.2019, Found: 519.2023.

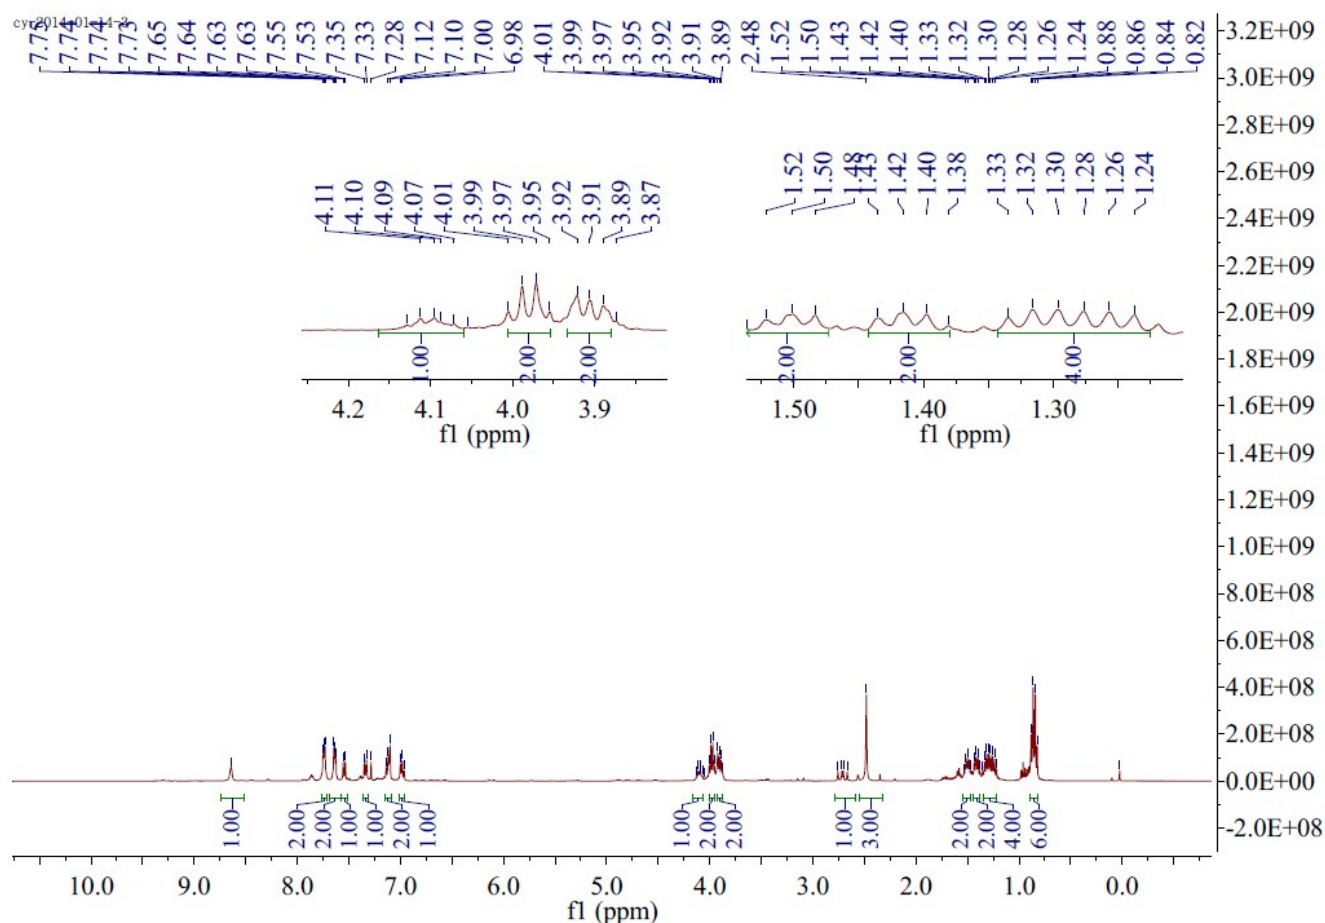

cy-2014-01-14-3  
13CPD

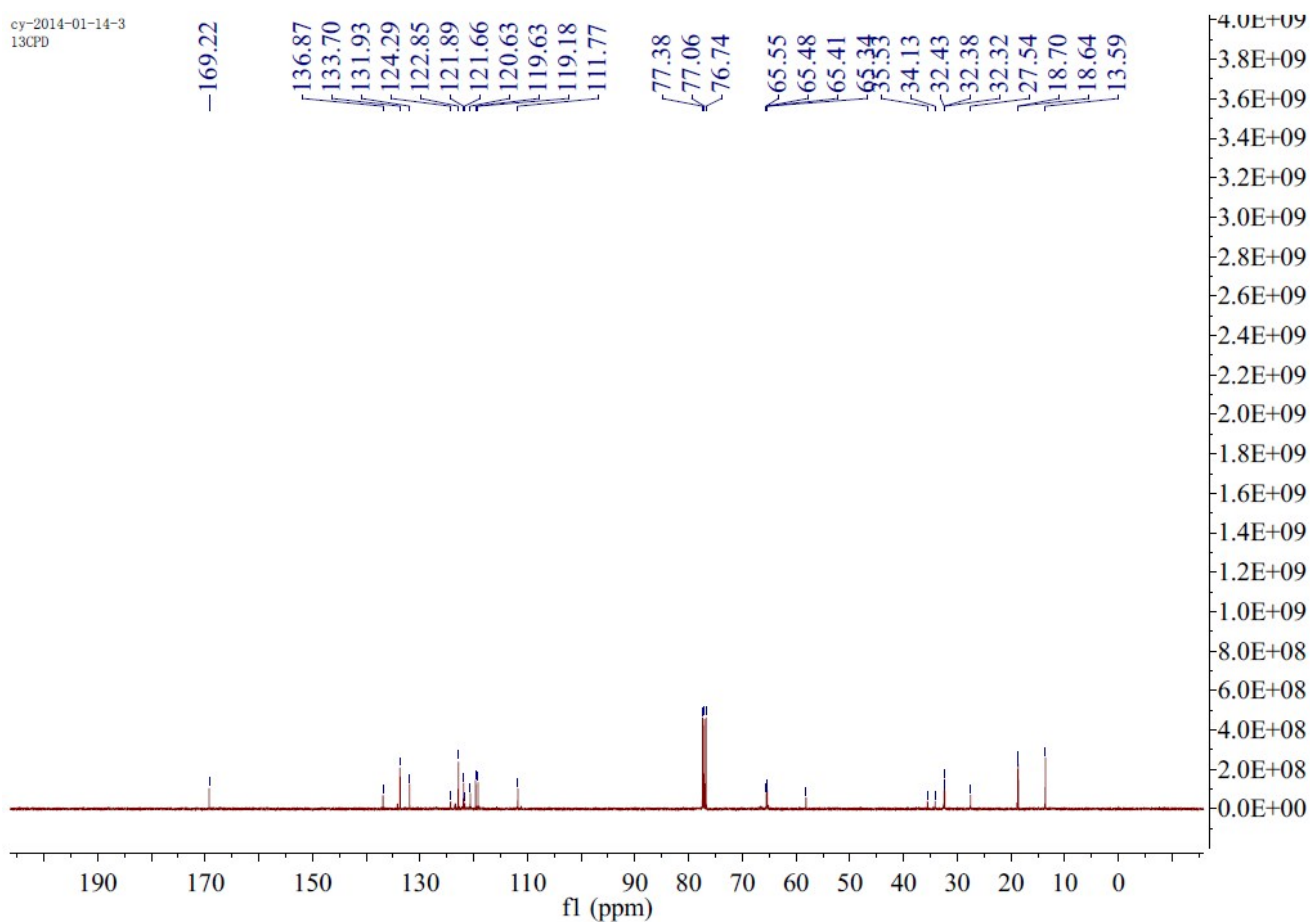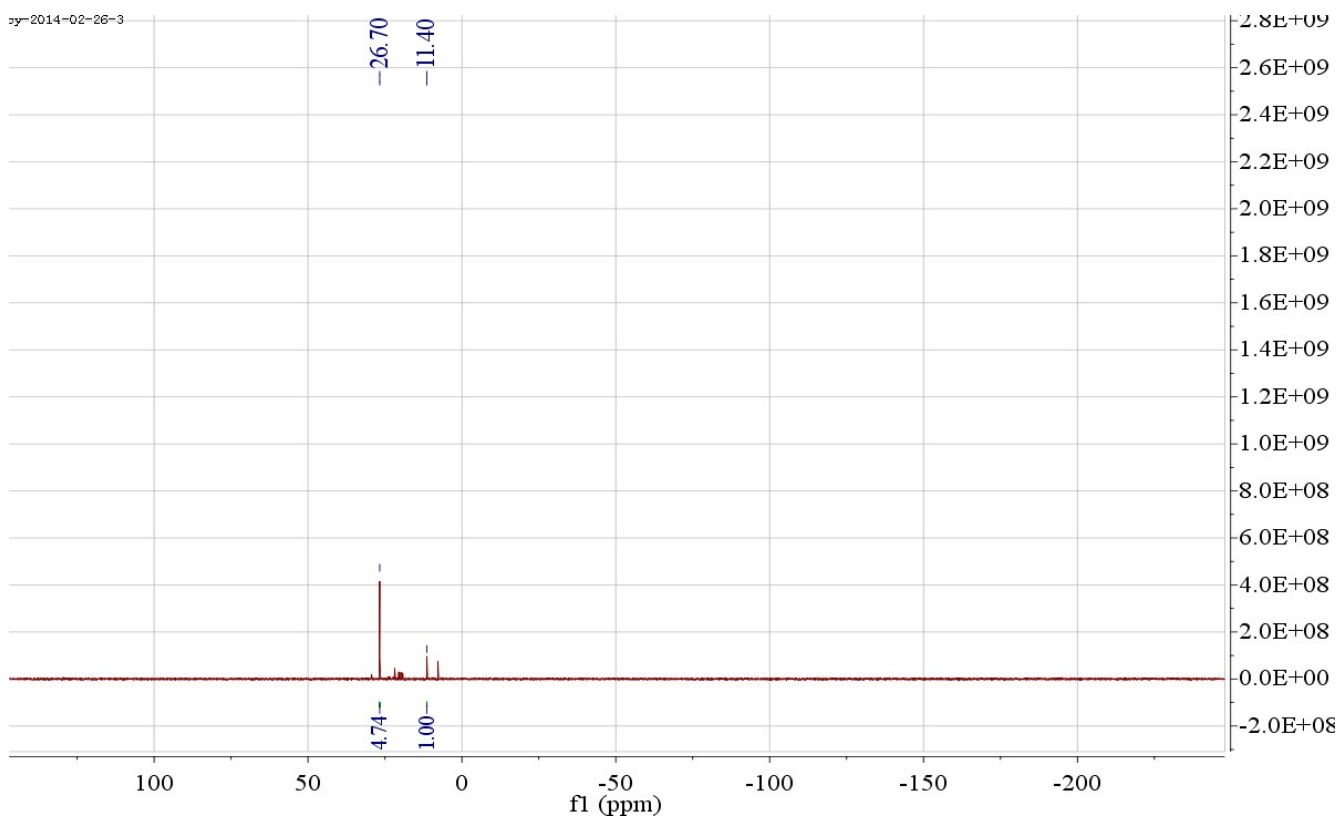

The mole ratio of **3o** and **4o** determined by crude  $^{31}\text{P}$  NMR

### Diethyl (2-(1,3-dioxisoindolin-2-yl)-2-(3-methyl-1H-indol-2-yl)propyl)phosphonate (3p):

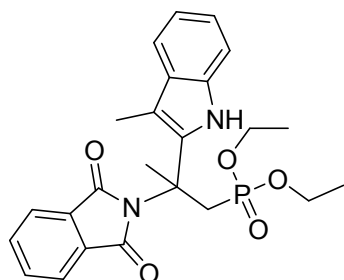

Yellow solid; mp: 182-183 °C;  $^1\text{H}$  NMR (400 MHz,  $\text{CDCl}_3$ ):  $\delta$  9.18 (s, 1H, N-H), 7.68-7.75 (m, 2H, Ph), 7.59-7.65 (m, 2H, Ph), 7.37 (d,  $J = 7.9$  Hz, 1H, Ph), 7.25 (d,  $J = 7.9$  Hz, 1H, Ph), 7.05 (t,  $J = 7.5$  Hz, 1H, Ph), 6.97 (t,  $J = 7.5$  Hz, 1H, Ph), 3.82-4.05 (m, 4H,  $2\text{OCH}_2$ ), 3.39 (dd,  $J = 19.9, 15.2$  Hz, 1H,  $\text{CH}_2\text{P}$ ), 2.98 (dd,  $J = 19.9, 15.2$  Hz, 1H,  $\text{CH}_2\text{P}$ ), 2.30 (s, 3H,  $\text{CH}_3$ ), 2.09 (s, 3H,  $\text{CH}_3$ ), 1.15 (t,  $J = 7.1$  Hz, 3H,  $\text{CH}_3$ ), 1.01 (t,  $J = 7.1$  Hz, 3H,  $\text{CH}_3$ );  $^{13}\text{C}$  NMR (101 MHz,  $\text{CDCl}_3$ ):  $\delta$  168.52 (s, C=O), 134.56, 134.07, 131.66, 129.62 (s, Ph), 123.72 (s, =C-N), 123.11, 121.72, 119.14, 118.15, 111.10 (s, Ph), 106.12 (s, =CH), 62.14 (d,  $J = 6.8$  Hz,  $\text{OCH}_2$ ), 61.99 (d,  $J = 6.8$  Hz,  $\text{OCH}_2$ ), 58.51 (s, N-C), 35.23 (d,  $J = 139.9$  Hz,  $\text{CH}_2\text{P}$ ), 26.58 (s,  $\text{CH}_3$ ), 16.25 (d,  $J = 6.4$  Hz,  $\text{CH}_3$ ), 16.10 (d,  $J = 6.4$  Hz,  $\text{CH}_3$ ), 9.36 (s,  $\text{CH}_3$ );  $^{31}\text{P}$  NMR (162 MHz,  $\text{CDCl}_3$ ):  $\delta$  26.03 (s); ESI-HRMS calcd for  $[\text{C}_{24}\text{H}_{27}\text{N}_2\text{O}_5\text{P}, \text{M} + \text{Na}]^+$ : 477.1550, Found: 477.1558.

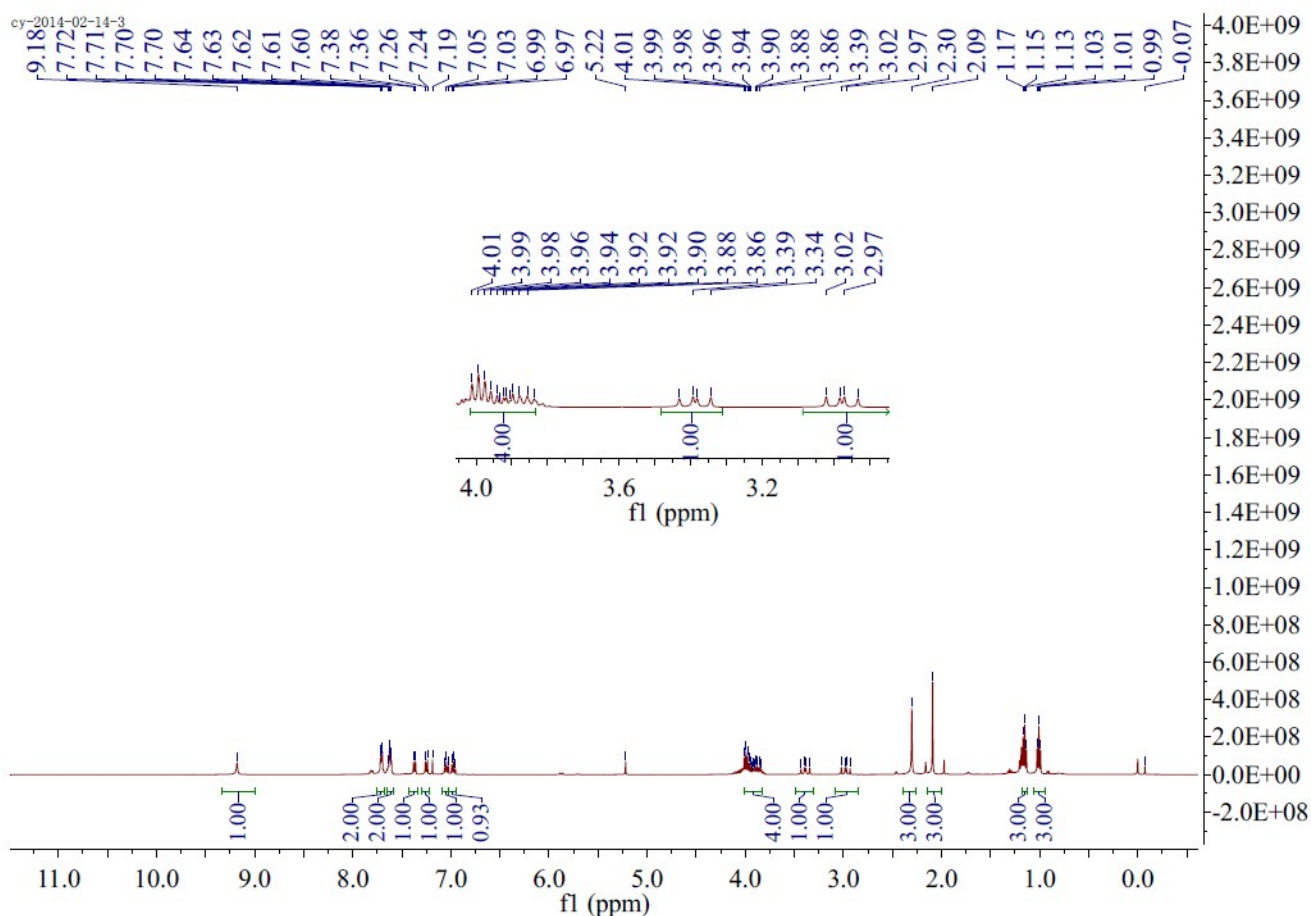

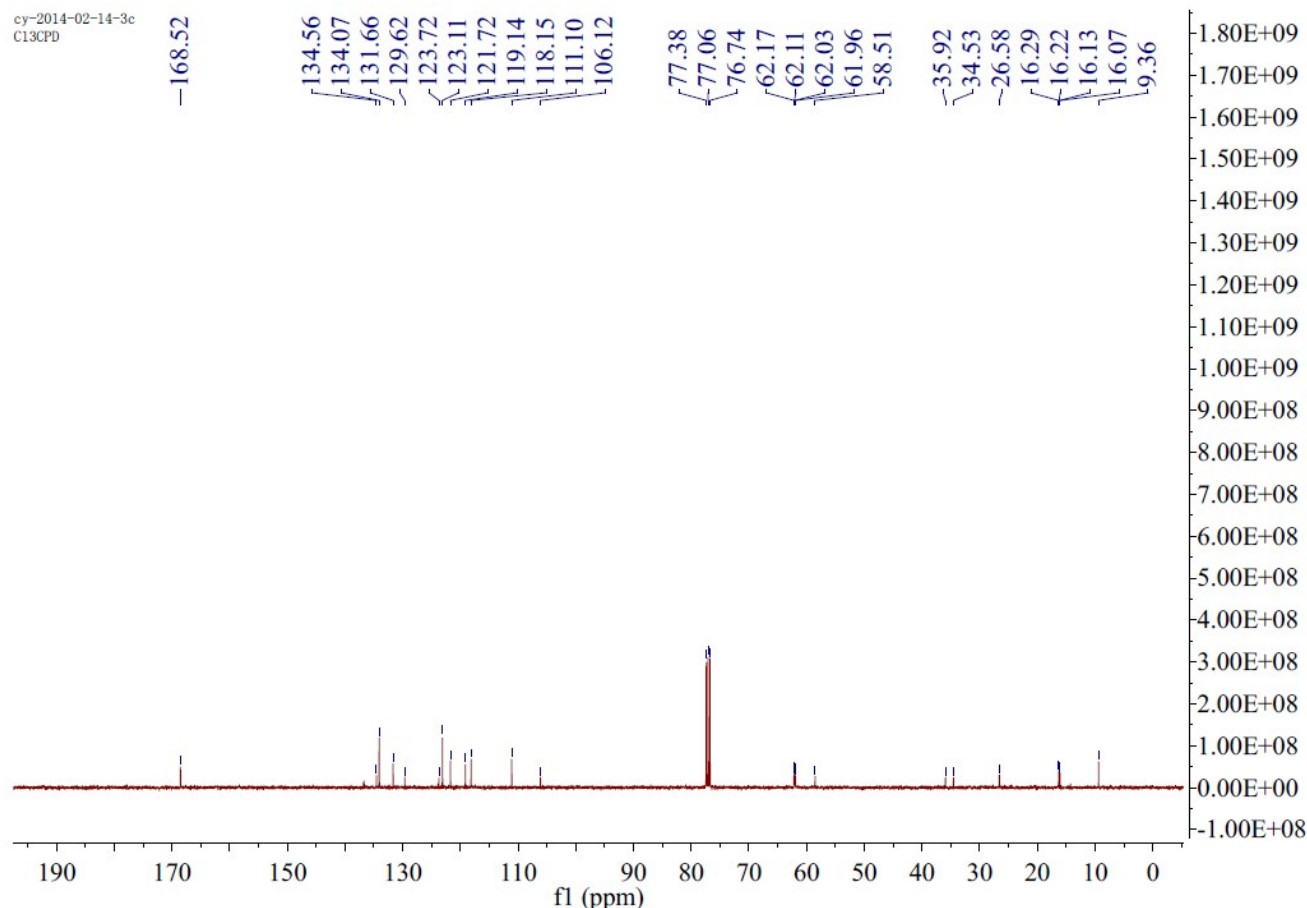

**Diethyl (2-(1,3-dioxoisindolin-2-yl)-2-(3-methyl-1H-indol-1-yl)propyl)phosphonate (3p')**:

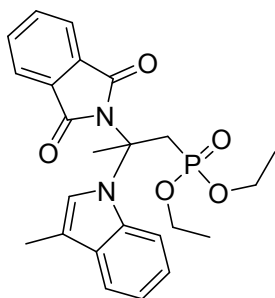

Yellow oil;  $^1\text{H}$  NMR (400 MHz,  $\text{CDCl}_3$ ):  $\delta$  7.71-7.80 (m, 2H, Ph), 7.63-7.69 (m, 2H, Ph), 7.52 (d,  $J = 8.2$  Hz, 1H, Ph), 7.20-7.27 (m, 2H, Ph, =CH), 6.98-7.10 (m, 2H, Ph), 3.76-4.03 (m, 5H,  $2\text{OCH}_2$ ,  $\text{CH}_2\text{P}$ ), 3.08 (dd,  $J = 21.3, 14.9$  Hz, 1H,  $\text{CH}_2\text{P}$ ), 2.59 (s, 3H,  $\text{CH}_3$ ), 2.33 (s, 3H,  $\text{CH}_3$ ), 1.16 (t,  $J = 7.1$  Hz, 3H,  $\text{CH}_3$ ), 1.03 (t,  $J = 7.1$  Hz, 3H,  $\text{CH}_3$ );  $^{13}\text{C}$  NMR (101 MHz,  $\text{CDCl}_3$ ):  $\delta$  168.06 (s, C=O),

134.22, 131.36, 128.66, 123.56, 123.36 (s, Ph), 122.80 (s, =C), 121.87, 119.57, 119.21, 110.95 (s, Ph), 110.39 (s, =CH), 73.21 (s, N-C), 62.10 (d,  $J = 6.7$  Hz,  $\text{OCH}_2$ ), 61.94 (d,  $J = 6.7$  Hz,  $\text{OCH}_2$ ), 35.73 (d,  $J = 143.5$  Hz,  $\text{CH}_2\text{P}$ ), 26.51 (s,  $\text{CH}_3$ ), 16.15 (d,  $J = 6.5$  Hz,  $\text{CH}_3$ ), 16.01 (d,  $J = 6.5$  Hz,  $\text{CH}_3$ ), 9.71 (s,  $\text{CH}_3$ );  $^{31}\text{P}$  NMR (162 MHz,  $\text{CDCl}_3$ ):  $\delta$  23.38 (s); ESI-HRMS calcd for  $[\text{C}_{24}\text{H}_{27}\text{N}_2\text{O}_5\text{P}, \text{M} + \text{Na}]^+$ : 477.1550, Found: 477.1551.

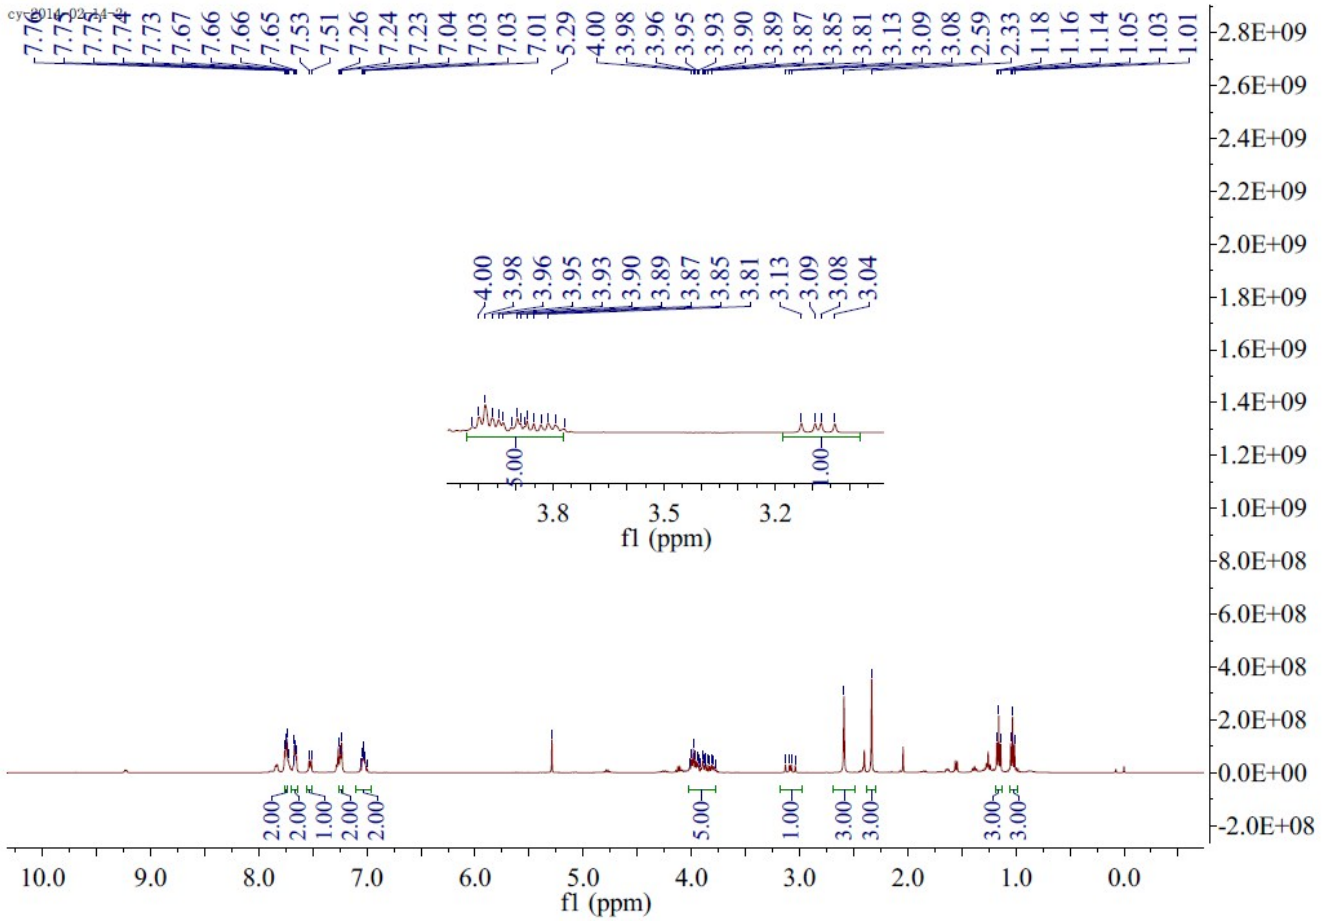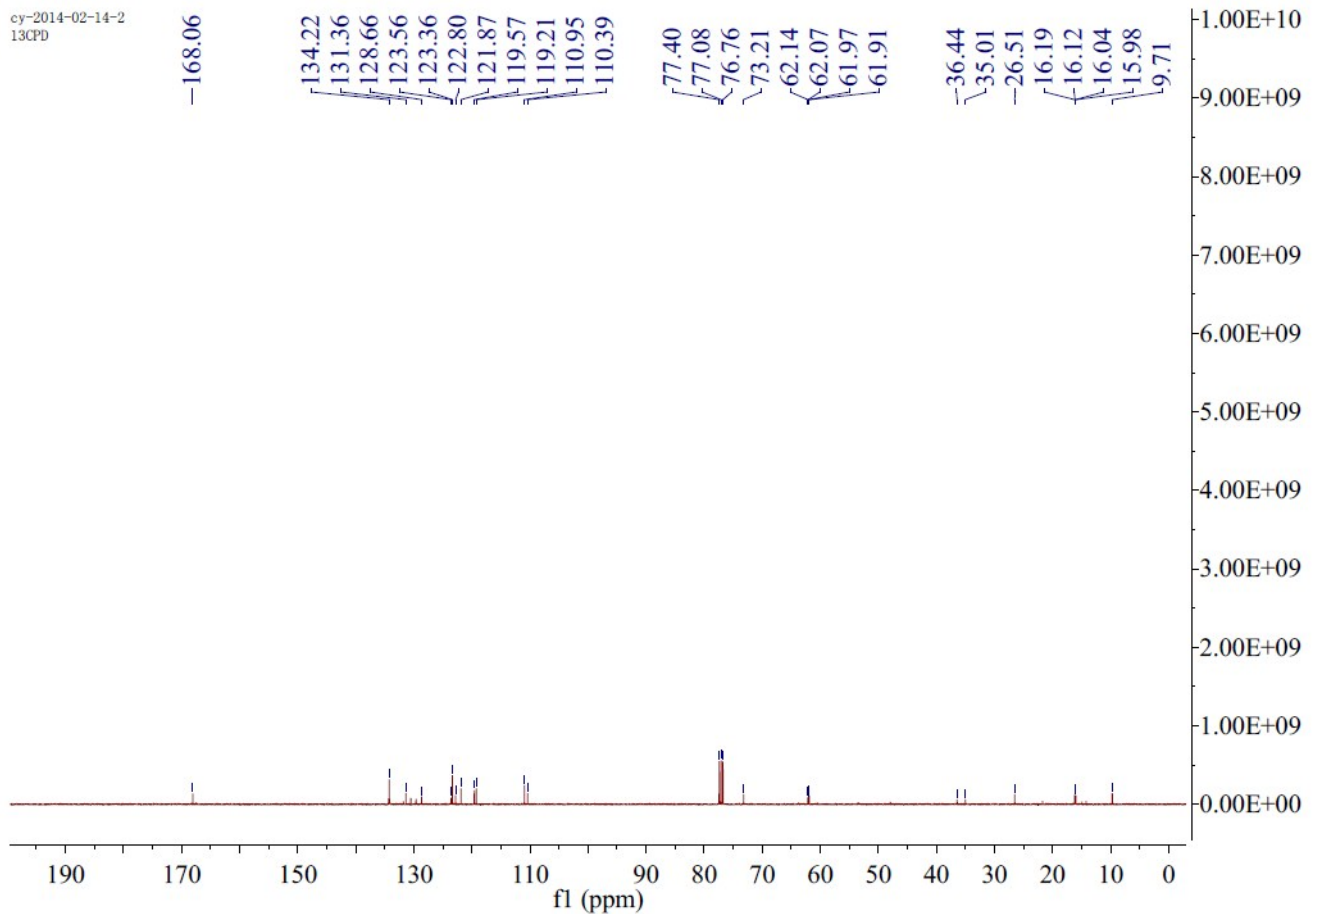

### General procedure for the preparation of 6 and 4:

The 7.2  $\mu\text{L}$   $\text{BF}_3\cdot\text{Et}_2\text{O}$  (0.056 mmol) and 28 mg pyrrole (0.42 mmol) in an oven-dried Schlenk tube was dissolved in 2 mL of freshly distilled  $\text{CH}_2\text{Cl}_2$  under nitrogen. Dialkyl  $\alpha$ -diazophosphonates **1** (0.28 mmol) was diluted with 2 mL of  $\text{CH}_2\text{Cl}_2$  and was drawn into a gastight syringe. It was then added to the reaction mixture dropwise over a period of 1.5h with the help of a syringe pump. After the addition was complete, the reaction mixture was stirred for another 2 hour at 25  $^\circ\text{C}$ . The solvent was then removed under reduced pressure and the crude residue was purified by silica gel chromatography with the eluent [ $\text{CH}_2\text{Cl}_2/\text{EtOAc}$ , 15:1 (v:v)] to give the corresponding products **6** and **4**.

### Diethyl (2-(1,3-dioxoisindolin-2-yl)-2-(1H-pyrrol-2-yl)propyl)phosphonate (6a):

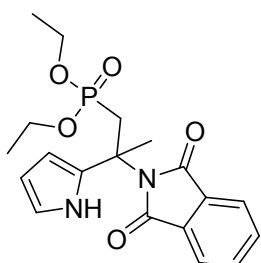

White solid; mp: 111-112  $^\circ\text{C}$ ;  $^1\text{H}$  NMR (400 MHz,  $\text{CDCl}_3$ ):  $\delta$  10.02 (s, 1H, N-H), 7.74-7.87 (m, 2H, Ph), 7.64-7.72 (m, 2H, Ph), 6.80 (s, 1H, =CH), 6.20 (s, 1H, =CH), 6.11-6.19 (m, 1H, =CH), 3.92-4.11 (m, 4H, 2OCH<sub>2</sub>), 3.21-3.44 (m, 1H, CH<sub>2</sub>P), 2.91 (dd,  $J$  = 19.9, 15.6 Hz, 1H, CH<sub>2</sub>P), 2.33 (s, 3H, CH<sub>3</sub>), 1.21 (t,  $J$  = 7.1 Hz, 3H, CH<sub>3</sub>), 1.12 (t,  $J$  = 7.1 Hz, 3H, CH<sub>3</sub>);  $^{13}\text{C}$  NMR (101 MHz,  $\text{CDCl}_3$ ):  $\delta$  169.25 (s, C=O), 134.40 (d,  $J$  = 11.4 Hz, =C), 133.92, 131.92, 122.92 (s, Ph), 118.24, 107.45, 105.92 (s, =CH), 61.90 (d,  $J$  = 2.9 Hz, OCH<sub>2</sub>), 61.84 (d,  $J$  = 2.9 Hz, OCH<sub>2</sub>), 56.95 (d,  $J$  = 4.6 Hz, N-C), 36.21 (d,  $J$  = 137.8 Hz, CH<sub>2</sub>P), 26.90 (d,  $J$  = 7.8 Hz, CH<sub>3</sub>), 16.23 (d,  $J$  = 6.3 Hz, CH<sub>3</sub>), 16.09 (d,  $J$  = 6.3 Hz, CH<sub>3</sub>);  $^{31}\text{P}$  NMR (162 MHz,  $\text{CDCl}_3$ ):  $\delta$  26.74 (s); ESI-HRMS calcd for [ $\text{C}_{19}\text{H}_{23}\text{N}_2\text{O}_5\text{P}$ , M + Na] $^+$ : 413.1237, Found : 413.1229.

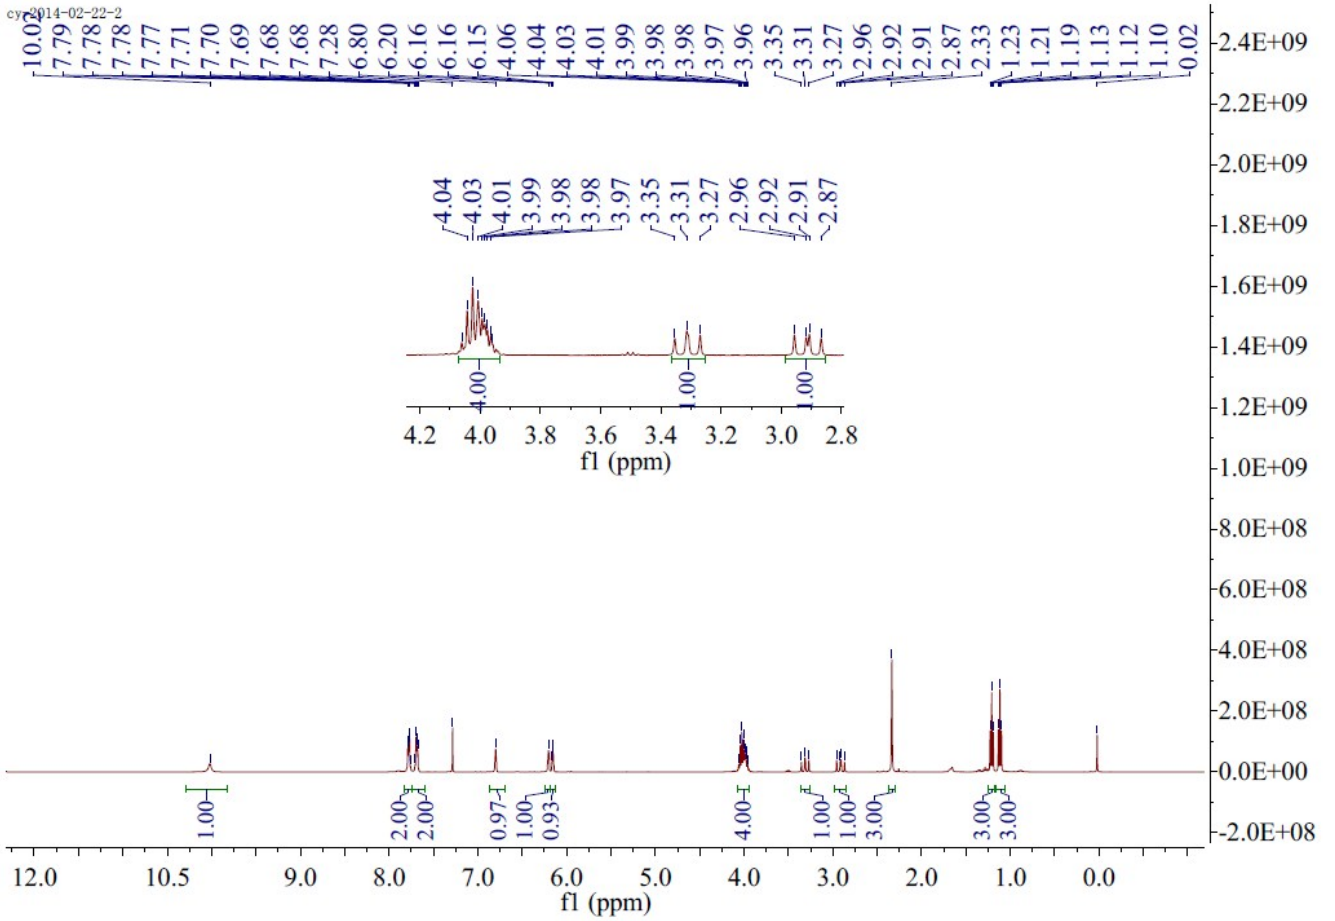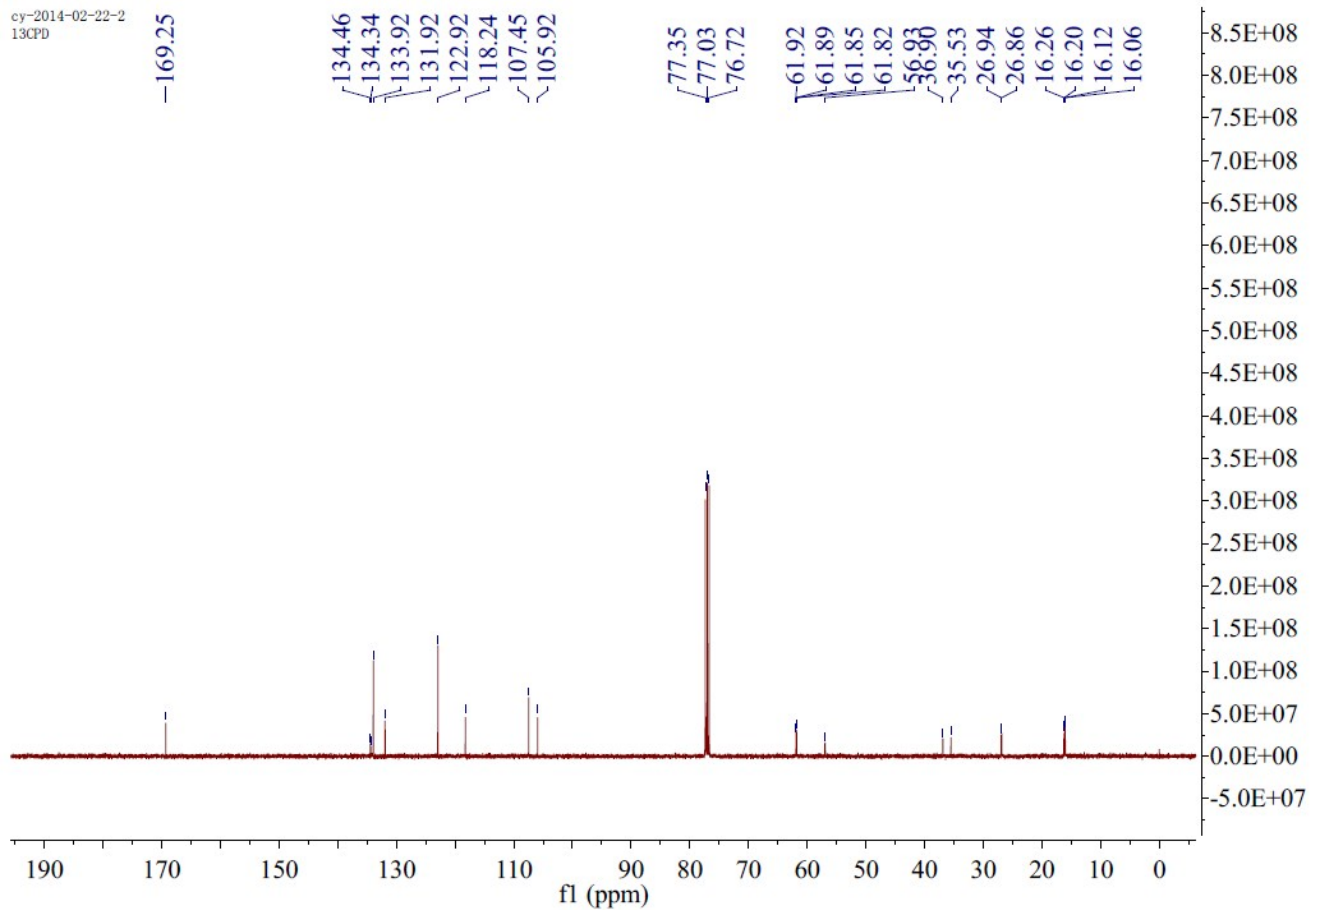

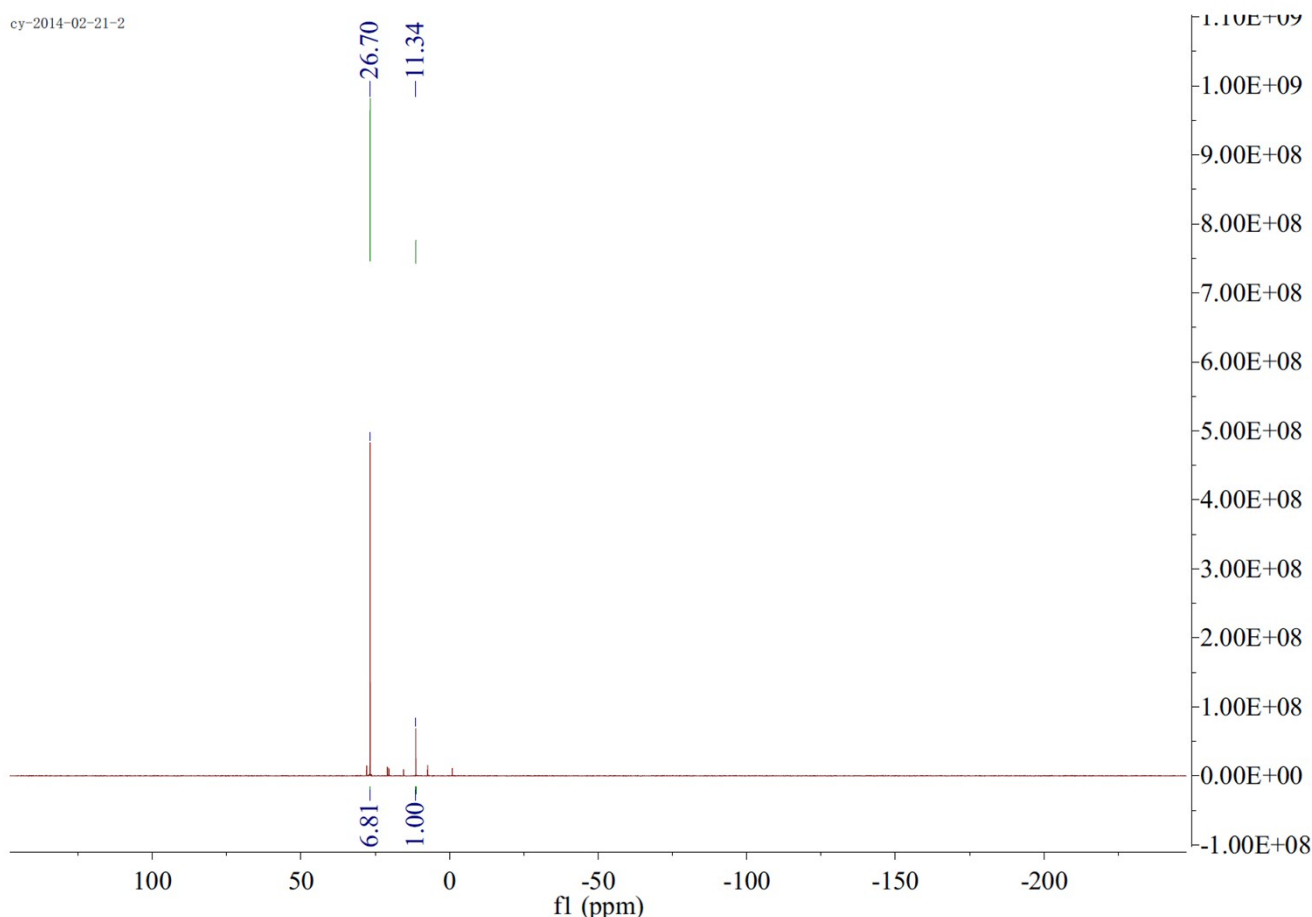

The mole ratio of **6a** and **4a** determined by crude  $^{31}\text{P}$  NMR

**Diethyl (2-(1,3-dioxoisindolin-2-yl)-4-methyl-2-(1H-pyrrol-2-yl)pentyl)phosphonate (**6b**):**

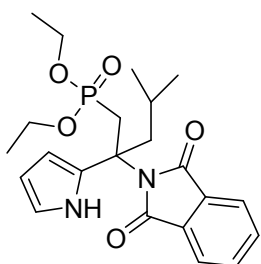

White solid; mp: 119-120 °C;  $^1\text{H}$  NMR (400 MHz,  $\text{CDCl}_3$ ):  $\delta$  9.70 (s, 1H, N-H), 7.73-7.83 (m, 2H, Ph), 7.63-7.69 (m, 2H, Ph), 6.72 (s, 1H, =CH), 6.15 (s, 1H, =CH), 6.12 (s, 1H, =CH), 3.99-4.10 (m, 2H,  $\text{OCH}_2$ ), 3.83-3.95 (m, 2H,  $\text{OCH}_2$ ), 3.58 (dd,  $J = 18.8, 15.7$  Hz, 1H,  $\text{CH}_2\text{P}$ ), 2.61-2.78 (m, 2H,  $\text{CH}_2, \text{CH}_2\text{P}$ ), 2.40 (dd,  $J = 13.5, 4.3$  Hz, 1H,  $\text{CH}_2$ ), 1.78-1.93 (m, 1H, CH), 1.17 (dd,  $J = 15.1, 7.3$  Hz, 6H,  $2\text{CH}_3$ ), 0.87 (d,  $J = 6.6$  Hz, 3H,  $\text{CH}_3$ ), 0.83 (d,  $J = 6.6$  Hz, 3H,  $\text{CH}_3$ );  $^{13}\text{C}$  NMR (101 MHz,  $\text{CDCl}_3$ ):  $\delta$  169.06 (s, C=O), 133.85 (s, Ph), 133.14 (s, =C), 131.85, 122.98 (s, Ph), 117.45, 107.71, 105.83 (s, =CH), 62.16 (d,  $J = 6.7$  Hz,  $\text{OCH}_2$ ), 61.54 (d,  $J = 6.7$  Hz,  $\text{OCH}_2$ ), 60.77 (d,  $J = 4.9$  Hz, N-C), 46.59 (d,  $J = 11.3$  Hz,  $\text{CH}_2$ ), 34.62 (d,  $J = 141.1$  Hz,  $\text{CH}_2\text{P}$ ), 24.57 (s, CH), 24.45 (s,  $\text{CH}_3$ ), 24.38 (s,  $\text{CH}_3$ ), 16.21 (d,  $J = 6.1$  Hz,  $\text{CH}_3$ );  $^{31}\text{P}$  NMR (162 MHz,  $\text{CDCl}_3$ ):  $\delta$  28.16 (s); ESI-HRMS calcd for  $[\text{C}_{22}\text{H}_{29}\text{N}_2\text{O}_5\text{P}, \text{M} + \text{Na}]^+$ : 455.1706, Found : 455.1714.



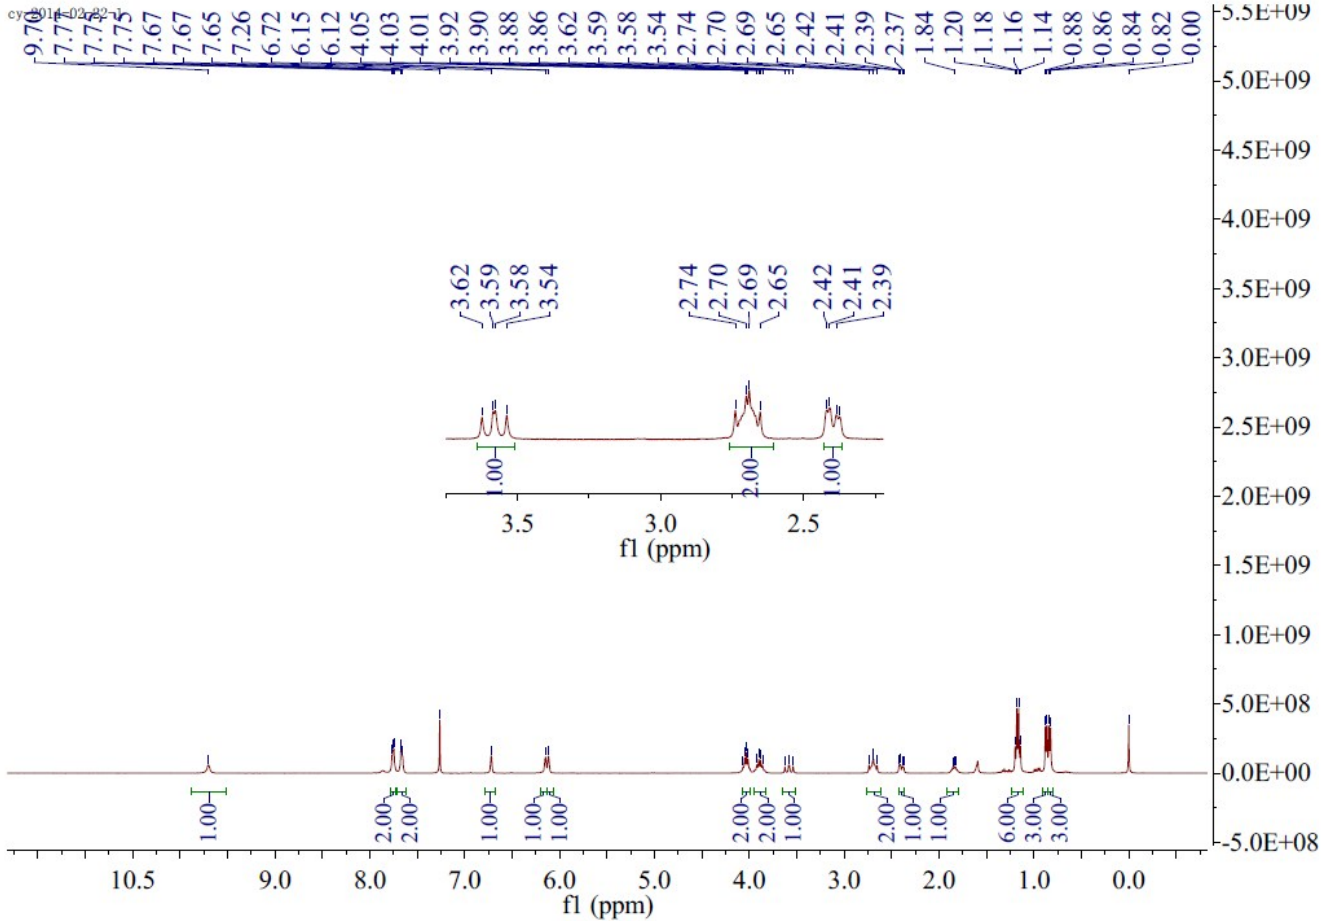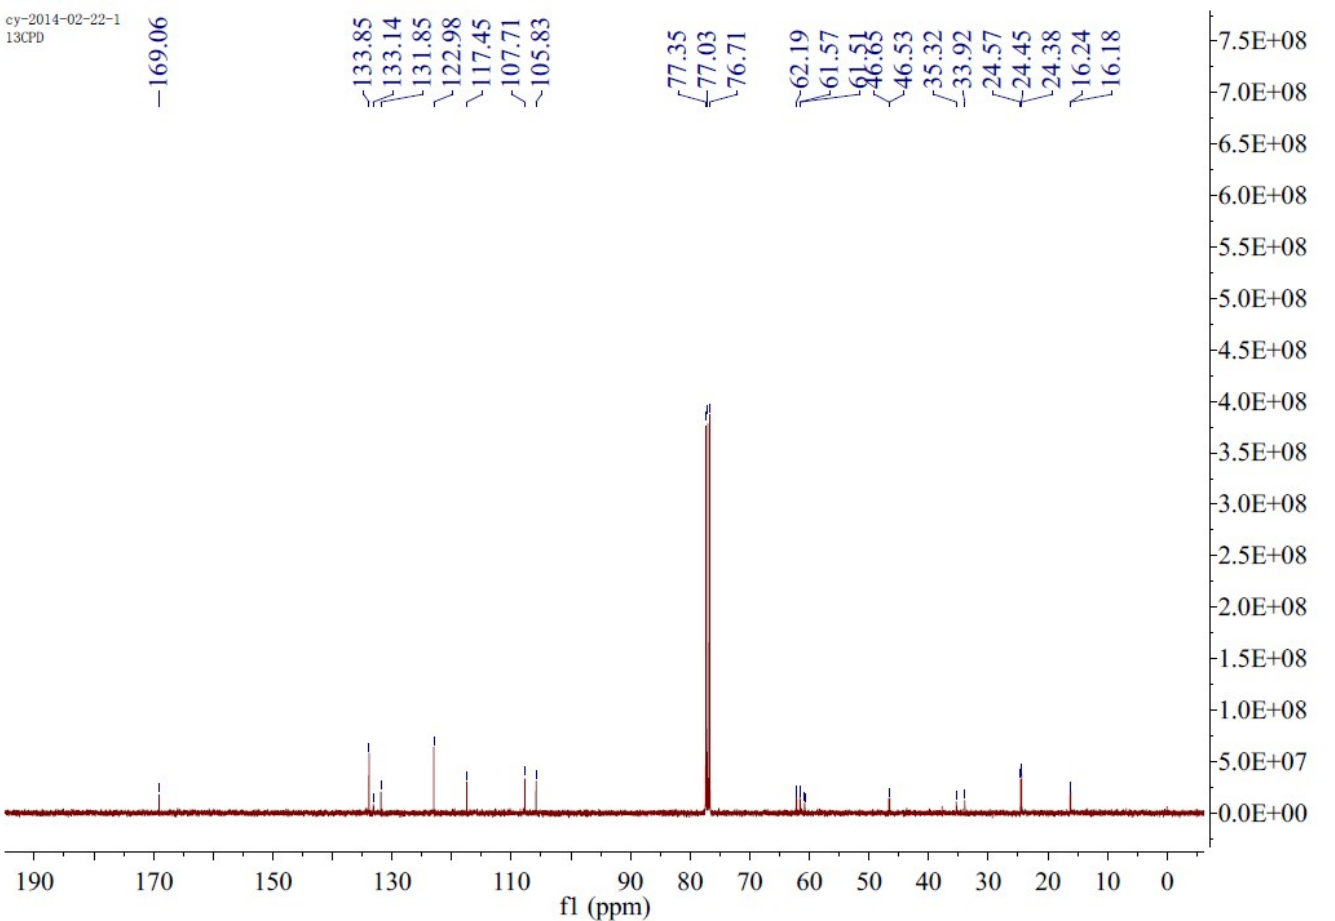

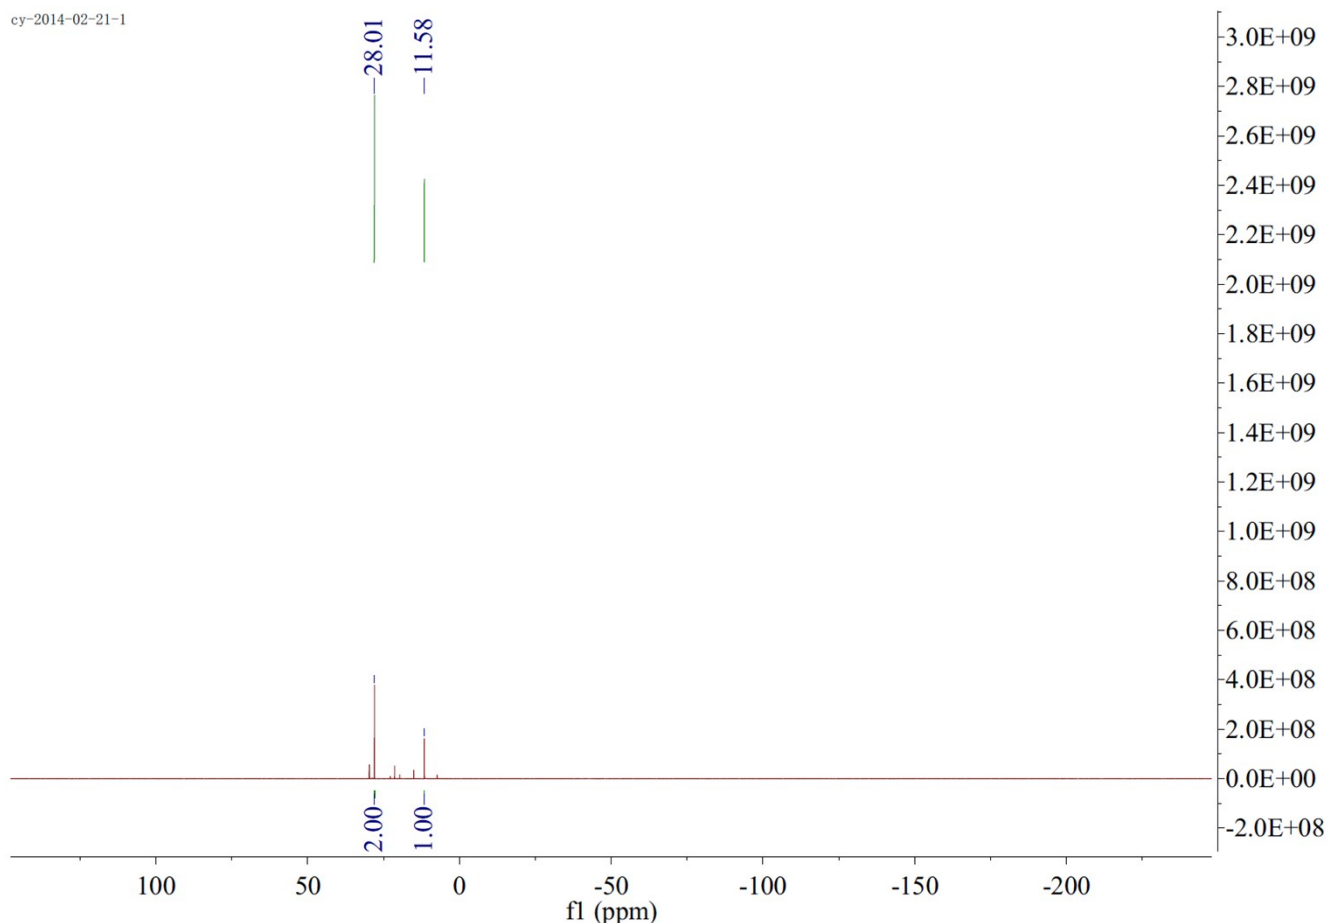

The mole ratio of **6b** and **4b** determined by crude  $^{31}\text{P}$  NMR

**Diethyl (2-(1,3-dioxoisindolin-2-yl)-3-phenyl-2-(1H-pyrrol-2-yl)propyl)phosphonate (6c):**

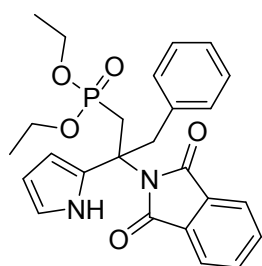

White solid; mp: 152-154 °C;  $^1\text{H}$  NMR (400 MHz,  $\text{CDCl}_3$ ):  $\delta$  9.33 (s, 1H, N-H), 7.70-7.77 (m, 2H, Ph), 7.64-7.70 (m, 2H, Ph), 7.11-7.23 (m, 3H, Ph), 6.96 (d,  $J = 6.9$  Hz, 2H, Ph), 6.71 (s, 1H, =CH), 6.17 (d,  $J = 2.7$  Hz, 1H, =CH), 6.13 (s, 1H, =CH), 4.22 (dd,  $J = 13.4, 4.0$  Hz, 1H,  $\text{CH}_2$ ), 3.95-4.09 (m, 2H,  $\text{OCH}_2$ ), 3.76-3.91 (m, 2H,  $\text{OCH}_2$ ), 3.63 (d,  $J = 13.4$  Hz, 1H,  $\text{CH}_2$ ), 3.35 (dd,  $J = 19.4, 15.4$  Hz, 1H,  $\text{CH}_2\text{P}$ ), 2.61 (dd,  $J = 19.4, 15.4$  Hz, 1H,  $\text{CH}_2\text{P}$ ), 1.20 (t,  $J = 7.1$  Hz, 3H,  $\text{CH}_3$ ), 1.10 (t,  $J = 7.1$  Hz, 3H,  $\text{CH}_3$ );  $^{13}\text{C}$  NMR (101 MHz,  $\text{CDCl}_3$ ):  $\delta$  168.86 (s, C=O), 135.73 (s, Ph), 133.88 (s, Ph), 133.29 (d,  $J = 9.0$  Hz, =C), 131.76, 130.78, 128.13, 127.09, 123.04 (s, Ph), 117.35, 108.00, 105.85 (s, =CH), 62.36 (d,  $J = 6.4$  Hz,  $\text{OCH}_2$ ), 61.23 (d,  $J = 6.4$  Hz,  $\text{OCH}_2$ ), 61.13 (d,  $J = 4.2$  Hz, N-C), 43.52 (d,  $J = 10.8$  Hz,  $\text{CH}_2$ ), 33.72 (d,  $J = 142.6$  Hz,  $\text{CH}_2\text{P}$ ), 16.32 (d,  $J = 6.1$  Hz,  $\text{CH}_3$ ), 16.12 (d,  $J = 6.1$  Hz,  $\text{CH}_3$ );  $^{31}\text{P}$  NMR (162 MHz,  $\text{CDCl}_3$ ):  $\delta$  27.81 (s); ESI-HRMS calcd for  $[\text{C}_{25}\text{H}_{27}\text{N}_2\text{O}_5\text{P}, \text{M} + \text{Na}]^+$ : 489.1550, Found : 489.1546.

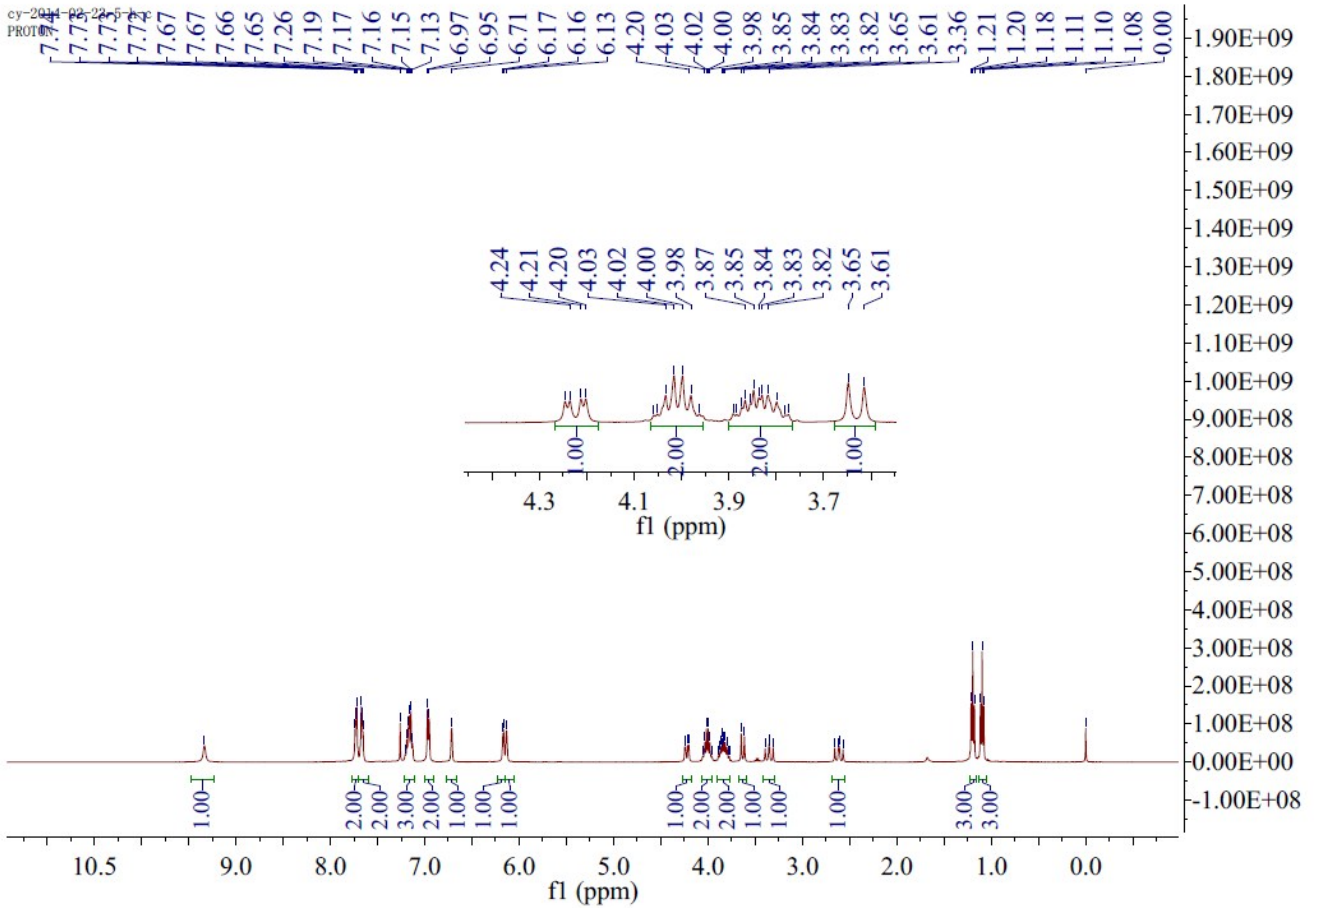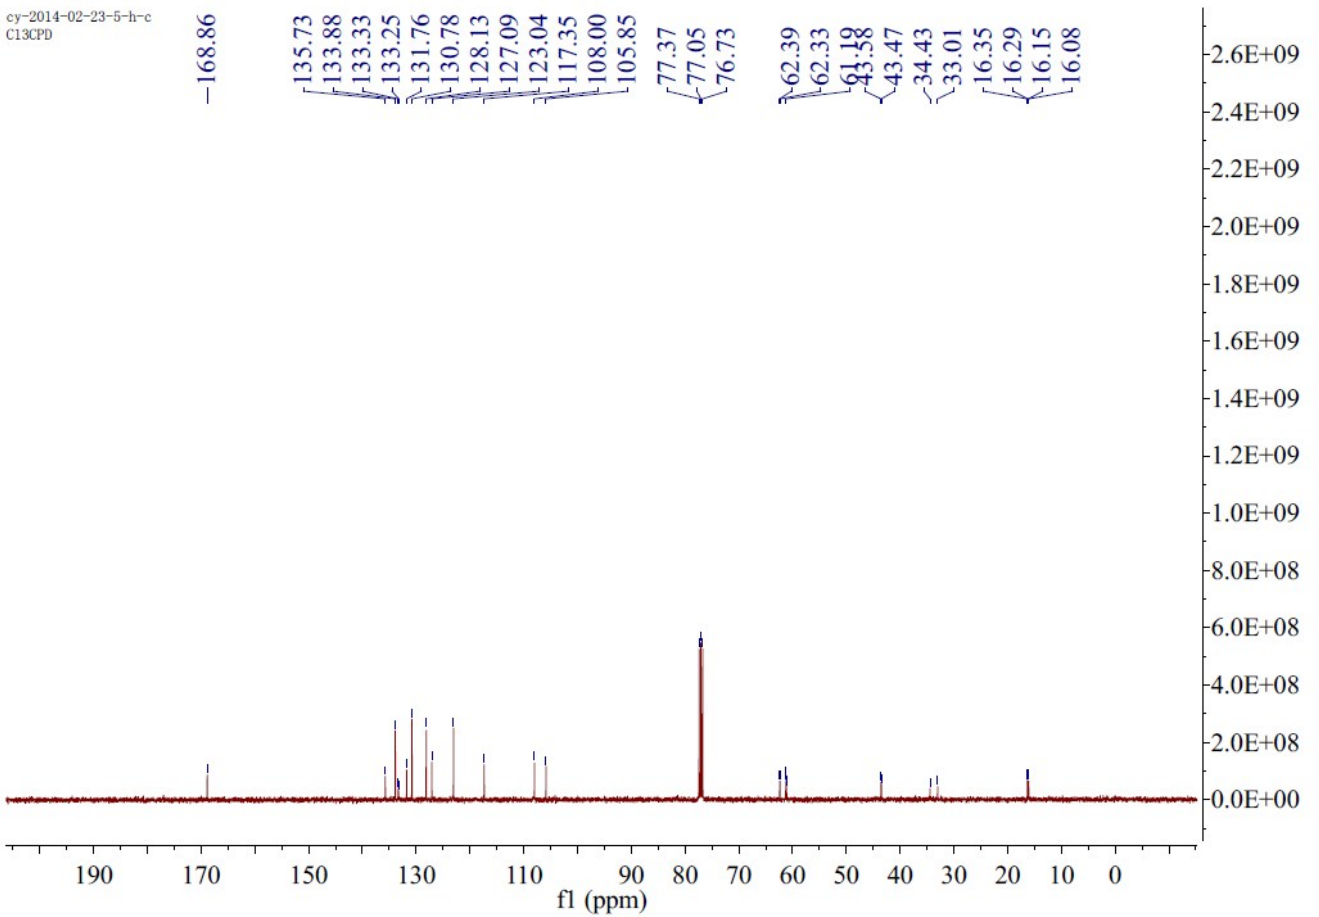

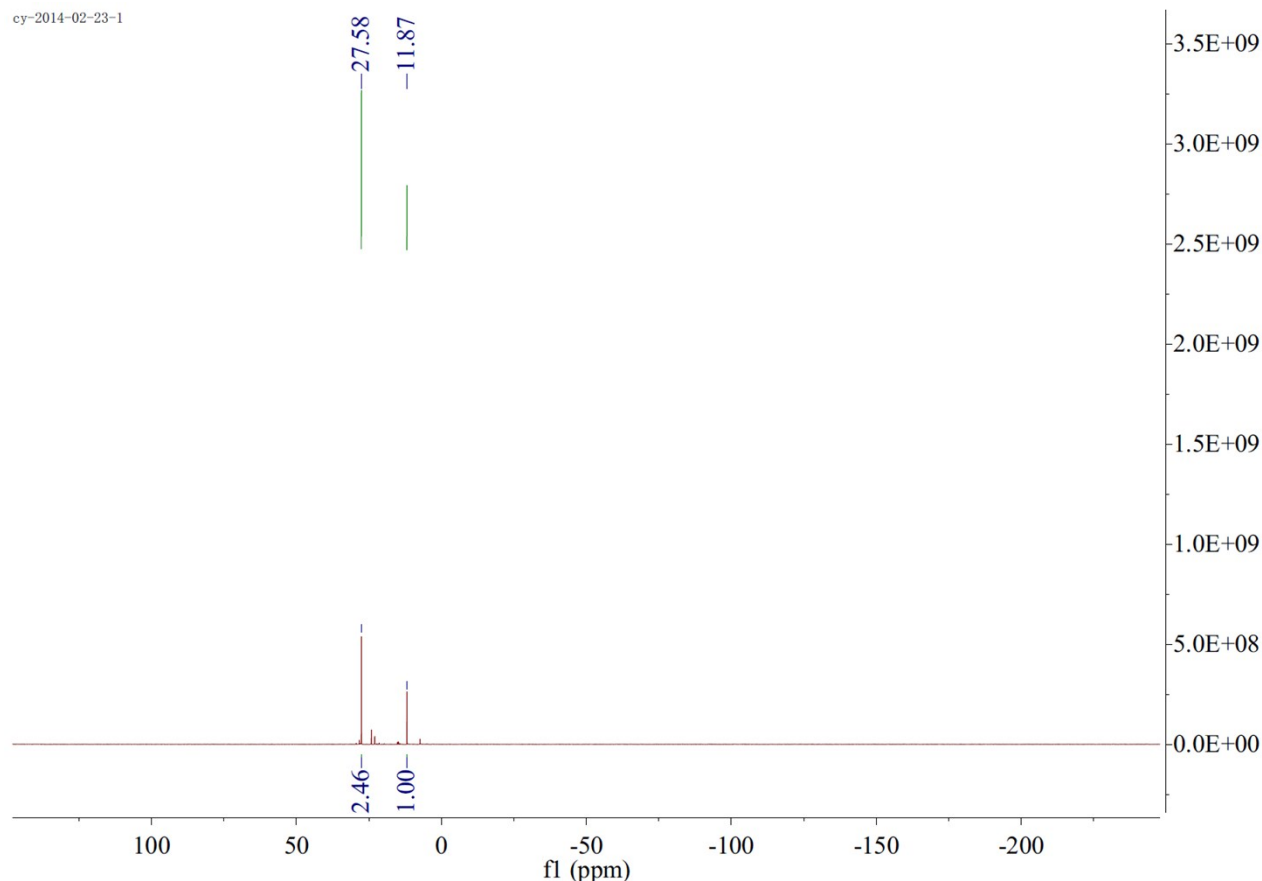

The mole ratio of **6c** and **4c** determined by crude  $^{31}\text{P}$  NMR

**4-(3-(diethoxyphosphoryl)-2-(1,3-dioxoisindolin-2-yl)-2-(1H-pyrrol-2-yl)propyl)phenyl acetate**

**(6d):**

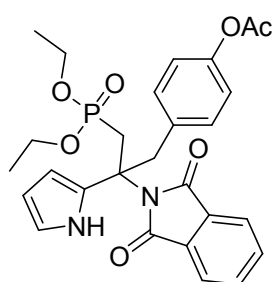

White solid; mp: 153-154 °C;  $^1\text{H}$  NMR (400 MHz,  $\text{CDCl}_3$ ):  $\delta$  9.17 (s, 1H, N-H), 7.72-7.80 (m, 2H, Ph), 7.63-7.70 (m, 2H, Ph), 6.83-6.99 (m, 4H, Ph), 6.71 (s, 1H, =CH), 6.15 (s, 1H, =CH), 6.09 (s, 1H, =CH), 4.30 (d,  $J = 13.5$  Hz, 1H,  $\text{CH}_2$ ), 3.95-4.09 (m, 2H,  $\text{OCH}_2$ ), 3.79-3.93 (m, 2H,  $\text{OCH}_2$ ), 3.68 (d,  $J = 13.5$  Hz,

1H,  $\text{CH}_2$ ), 3.17 (t,  $J = 16.9$  Hz, 1H,  $\text{CH}_2\text{P}$ ), 2.72 (t,  $J = 16.9$  Hz, 1H,  $\text{CH}_2\text{P}$ ), 2.25 (s, 3H,  $\text{CH}_3$ ), 1.19 (t,  $J = 7.1$  Hz, 3H,  $\text{CH}_3$ ), 1.09 (t,  $J = 7.1$  Hz, 3H,  $\text{CH}_3$ );  $^{13}\text{C}$  NMR (101 MHz,  $\text{CDCl}_3$ ):  $\delta$  169.33, 168.83 (s,  $\text{C}=\text{O}$ ), 149.72, 133.93, 133.38, 133.06 (s, Ph), 132.96 (s, =C), 131.79, 123.07, 121.07 (s, Ph), 117.41, 108.12, 106.34 (s, =CH), 62.32 (d,  $J = 6.6$  Hz,  $\text{OCH}_2$ ), 61.40 (d,  $J = 6.6$  Hz,  $\text{OCH}_2$ ), 61.20 (d,  $J = 4.1$  Hz, N-C), 42.82 (d,  $J = 9.0$  Hz,  $\text{CH}_3$ ), 32.78 (d,  $J = 142.4$  Hz,  $\text{CH}_2\text{P}$ ), 21.16 (s,  $\text{CH}_2$ ), 16.28 (d,  $J = 6.3$  Hz,  $\text{CH}_3$ ), 16.10 (d,  $J = 6.3$  Hz,  $\text{CH}_3$ );  $^{31}\text{P}$  NMR (162 MHz,  $\text{CDCl}_3$ ):  $\delta$  27.34 (s); ESI-HRMS calcd for  $[\text{C}_{27}\text{H}_{29}\text{N}_2\text{O}_7\text{P}, \text{M} + \text{Na}]^+$ : 547.1605, Found : 547.1606.

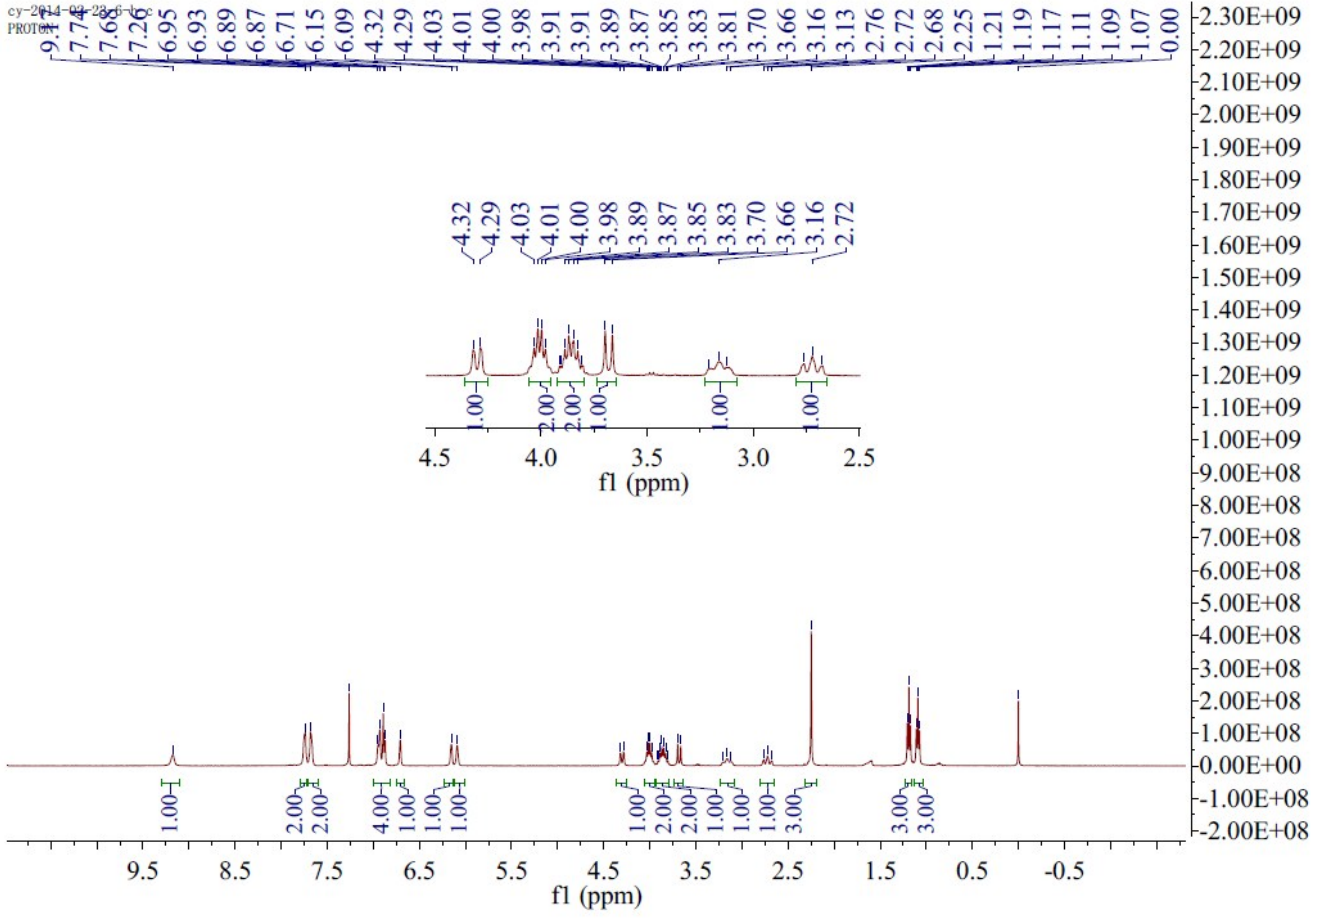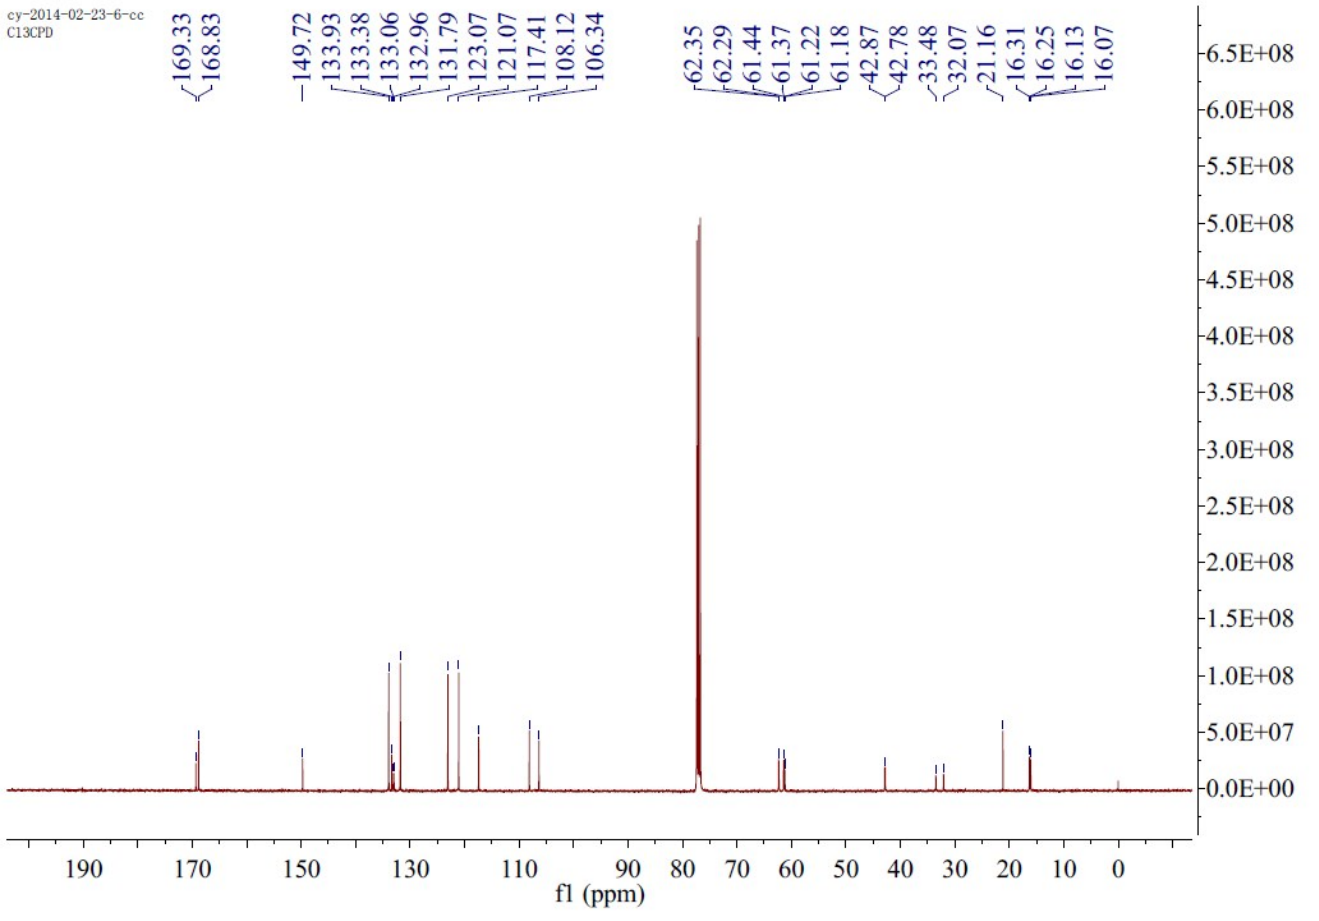

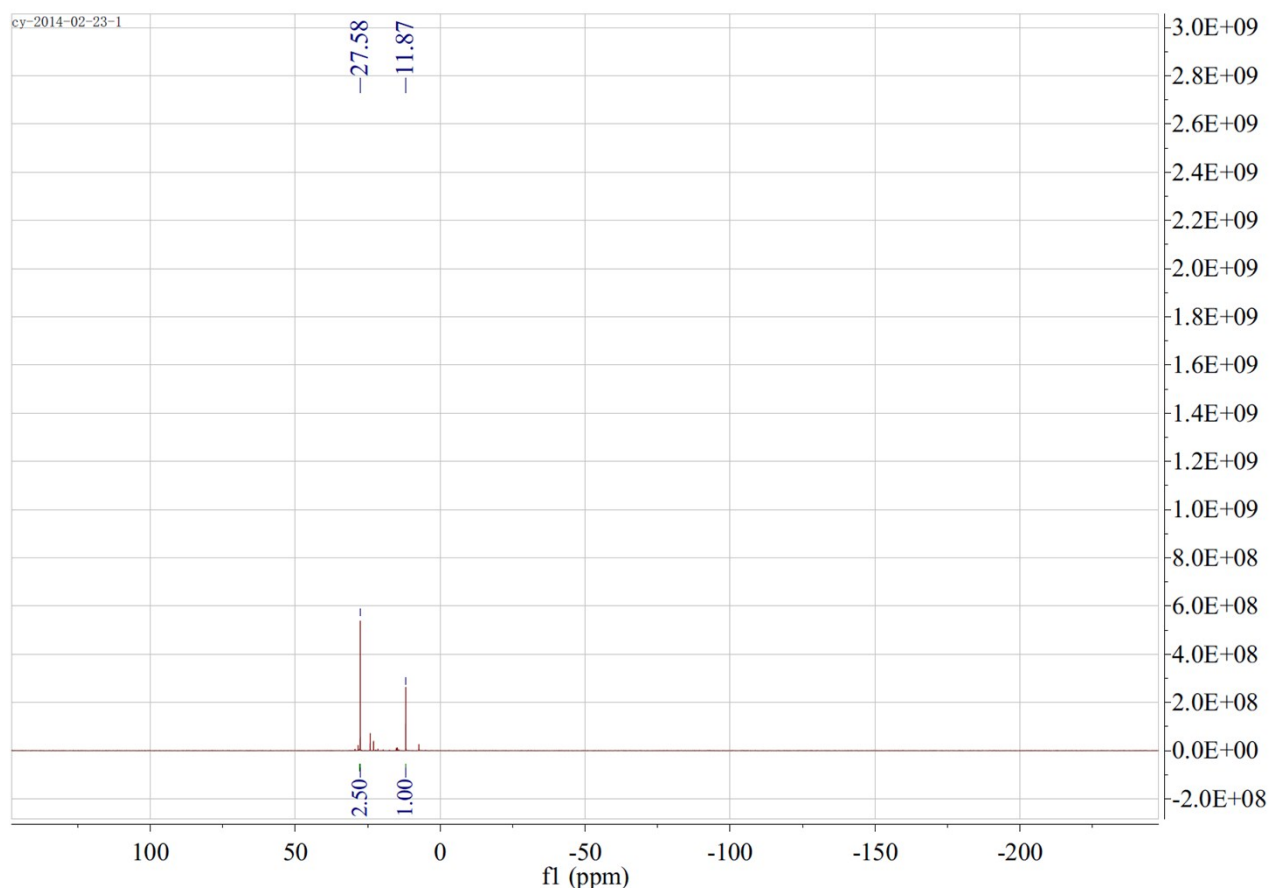

The mole ratio of **6d** and **4d'** determined by crude  $^{31}\text{P}$  NMR

**Diethyl (2,6-bis(1,3-dioxoisindolin-2-yl)-2-(1H-pyrrol-2-yl)hexyl)phosphonate (6e):**

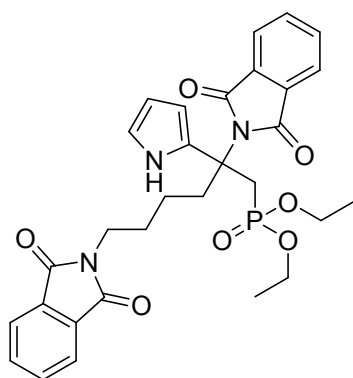

White solid; mp: 101-102 °C;  $^1\text{H}$  NMR (400 MHz,  $\text{CDCl}_3$ ):  $\delta$  9.79 (s, 1H, N-H), 7.78-7.87 (m, 2H, Ph), 7.62-7.77 (m, 6H, Ph), 6.71 (s, 1H, =CH), 6.10 (s, 2H, =CH), 3.84-4.10 (m, 4H, 2OCH<sub>2</sub>), 3.65 (t,  $J = 7.0$  Hz, 2H, CH<sub>2</sub>), 3.35 (dd,  $J = 19.5, 15.7$  Hz, 1H, CH<sub>2</sub>P), 2.75-2.97 (m, 2H, CH<sub>2</sub>, CH<sub>2</sub>P), 2.64 (m, 1H, CH<sub>2</sub>), 1.66-1.80 (m, 2H, CH<sub>2</sub>), 1.33-1.44 (m, 2H, CH<sub>2</sub>), 1.19 (t,  $J = 7.0$ , 3H, CH<sub>3</sub>), 1.12 (t,  $J = 7.0$ , 3H, CH<sub>3</sub>);  $^{13}\text{C}$  NMR

(101 MHz,  $\text{CDCl}_3$ ):  $\delta$  168.97, 168.38 (s, C=O), 133.88 (s, Ph), 132.30 (d,  $J = 9.5$  Hz, =C), 132.13, 131.84, 123.18, 122.98 (s, Ph), 117.75, 107.66, 106.16 (s, =CH), 62.08 (d,  $J = 6.4$  Hz, OCH<sub>2</sub>), 61.82 (d,  $J = 6.4$  Hz, OCH<sub>2</sub>), 60.56 (d,  $J = 3.9$  Hz, N-C), 37.78 (d,  $J = 10.1$  Hz, CH<sub>2</sub>), 37.67 (s, CH<sub>2</sub>), 33.38 (d,  $J = 140.8$  Hz, CH<sub>2</sub>P), 28.53 (s, CH<sub>2</sub>), 21.99 (s, CH<sub>2</sub>), 16.25 (d,  $J = 6.2$  Hz, CH<sub>3</sub>), 16.13 (d,  $J = 6.2$  Hz, CH<sub>3</sub>);  $^{31}\text{P}$  NMR (162 MHz,  $\text{CDCl}_3$ ):  $\delta$  27.77 (s); ESI-HRMS calcd for  $[\text{C}_{30}\text{H}_{32}\text{N}_3\text{O}_7\text{P}, \text{M} + \text{Na}]^+$  : 600.1870, Found: 600.1865.

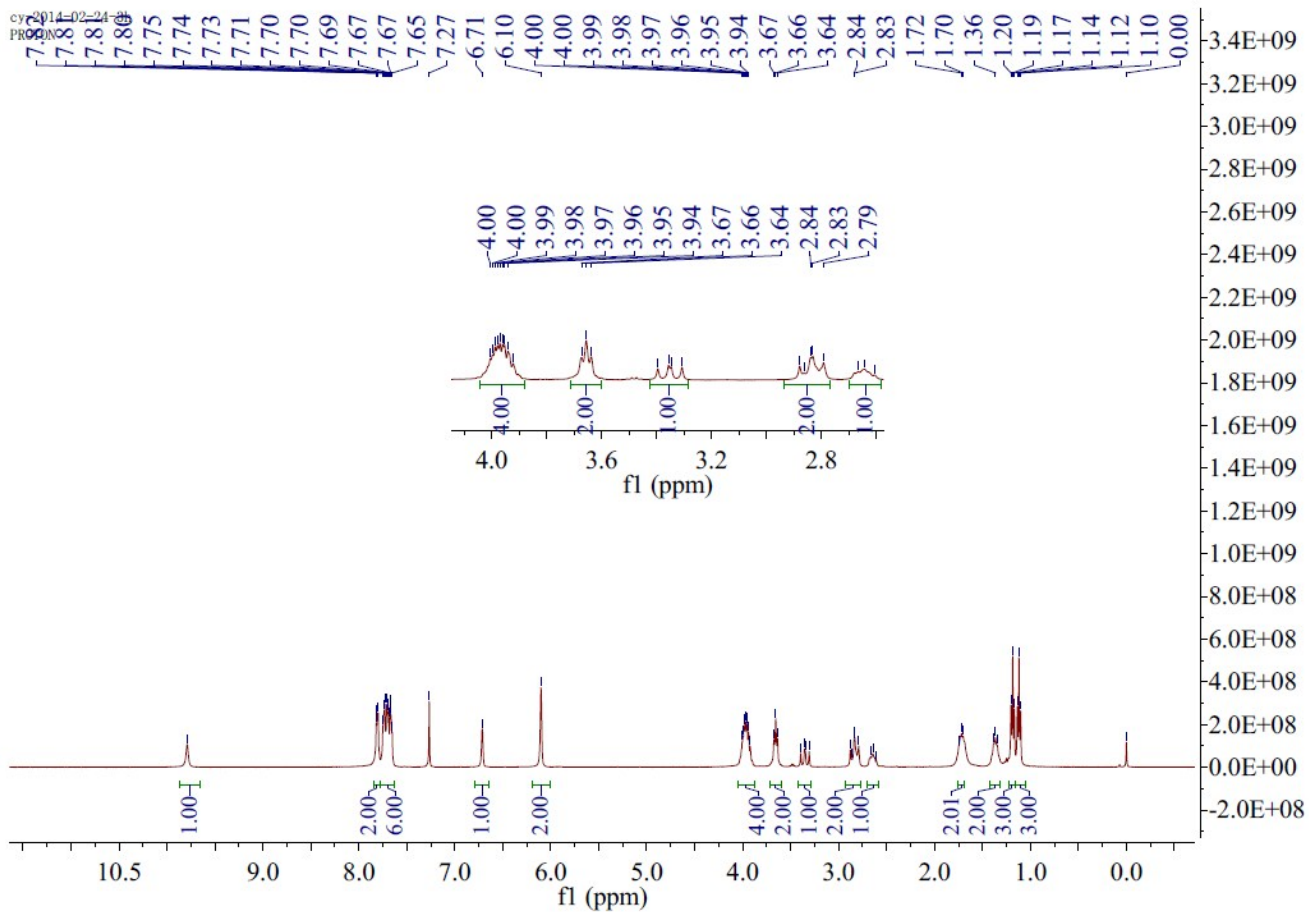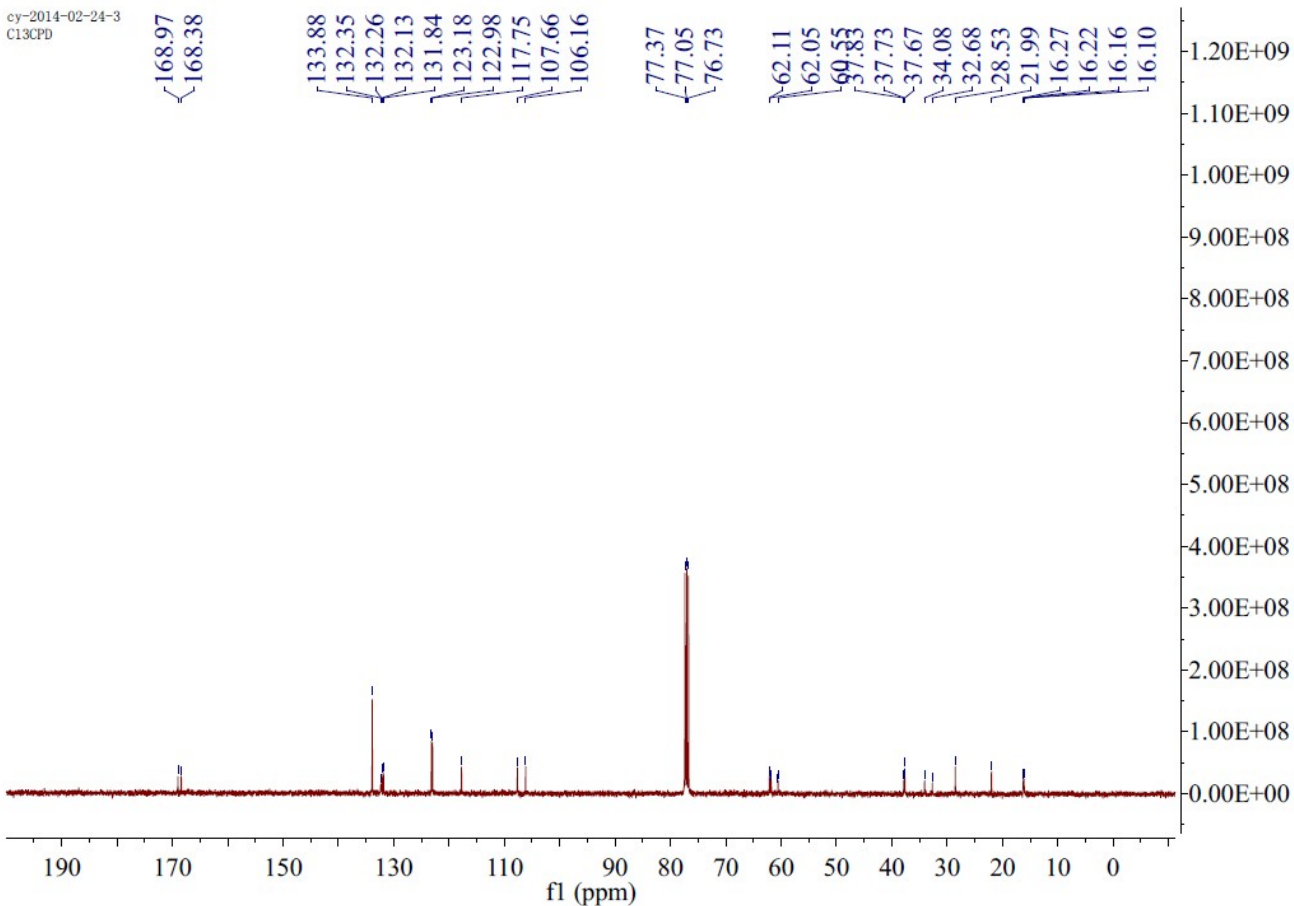

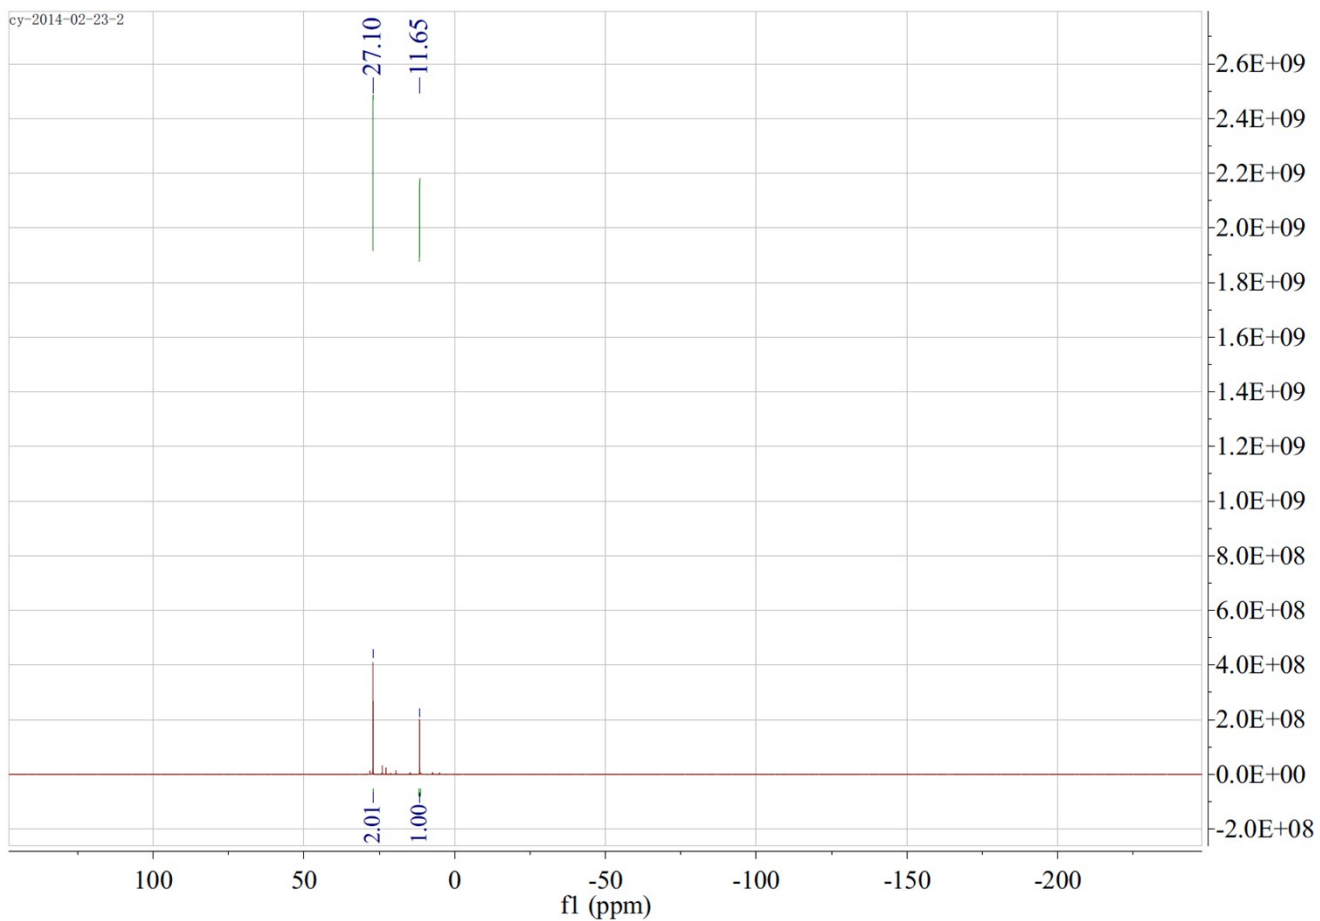

The mole ratio of **6e** and **4e'** determined by crude  $^{31}\text{P}$  NMR



## X-ray crystal structure of 3a and 6a:

Single Crystal X-Ray Analysis **3a** (CCDC 982309) and **6a** (CCDC 992526) contains the supplementary crystallographic data for this paper. These data can be obtained free of charge by contacting The Cambridge Crystallographic Data Centre, 12, Union Road, Cambridge CB2 1EZ, UK; fax: +44 1223 336033; E-mail: [deposit@ccdc.cam.ac.uk](mailto:deposit@ccdc.cam.ac.uk).

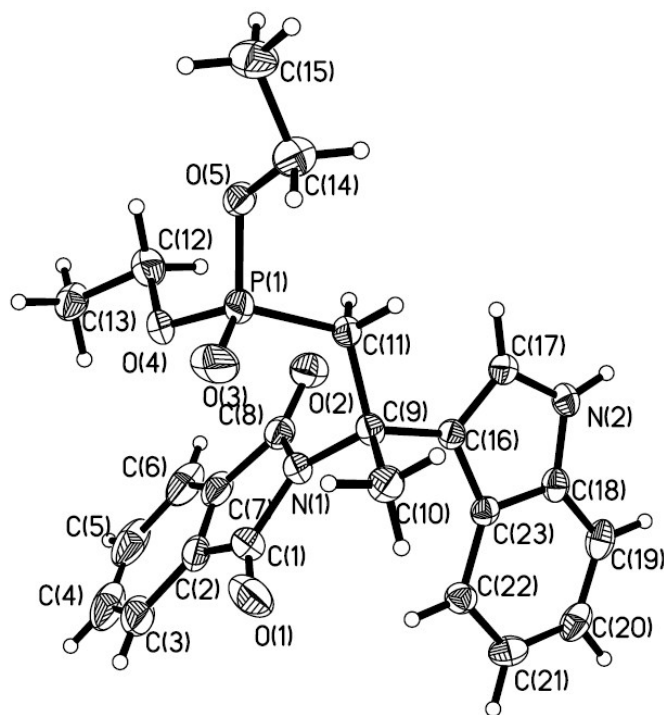

X-ray crystal structure of **3a**

Table 1. Crystal data and structure refinement for R140114A1.

|                             |                                                                 |         |
|-----------------------------|-----------------------------------------------------------------|---------|
| Identification code         | R140114A1                                                       |         |
| Empirical formula           | C <sub>23</sub> H <sub>25</sub> N <sub>2</sub> O <sub>5</sub> P |         |
| Formula weight              | 440.42                                                          |         |
| Temperature                 | 173(2) K                                                        |         |
| Wavelength                  | 0.71073 Å                                                       |         |
| Crystal system, space group | Orthorhombic, Pbc <sub>a</sub>                                  |         |
| Unit cell dimensions        | a = 14.067(3) Å                                                 | α = 90° |
|                             | b = 17.217(3) Å                                                 | β = 90° |

$$c = 18.001(4) \text{ \AA} \quad \gamma = 90^\circ$$

|                                      |                                          |
|--------------------------------------|------------------------------------------|
| Volume                               | 4359.7(15) $\text{\AA}^3$                |
| Z, Calculated density                | 8, 1.342 $\text{Mg/m}^3$                 |
| Absorption coefficient               | 0.164 $\text{mm}^{-1}$                   |
| F(000)                               | 1856                                     |
| Crystal size                         | 0.20 x 0.18 x 0.12 mm                    |
| Theta range for data collection      | 2.19 to 25.02°                           |
| Limiting indices                     | -16 ≤ h ≤ 16, -20 ≤ k ≤ 20, -21 ≤ l ≤ 21 |
| Reflections collected / unique       | 33067/3797 [R(int) = 0.1935]             |
| Completeness to theta = 25.01        | 98.7%                                    |
| Absorption correction                | Semi-empirical from equivalents          |
| Max. and min. transmission           | 0.9806 and 0.9680                        |
| Refinement method                    | Full-matrix least-squares on $F^2$       |
| Data / restraints / parameters       | 3797/103/312                             |
| Goodness-of-fit on $F^2$             | 1.025                                    |
| Final R indices [ $I > 2\sigma(I)$ ] | R1 = 0.0992, wR2 = 0.2308                |
| R indices (all data)                 | R1 = 0.1314, wR2 = 0.2509                |
| Extinction coefficient               | 0.0096(15)                               |
| Largest diff. peak and hole          | 0.301 and -0.416 $\text{e.\AA}^{-3}$     |

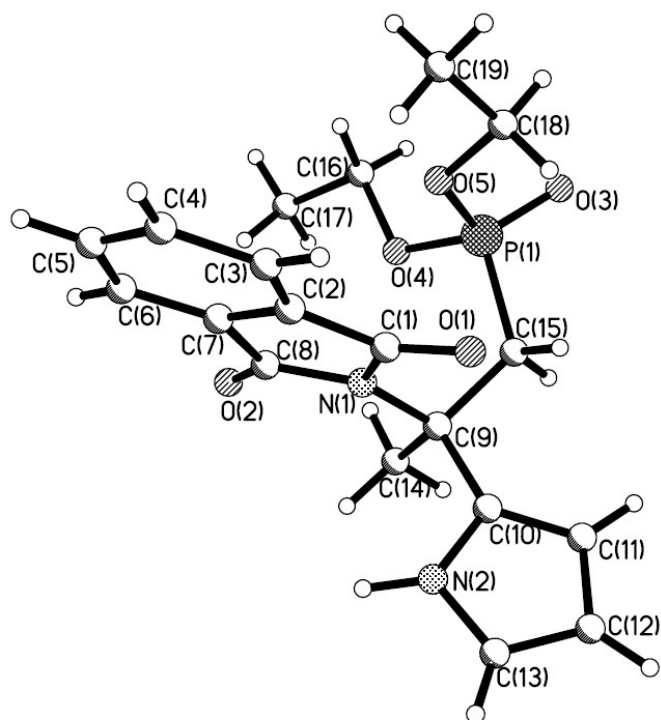

X-ray crystal structure of **6a**

Table 1. Crystal data and structure refinement for SA.

|                             |                                                                 |                |
|-----------------------------|-----------------------------------------------------------------|----------------|
| Identification code         | sa                                                              |                |
| Empirical formula           | C <sub>19</sub> H <sub>23</sub> N <sub>2</sub> O <sub>5</sub> P |                |
| Formula weight              | 390.36                                                          |                |
| Temperature                 | 113(2) K                                                        |                |
| Wavelength                  | 0.71073 Å                                                       |                |
| Crystal system, space group | Monoclinic, P2(1)/c                                             |                |
| Unit cell dimensions        | a = 12.744(3) Å                                                 | α = 90°        |
|                             | b = 7.7256(15) Å                                                | β = 109.09(3)° |
|                             | c = 20.770(4) Å                                                 | γ = 90°        |
| Volume                      | 1932.4(7) Å <sup>3</sup>                                        |                |
| Z, Calculated density       | 4, 1.342 Mg/m <sup>3</sup>                                      |                |
| Absorption coefficient      | 0.175 mm <sup>-1</sup>                                          |                |
| F(000)                      | 824                                                             |                |

|                                   |                                             |
|-----------------------------------|---------------------------------------------|
| Crystal size                      | 0.20 x 0.18 x 0.12 mm                       |
| Theta range for data collection   | 1.69 to 28.04°                              |
| Limiting indices                  | -16 ≤ h ≤ 16, -10 ≤ k ≤ 10, -16 ≤ l ≤ 27    |
| Reflections collected / unique    | 4619/4619 [R(int) = 0.0000]                 |
| Completeness to theta = 25.01     | 98.9%                                       |
| Absorption correction             | Semi-empirical from equivalents             |
| Max. and min. transmission        | 0.9793 and 0.9659                           |
| Refinement method                 | Full-matrix least-squares on F <sup>2</sup> |
| Data / restraints / parameters    | 4619/0/254                                  |
| Goodness-of-fit on F <sup>2</sup> | 1.878                                       |
| Final R indices [I > 2σ(I)]       | R1 = 0.1972, wR2 = 0.5345                   |
| R indices (all data)              | R1 = 0.2171, wR2 = 0.5409                   |
| Extinction coefficient            | 0.0000(10)                                  |
| Largest diff. peak and hole       | 1.148 and -1.073 e.Å <sup>-3</sup>          |
